# Supplementary material for: Neospongodes atlantica, a potential case of an early biological introduction in the Southwestern Atlantic
Source: PeerJ. 2022 Dec 15;10:e14347. doi: 10.7717/peerj.14347 (PMC9760029; doi:10.7717/peerj.14347)
Supplement: Supplemental Information 4 [file peerj-10-14347-s004.xlsx]

## Sheet: Planilha1
Sequences used for Neospongodes atlantica phylogenetic reconstruction and their respective GenBank Accession numbers.
Genus ID	Species ID	mtMutS	COI	28S
Acrophytum	claviger	-	JX203823	-
Capnella	imbricata	MH516867	MH516532	MH516871
Capnella	imbricata	MH516565	MH516531	MH516873
Capnella	imbricata	MH516562	MH516529	-
Capnella	cf. spicata	JX124372	JX124388	JX124345
Capnella	cf. spicata	JX124371	JX124387	JX124344
Chromonephthea	sp.	DQ302823	-	-
Dendronephthya	mutabilis	MG053060	MG053077	MG053016
Dendronephthya	sp.	KF915597	KF955057	KF915354
Dendronephthya	sp.	KF915602	KF955062	KF915359
Dendronephthya	sp.	KF915601	KF955061	KF915358
Dendronephthya	sinaiensis	GQ342506	GQ342433	JX124349
Dendronephthya	putteri	-	HQ694726	-
Dendronephthya	putteri	-	JQ886185	-
Dendronephthya	suensoni	-	JQ290079	-
Dendronephthya	gigantea	-	FJ372991	-
Dendronephthya	cf.	KF915599	KF955059
Dendronephthya	klunzingeri	GU356018	GU355995	-
Dendronephthya	formosa	GU356020	GU355997	-
Dendronephthya	sp.	GU356021	GU355998	-
Dendronephthya	cf.	KF915607	KF955067	KF915364
Dendronephthya	cf.	KF915606	KF955066	KF915363
Dendronephthya	hemprich	GU356019	GU355996	-
Dendronephthya	cf.	KF915605	KF955065	KF915362
Dendronephthya	sp.	KF915598	KF955058	KF915355
Dendronephthya	mollis	-	HQ694725	-
Dendronephthya	castanea	-	GU047877	-
Dendronephthya	suensoni	-	GU047878	-
Dendronephthya	sp.	KF915600	KF955060	KF915357
Dendronephthya	sp.	KF915604	KF955064	KF915361
Dendronephthya	sp.	KF915603	KF955063	KF915360
Dendronephthya	savignyi	GU356022	GU355999	-
Dendronephthya	sp.	KC864907	KC864976	KC864843
Dendronephthya	sp.	KC864908	KC864977	KC864844
Dendronephthya	sp.	KC864906	KC864975	KC864842
Dendronephthya	sp.	KC864885	KC864952	KC864823
Dendronephthya	sp.	KC864911	KC864980	KC864847
Dendronephthya	sp.	KC864883	KC864950	KC864821
Eunephthya	susanae	JX124360	JX124381	JX124337
Eunephthya	susanae	JX124361	JX124382	JX124338
Eunephthya	susanae	JX124359	JX124380	JX124336
Eunephthya	ericius	JX124355	JX124376	JX124332
Eunephthya	ericius	JX124354	JX124375	JX124331
Eunephthya	ericius	JX124353	JX124374	JX124330
Eunephthya	shirleyae	JX124357	JX124378	JX124334
Eunephthya	shirleyae	JX124358	JX124379	JX124335
Eunephthya	celata	JX124352	JX124373	JX124329
Eunephthya	thyrsoidea	JX124365	JX124385	JX124341
Eunephthya	thyrsoidea	JX124366	JX124386	JX124342
Eunephthya	thyrsoidea	JX124363	JX124383	JX124339
Eunephthya	thyrsoidea	JX124364	JX124384	JX124340
Eunephthya	granulata	JX124356	JX124377	JX124333
Gersemia	rubiformis	GQ342474	GQ342390	JX203648
Gersemia	antarctica	GQ342473	GQ342389	JX203646
Gersemia	juliepackardae	JX203768	JX20382	JX203647
Lemnalia	sp.	KF915631	KF955096	KF915392
Lemnalia	sp.	KF915635	KF955102	KF915398
Lemnalia	sp.	KF915634	KF955101	KF915397
Lemnalia	sp.	KF915636	KF955104	KF915400
Lemnalia	sp.	KF915632	KF955097	KF915393
Lemnalia	sp.	KF915633	KF955098	KF915394
Litophyton	sp.	MH516627	MH516472	-
Litophyton	sp.	MH516626	MH516471	-
Litophyton	sp.	MH516623	MH516470	-
Litophyton	sp.	MH516629	MH516473	MH516906
Litophyton	sp.	MH516624	MH516553	-
Litophyton	sp.	MH516630	MH516474	-
Litophyton	sp.	KC864879	KC864944	-
Litophyton	sp.	KC864971	KC864903	-
Litophyton	sp.	KC864870	KC864934	KC864816
Neospongodes	atlantica	OL684635	OL684634	OL684632 and OL684633
Nephthea	sp.	KF915652	KF955121	KF915417
Nephthea	sp.	KF915653	KF955122	-
Nephthea	elatensis	GQ342508	GQ342435	JX203725
Nephthea	acuticonica	GU356023	GU356000	-
Paralemnalia	eburnea	KC864895	KC864963	KC864831
Paralemnalia	thyrsoides	KC864913	KC864982	KC864849
Paralemnalia	thyrsoides	KC864899	KC864968	KC864837
Paralemnalia	eburnea	GU356030	GU356007	-
Paralemnalia	thyrsoides	GQ342509	GQ342436	JX203727
Paralemnalia	sp.	KF915661	KF955133	KF915426
Paralemnalia	sp.	KF915656	KF955127	KF915420
Paralemnalia	sp.	KF915660	KF955132	KF915425
Paralemnalia	sp.	KF915658	KF955129	KF915422
Paralemnalia	thyrsoides	MH516632	MH516518	MH516907
Paralemnalia	sp.	KF915659	KF955131	KF915424
Scleronephthya	sp.	KF915721	KF955194	KF915485
Scleronephthya	gracillimum	-	GU047879	-
Scleronephthya	sp.	KF915723	KF955196	KF915487
Scleronephthya	sp.	KF915722	KF955195	KF915486
Scleronephthya	corymbosa	GQ342511	GQ342438	JX124350
Stereonephthya	sp.	KF915787	KF955264	KF915541
Stereonephthya	sp.	KF915786	KF955263	-
Stereonephthya	sp.	KF915788	KF955265	KF915542
Stereonephthya	cundabiluensis	GQ342512	-	JX124351
Stereonephthya	sp.	KF915784	KF955260	KF915538
Stereonephthya	sp.	KF915785	KF955262	KF915540
Stereonephthya	sp.	KF915782	KF955258	KF915537
Stereonephthya	sp.	KF915783	KF955259	-
Stereonephthya	sp.	KC864918	KC864987	KC864854
Stereonephthya	sp.	KC864919	KC864988	KC864855
