# Supplementary material for: Neospongodes atlantica, a potential case of an early biological introduction in the Southwestern Atlantic
Source: PeerJ. 2022 Dec 15;10:e14347. doi: 10.7717/peerj.14347 (PMC9760029; doi:10.7717/peerj.14347)
Supplement: Supplemental Information 5 — Previous and new geographic records of Neospongodes atlantica. [file peerj-10-14347-s005.xlsx]

## Sheet: General
species	Log	Lat		Source
atlt	-45.64166667	-0.541667		In situ observations
atlt	-38.25	-2.25
atlt	-38.25	-2.25
atlt	-39.5	-2.36667
atlt	-39.16666667	-2.68333
atlt	-39.16666667	-2.68333
atlt	-39.01666667	-2.73333
atlt	-39.06666667	-2.73833
atlt	-39.06666667	-2.73833
atlt	-39.06666667	-2.86667
atlt	-39.06666667	-2.86667
atlt	-38.96666667	-2.98333
atlt	-38.30027778	-3.56722
atlt	-38.30027778	-3.56722
atlt	-38.30027778	-3.56722
atlt	-38.30027778	-3.56722
atlt	-38.30027778	-3.56722
atlt	-38.30027778	-3.56722
atlt	-38.30027778	-3.56722
atlt	-37.9	-3.66667
atlt	-34.55111111	-4.36833
atlt	-36.53416667	-4.65083
atlt	-36.41666667	-4.75
atlt	-36.41666667	-4.75
atlt	-36.41666667	-4.75
atlt	-35.00333333	-5.55667
atlt	-35.00333333	-5.55667
atlt	-34.96805556	-5.75139
atlt	-34.86666667	-6.06806
atlt	-34.48333333	-7.66667
atlt	-34.56666667	-8.16667
atlt	-34.56666667	-8.16667
atlt	-34.65	-8.33333
atlt	-34.65	-8.33333
atlt	-34.7	-8.45
atlt	-34.68333333	-8.56667
atlt	-35.00055556	-5.55111
atlt	-38.75388889	-18.0011
atlt	-39.02138889	-17.5158
atlt	-39.03333333	-17.7811
atlt	-38.99333333	-17.8569
atlt	-39.02777778	-17.48
atlt	-39.09138889	-16.8961
atlt	-38.51666667	-12.9167
	-39	-17.5
	-38.9667	-16.3833	Recife de fora	Alves de Lima, Loiane, et al. "Identification of a novel antimicrobial peptide from Brazilian coast coral Phyllogorgia dilatata." Protein and peptide letters 20.10 (2013): 1153-1158.
	-39.0914	-16.8961		Dutra, Guilherme F., et al. A Rapid Marine Biodiversity Assessment of the Albrolhos Bank, Bahia, Brazil. Center for Applied Biodiversity Science (CABS), 2006.
	-38.9192	-14.7456
	-38.1442	-17.9092
	-38.8506	-17.9906
	-38.5906	-18.1022
	-38.6903	-17.9072
	-39.0278	-17.4783
	-39	-18.3333	estação 50. 35m	Ferreira, Renato Vinicius. Caracterização dos hábitos bênticos do Banco de Abrolhos (BA) com a utilização de imagens de veículo submersível de operação remota (ROV). Diss. Universidade de São Paulo.
	-38.971111	-17.426111	specieslink	Abrolhos
	-39.091389	-16.895833	specieslink	Abrolhos
	-38.979167	-17.875	specieslink	Abrolhos
	-38.918889	-17.745556	specieslink	Abrolhos
	-38.703611	-18.003889	specieslink	Abrolhos
	-38.590556	-18.101944	specieslink	Abrolhos
	-39.027778	-17.478333	specieslink	Abrolhos
	-38.690278	-17.906944	specieslink	Abrolhos
	-5.5567	-35.0033	gbif	natal

## Sheet: Previous
Species	Long	Lat
atl	-35.00055556	-5.55111
atl	-38.75388889	-18.0011
atl	-39.02138889	-17.5158
atl	-39.03333333	-17.7811
atl	-38.99333333	-17.8569
atl	-39.02777778	-17.48
atl	-39.09138889	-16.8961
atl	-38.51666667	-12.9167
atl	-38.9667	-16.3833
atl	-39.0914	-16.8961
atl	-38.9192	-14.7456
atl	-38.1442	-17.9092
atl	-38.8506	-17.9906
atl	-38.5906	-18.1022
atl	-38.6903	-17.9072
atl	-39.0278	-17.4783
atl	-39	-18.3333
atl	-38.971111	-17.426111
atl	-39.091389	-16.895833
atl	-38.979167	-17.875
atl	-38.918889	-17.745556
atl	-38.703611	-18.003889
atl	-38.590556	-18.101944
atl	-39.027778	-17.478333
atl	-38.690278	-17.906944
atl	-35.0033	-5.5567

## Sheet: New
Species	Log	Lat
atlt	-45.64166667	-0.541667
atlt	-38.25	-2.25
atlt	-39.5	-2.36667
atlt	-39.16666667	-2.68333
atlt	-39.06666667	-2.73833
atlt	-39.06666667	-2.86667
atlt	-38.96666667	-2.98333
atlt	-38.30027778	-3.56722
atlt	-37.9	-3.66667
atlt	-34.55111111	-4.36833
atlt	-36.53416667	-4.65083
atlt	-36.41666667	-4.75
atlt	-35.00333333	-5.55667
atlt	-34.96805556	-5.75139
atlt	-34.86666667	-6.06806
atlt	-34.48333333	-7.66667
atlt	-34.56666667	-8.16667
atlt	-34.65	-8.33333
atlt	-34.7	-8.45
atlt	-34.68333333	-8.56667
atlt	-35.00055556	-5.55111
atlt	-38.75388889	-18.0011
atlt	-39.02138889	-17.5158
atlt	-39.03333333	-17.7811
atlt	-38.99333333	-17.8569
atlt	-39.02777778	-17.48
atlt	-39.09138889	-16.8961
atlt	-38.51666667	-12.9167
