# Supplementary material for: Neospongodes atlantica, a potential case of an early biological introduction in the Southwestern Atlantic
Source: PeerJ. 2022 Dec 15;10:e14347. doi: 10.7717/peerj.14347 (PMC9760029; doi:10.7717/peerj.14347)
Supplement: Supplemental Information 6 — PCA1, PCA2, possible combinations of the variables, Pearson correlation, set of variables used [file peerj-10-14347-s006.xlsx]

## Sheet: 3.1_PCA_1
	PC1	PC2	PC3	PC4	PC5	PC6	PC7	PC8	PC9	PC10	PC11	PC12	PC13	PC14	PC15	PC16	PC17	PC18	PC19	PC20	PC21	PC22	PC23	PC24	PC25	PC26	PC27	PC28	PC29	PC30	PC31	PC32	PC33	PC34	PC35	PC36	PC37	PC38	PC39	PC40	PC41	PC42	PC43	PC44
present.benthic.mean.depth.chlorophyll.max	-0.162887	-0.00128614	0.0540914	-0.229207	-0.134357	-0.149407	0.228917	0.183319	-0.0202501	0.0414386	0.066315	-0.0287226	-0.0474486	0.0362948	-0.0903973	0.0565702	-0.101334	0.17595	-0.0993561	0.169704	-0.0910368	-0.0855465	0.200657	0.0590602	0.0541077	0.124233	0.12087	0.0772501	0.0138321	0.0173454	0.0414251	0.00586381	0.0146205	0.00265065	0.00128705	0.000347287	0.214474	0.717316	0.166724	0.0143805	0.0101145	0.00356676	0.0033503	0
present.benthic.mean.depth.chlorophyll.mean	-0.164046	0.000802675	0.104267	-0.178738	0.0566632	-0.0285656	0.0772982	0.199711	-0.207809	0.179636	0.265909	-0.210877	0.048794	-0.0686913	-0.0507066	-0.0168601	-0.121951	0.143521	-0.0158732	-0.0998316	0.0620568	-0.210217	-0.208771	-0.101758	-0.274494	-0.474112	-0.330993	-0.316439	-0.0636234	-0.0698866	-0.094014	0.0079962	-0.0666114	-0.00325569	-0.00506857	3.28879e-05	1.57104e-06	1.13036e-06	9.31917e-06	8.50041e-07	7.47503e-07	-3.82684e-07	-9.48152e-08	-1.2528e-07
present.benthic.mean.depth.chlorophyll.min	-0.165535	0.0296888	0.0668492	-0.0819612	0.17885	0.0464956	-0.169505	0.159903	-0.358846	0.318694	0.366133	-0.155693	0.0585933	-0.0407026	-0.10376	0.414382	0.0380947	-0.184426	0.00697124	-0.1904	0.0506399	0.044325	0.103608	0.0344636	0.0533994	0.315421	0.228904	0.145349	0.0540849	0.0297657	0.0591815	0.0192216	0.0290018	0.0047552	0.000999834	-0.000111431	-0.0426278	-0.142563	-0.0331401	-0.00285857	-0.00201072	-0.000708677	-0.000665799	2.48941e-08
present.benthic.mean.depth.chlorophyll.range	-0.160097	-0.00885122	0.0502572	-0.262235	-0.209256	-0.195395	0.323433	0.18664	0.0628973	-0.0269724	-0.00794603	0.00273585	-0.0727805	0.0546644	-0.085937	-0.0317593	-0.134132	0.261848	-0.124076	0.255618	-0.124521	-0.116212	0.22177	0.0643014	0.0535673	0.0757927	0.0928304	0.0595842	0.00379852	0.0140506	0.0365423	0.00257944	0.0108613	0.00207815	0.0013188	-0.000329575	-0.174138	-0.582414	-0.135373	-0.0116766	-0.00821261	-0.00289583	-0.0027202	3.83523e-08
present.benthic.mean.depth.current.velocity.max	0.00740866	0.31957	-0.462684	-0.00816788	0.07504	0.115315	0.102712	0.0726323	0.350189	0.185236	0.48342	0.174944	0.108187	-0.155676	0.190046	-0.24059	-0.138872	-0.167369	0.0769797	0.0546909	0.0301686	-0.124318	0.134397	0.0545891	0.0544237	-0.0114936	0.0236754	0.000350725	-0.00877734	0.0149217	0.00944776	-0.00835774	-0.000543643	-0.000458087	-0.000611043	5.36977e-06	7.33651e-08	-4.69728e-07	7.32405e-08	9.44108e-08	-6.36271e-08	7.21848e-08	9.36583e-09	4.17526e-08
present.benthic.mean.depth.current.velocity.mean	-0.0573491	0.322793	-0.383578	-0.109273	0.0418949	-0.296061	-0.0892499	-0.116053	-0.233577	0.0423157	0.0673391	0.192893	0.105697	0.311923	-0.0184741	-0.0114054	0.368544	0.398753	-0.0856657	0.00899941	0.0108142	0.2831	-0.15111	-0.0643875	-0.0442879	0.00960624	-0.0555689	0.0222456	0.00820482	-0.0117802	-0.00444301	0.0146678	-0.000409394	0.00146866	0.00151822	-1.62185e-05	8.79376e-07	1.42287e-06	-3.58395e-07	-7.81518e-08	1.52251e-07	-1.14245e-07	-2.18515e-08	-9.4934e-08
present.benthic.mean.depth.current.velocity.min	-0.105508	0.251836	-0.339635	-0.0184757	0.0450796	-0.460364	-0.207877	-0.118945	-0.135017	0.0382046	-0.388011	-0.3505	-0.136415	-0.29614	-0.00816605	-0.0234212	-0.28568	-0.141158	0.0995382	-0.0219744	-0.0263243	-0.147634	0.0416545	0.0318058	0.0155864	0.00557763	0.0255997	-0.00539129	-0.0114376	0.00656415	0.00671601	-0.00812479	-0.000225406	-0.000672749	-0.000730994	7.08896e-06	-5.19827e-07	-5.66661e-07	2.54855e-07	8.90884e-09	-6.71588e-08	4.91058e-08	1.89417e-08	5.21488e-08
present.benthic.mean.depth.current.velocity.range	-0.126334	0.208084	-0.247719	0.136224	0.0762744	0.498481	0.561811	-0.0697274	-0.45093	-0.134383	-0.227318	-0.0691836	-0.0234358	-0.0298708	-0.00980846	0.0155049	0.02076	-0.0516424	-0.0126742	-0.0128587	-0.0154358	-0.0271628	0.0371212	0.0236797	3.44119e-05	0.000461727	0.00578186	-0.00183477	0.00127816	-0.0012221	-0.00283248	-0.00175921	-0.000254315	4.03465e-05	-0.000119693	-1.73701e-06	-6.1843e-08	-4.10522e-07	-1.42895e-07	-3.79269e-08	-1.41226e-08	1.69696e-08	-5.41692e-09	3.1745e-09
present.benthic.mean.depth.dissolved.oxygen.max	-0.0209457	-0.397519	-0.175892	-0.191281	0.339767	-0.0728932	0.127659	-0.174823	0.00926401	0.0358857	-0.00306042	0.0708827	-0.0311493	-0.0520942	-0.021068	-0.0226829	0.0218086	-0.0006316	0.00739955	-0.00450472	0.00383369	0.0419825	-0.0182862	-0.0269051	0.0201754	-0.231719	0.369657	-0.0353106	0.0227077	-0.0409044	-0.019155	0.0174524	-0.00672707	0.00282436	0.00283393	-0.00263152	-0.153548	-0.0949282	0.601803	0.0207103	0.0414744	-0.00775585	0.000303948	-0.00865106
present.benthic.mean.depth.dissolved.oxygen.mean	-0.0179298	-0.399029	-0.205936	-0.154348	0.290704	-0.0480883	0.0809434	-0.0662445	-0.0125551	0.0215127	-0.00836022	0.0672888	-0.0253515	-0.0333357	-0.0245198	0.013531	0.00266699	-0.0256708	0.025552	0.0533986	-0.0057462	-0.0592138	0.0395395	0.0575282	0.0234739	0.374337	-0.683463	0.0857637	-0.0901631	0.130853	0.117885	-0.0418067	0.00479603	0.00473676	-0.00476111	1.12543e-05	7.35282e-07	-9.02609e-07	-5.27557e-06	3.60861e-07	-7.8687e-08	1.25618e-07	7.87158e-08	3.75911e-07
present.benthic.mean.depth.dissolved.oxygen.min	-0.0253496	-0.395681	-0.236182	-0.111525	0.220915	-0.041655	0.0483269	-0.00606138	-0.0217762	-0.0122648	-0.0118686	0.0518786	-0.0275664	-0.0321657	0.000915966	-0.0318302	0.0233114	0.00163206	-0.013117	-0.0144098	0.00438105	0.0358064	-0.0117344	-0.0265507	0.0164146	-0.194976	0.308554	-0.029157	0.0179557	-0.0345939	-0.0144556	0.0136106	-0.00529421	0.00201015	0.00223147	0.00313888	0.184947	0.114342	-0.724868	-0.0249462	-0.049956	0.0093419	-0.000366135	0.0104199
present.benthic.mean.depth.dissolved.oxygen.range	0.036824	0.303719	0.417057	-0.21872	0.282956	-0.0872577	0.266729	-0.643392	0.136318	0.194564	0.0431505	0.0322416	0.00789086	-0.0512766	-0.0851553	0.060129	-0.0240899	-0.00998076	0.0891002	0.0493494	-0.00554848	-0.00439493	-0.0159518	0.0195074	0.00153609	0.011953	-0.00767796	-0.000752981	0.0043481	0.00279547	-0.00647647	0.00398197	-0.00171809	0.00118531	-5.26568e-05	0.000676704	0.0399793	0.0247173	-0.156693	-0.00539253	-0.0107988	0.00201942	-7.91426e-05	0.00225245
present.benthic.mean.depth.light.bottom.max	-0.139761	-0.0277857	0.0722589	0.519277	0.226823	-0.390503	0.242391	0.0328113	-0.000894849	-0.198504	0.251158	-0.182565	-0.0465515	0.367937	-0.110716	-0.106499	-0.0608456	-0.260312	-0.0708397	0.163646	0.192506	0.0504198	-0.0177347	0.0266565	-0.00855547	-0.00844526	-0.00183777	0.00397074	-0.000575237	-0.00372707	-0.00346397	-0.0035258	0.00125342	-0.000894158	-2.76311e-05	1.12025e-05	2.41938e-08	-4.8304e-07	-1.12453e-07	6.62603e-08	7.74578e-09	1.36334e-08	-1.35748e-09	5.00152e-09
present.benthic.mean.depth.light.bottom.mean	-0.158785	-0.021454	0.0509952	0.326862	0.105108	-0.146898	0.0470809	-0.0703076	0.0227874	-0.270717	0.203922	0.0978695	-0.0098371	-0.217467	0.102981	0.111625	0.0603435	0.273412	0.116737	-0.367099	-0.610057	-0.157793	0.0664725	-0.0230794	0.0139638	0.0106733	-0.000254909	-0.00176785	0.0046128	0.0165253	0.0144076	0.00591383	-0.00455245	0.00205279	0.000302819	-4.06325e-05	-3.18572e-07	9.95666e-07	5.0821e-07	-9.64321e-08	5.65532e-08	-2.6186e-08	-1.20147e-09	5.95309e-10
present.benthic.mean.depth.light.bottom.min	-0.164911	-0.0137975	0.0288479	0.215189	0.0305733	-0.0161302	-0.0598384	-0.0866523	-0.0259989	-0.171502	0.0518422	0.231078	-0.042661	-0.372939	0.231916	0.351786	-0.108003	0.343791	-0.0305749	0.231941	0.560309	-0.0414133	0.0652372	-0.060655	-0.00797584	-0.0135597	0.00251052	0.00041934	-0.00415684	0.00355545	0.0100339	0.002306	-0.000478532	-0.000810187	-0.000398463	2.49712e-05	4.76739e-07	-3.34565e-07	-8.85275e-07	2.16359e-08	-7.05076e-08	-7.2191e-09	-1.10331e-08	8.76587e-09
present.benthic.mean.depth.light.bottom.range	-0.154037	-0.0303777	0.0694227	0.378254	0.130638	-0.077965	0.179328	0.251056	0.192014	0.665269	-0.384659	0.126539	0.117089	-0.0870466	0.00950321	-0.0259049	0.161295	0.120275	-0.0082077	-0.0393354	-0.0104333	0.0228783	-0.0239002	-0.0125016	0.00470816	0.0101478	-0.000792983	-0.00685289	-3.28244e-05	-0.00257331	-0.00319168	0.000648675	0.000846436	4.0117e-05	-1.24571e-05	2.74322e-06	6.55329e-08	5.70644e-08	-5.13815e-08	2.39826e-08	-3.78613e-08	-1.73544e-08	1.6495e-09	-4.53396e-09
present.benthic.mean.depth.nitrate.max	0.168719	-0.0118383	0.0254126	0.0238312	-0.0374661	-0.0682698	0.0648128	0.0115934	-0.0786574	0.0132722	0.0302001	-0.0398894	0.0951022	-0.0919511	-0.00390227	-0.039405	-0.00712248	0.0217882	-0.0411382	-0.0654734	0.0406465	0.0773271	0.0619916	0.0344878	0.186637	-0.122676	-0.0629154	0.040906	-0.0095534	0.0442124	0.208271	0.40032	0.015778	-0.19396	0.271775	0.000232951	0.000682208	-0.00104748	-0.00326271	-0.0154595	-0.0487732	0.0799616	0.474946	-0.552409
present.benthic.mean.depth.nitrate.mean	0.168564	-0.019601	0.0239325	0.0289371	-0.0497722	-0.0686748	0.0662512	0.0020611	-0.0788811	0.0166636	0.0316591	-0.0455168	0.0993061	-0.0898941	0.00280766	-0.047399	-0.0134905	0.0327328	-0.0393094	-0.0756897	0.0481539	0.0914196	0.0687989	0.0699188	0.173223	-0.0930721	-0.0464432	0.0741957	0.0461404	0.00156885	0.16952	0.215058	-0.412849	0.542045	-0.55848	-0.00143344	-2.61228e-05	2.13959e-05	4.92714e-05	-1.87672e-05	-1.34325e-05	2.43827e-06	8.58955e-06	-6.62898e-06
present.benthic.mean.depth.nitrate.min	0.168335	-0.0276014	0.021366	0.0336095	-0.0633413	-0.068972	0.0695943	-0.00898398	-0.0822137	0.0257241	0.0397132	-0.0553047	0.0971463	-0.0947807	0.00514994	-0.0474041	-0.0106333	0.036319	-0.0384431	-0.0826484	0.0505971	0.0955988	0.0617173	0.1141	0.17126	-0.132019	-0.0634726	0.0413331	-0.00724509	0.0547834	0.232098	0.432537	0.017303	-0.210508	0.29603	0.000196882	-0.000610156	0.000994591	0.00297687	0.0142217	0.0448382	-0.0734886	-0.436475	0.507656
present.benthic.mean.depth.nitrate.range	0.155334	0.149843	0.0640024	-0.0781539	0.229783	-0.0541241	0.00949451	0.219883	-0.0343932	-0.114848	-0.0697384	0.121126	0.0645465	-0.0537212	-0.0956535	0.0460646	0.0293477	-0.128368	-0.0643582	0.116078	-0.064816	-0.116602	0.0584309	-0.779503	0.324047	-0.0149905	-0.0507917	0.0323735	-0.0320712	-0.0679355	-0.0556465	0.0313287	-0.00135211	-0.00548496	-0.00319011	3.19344e-05	-5.93877e-05	0.000100286	0.000290493	0.00139587	0.00440333	-0.00721902	-0.0428753	0.0498677
present.benthic.mean.depth.phosphate.max	0.168704	-0.00789145	0.032179	0.0192185	-0.0346729	-0.0678943	0.0670421	0.0144308	-0.0819849	0.0153362	0.0378302	-0.0499644	0.0909319	-0.0844043	0.00630638	-0.0410903	0.00648857	0.0408964	-0.0236971	-0.0681934	0.0402271	0.0875269	0.0639675	0.0160201	0.0838499	-0.1004	0.0209606	0.00985264	-0.202294	0.185544	0.120732	-0.299911	0.234268	-0.240553	-0.294009	0.00127606	-0.000416034	0.00675837	-0.0243466	-0.434614	0.565709	-0.053501	0.00259031	-0.0431768
present.benthic.mean.depth.phosphate.mean	0.168631	-0.0139831	0.0283514	0.0247993	-0.0473003	-0.0676942	0.068205	0.00495644	-0.0825405	0.0214038	0.040665	-0.0514433	0.0935006	-0.0834783	0.00311125	-0.0432112	-0.00103693	0.0415002	-0.0243841	-0.0717777	0.0434129	0.0899929	0.0759329	-0.00570909	0.0758761	-0.0688521	0.0237525	0.0442921	-0.166107	0.124167	0.0745496	-0.50978	-0.175528	0.453577	0.589944	0.000475395	-4.76494e-05	1.87868e-06	-8.82054e-05	-3.13948e-08	1.6239e-05	-4.66531e-06	-2.85111e-07	3.58154e-06
present.benthic.mean.depth.phosphate.min	0.168506	-0.0201958	0.0238639	0.0296028	-0.0603136	-0.0679938	0.0705396	-0.00698025	-0.0857097	0.0299068	0.047088	-0.0543904	0.0899998	-0.0844986	-0.00130963	-0.0415124	0.000773458	0.0422009	-0.0304034	-0.0725481	0.0405449	0.0886321	0.0671751	-0.00244635	0.0901925	-0.101623	0.0198817	0.010293	-0.208207	0.188753	0.122236	-0.308249	0.241427	-0.247997	-0.302986	-0.000916718	0.000450092	-0.0066179	0.0236974	0.421876	-0.549146	0.0519414	-0.00251278	0.0419112
present.benthic.mean.depth.phosphate.range	0.110972	0.253009	0.194731	-0.205576	0.515695	-0.0409042	-0.0308868	0.458098	0.0261901	-0.295817	-0.170172	0.0611685	0.0771215	-0.0514686	0.163688	-0.0171653	0.123947	-0.00145705	0.125613	0.0481345	0.0188065	0.0322504	-0.0267489	0.397358	-0.0799093	-0.037962	0.035885	-0.00291894	-0.00414441	0.0502199	0.0448198	-0.0149978	-0.00182006	0.00417835	0.00263115	-7.23406e-05	1.96504e-05	-0.000316046	0.00112927	0.0201195	-0.0261883	0.00247711	-0.00011987	0.00199886
present.benthic.mean.depth.phytoplankton.max	-0.16819	-9.87888e-05	0.0155346	-0.0740726	-0.0981478	-0.0549616	0.0847778	0.037504	0.038597	-0.032454	0.0196611	0.0293344	-0.0634654	-0.103819	0.0861449	0.0731042	0.0391455	-0.138785	0.00473936	-0.00224105	-0.0364683	0.232295	-0.180639	0.0559385	0.269308	0.0338053	-0.0359677	-0.222682	-0.0739135	-0.00870322	-0.0922038	-0.0100616	-0.0176994	0.000316318	0.000909993	0.0011928	-0.0175699	0.000350954	-0.0617508	0.644676	0.478482	-0.099397	0.0158086	-0.060758
present.benthic.mean.depth.phytoplankton.mean	-0.168507	-0.0126314	0.0495965	-0.0173323	-0.0199974	0.0256944	-0.0460262	-0.00149853	-0.0595261	0.0329235	0.0412924	0.00287662	-0.0312059	-0.0479642	0.0384242	-0.0481517	0.0077092	-0.0234024	0.00796908	0.0630646	-0.0363823	-0.0321004	-0.20346	0.144154	0.317012	-0.343138	-0.174664	0.697958	0.234031	-0.144521	-0.197402	-0.149335	0.0953394	-0.0317447	-0.00118013	6.51411e-05	4.10618e-06	1.65772e-06	5.35441e-06	-6.01907e-07	1.26883e-06	2.17694e-07	2.19902e-07	-2.27818e-07
present.benthic.mean.depth.phytoplankton.min	-0.168619	-0.0105833	0.0380515	0.0103127	-0.0186319	0.0293726	-0.113772	-0.0440354	-0.100313	0.0314332	0.0275459	0.0680917	-0.0115629	0.010417	0.0229654	-0.00435202	0.0670915	-0.045679	-0.0419714	0.163118	-0.0783475	-0.0555584	-0.134817	0.246575	0.614526	0.0230933	-0.0104414	-0.441682	-0.170245	-0.00912473	-0.16462	-0.029941	-0.0423022	-0.000975125	0.00256847	-0.000462175	0.00918718	-0.00018984	0.0322821	-0.337145	-0.250233	0.0519816	-0.00826741	0.0317751
present.benthic.mean.depth.phytoplankton.range	-0.164711	0.0111911	-0.00898658	-0.163597	-0.181998	-0.144774	0.297024	0.12462	0.187461	-0.100656	0.0108195	-0.0129195	-0.118207	-0.224948	0.152622	0.155186	0.00835563	-0.236537	0.0549449	-0.180233	0.00927498	0.538045	-0.226734	-0.150312	-0.107199	0.044733	-0.0628072	0.0170947	0.0311254	-0.00808424	-0.0125919	0.0115177	0.00909308	0.00166612	-0.000795619	-0.000565322	0.00853411	-0.000170475	0.0299936	-0.313146	-0.232419	0.0482812	-0.00767887	0.0295126
present.benthic.mean.depth.primary.productivity.max	-0.166795	-0.0202072	0.0447168	-0.0934311	-0.155025	-0.143145	0.0417776	-0.0371275	-0.0659461	-0.0557238	-0.07071	0.210195	0.103037	0.053288	0.0446447	-0.0288753	0.238655	-0.232233	0.116927	-0.195474	0.162596	-0.203742	0.240078	0.0180931	-0.0160689	-0.0877746	-0.0342705	-0.0190659	0.0073703	-0.00387492	-0.00805942	-0.0083697	0.000634319	-0.000900128	-0.000559367	-0.736255	0.00231399	0.00029139	-0.00266215	5.82754e-05	0.00135652	-0.000153563	4.98925e-05	-0.000118136
present.benthic.mean.depth.primary.productivity.mean	-0.161762	-0.0649542	0.164965	-0.0564541	-0.0446639	-0.055455	0.0217284	-0.0168952	-0.222331	-0.031817	0.0162081	0.116411	0.239154	-0.0810073	0.207292	-0.480376	-0.1561	0.0304338	0.00467909	-0.0628708	0.0858987	-0.182358	-0.486373	-0.119429	-0.0356999	0.348191	0.206231	0.103598	-0.0441381	0.0876535	0.153914	0.0413865	-0.00955489	0.00266618	0.0030289	-4.84467e-05	-1.77188e-06	3.0008e-06	-2.86948e-06	6.38898e-08	-4.74998e-07	-5.80397e-08	-4.18948e-08	1.18806e-07
present.benthic.mean.depth.primary.productivity.min	-0.164858	-0.0469214	0.118351	0.0516518	-0.0099404	-0.0206094	-0.17326	-0.0589052	-0.317398	0.0712909	-0.0254885	0.327239	0.247607	-0.0279522	0.128095	-0.0878896	-0.261094	-0.223471	0.0530448	0.354	-0.300287	0.33936	0.292362	-0.0118907	-0.212304	-0.158915	-0.0780466	-0.0406	0.0136601	0.00128989	0.0225624	0.00488501	-0.000118168	0.00371442	-0.00143746	0.0644511	-0.000200927	-2.54133e-05	0.000237933	-5.01445e-06	-0.000118262	1.34619e-05	-4.39122e-06	1.01937e-05
present.benthic.mean.depth.primary.productivity.range	-0.166534	-0.0175954	0.0375455	-0.107074	-0.168505	-0.154499	0.0622627	-0.0349435	-0.0416927	-0.0677379	-0.0748464	0.198422	0.0889261	0.0609191	0.0365485	-0.0231311	0.285873	-0.23245	0.12271	-0.247553	0.206392	-0.255166	0.234455	0.0209799	0.0026523	-0.0807469	-0.0299319	-0.0166154	0.00666532	-0.00425896	-0.0109104	-0.00869153	-0.000138447	-0.000143555	-0.00211144	0.673606	-0.00211773	-0.000268114	0.00243703	-5.31813e-05	-0.00124099	0.000140611	-4.56419e-05	0.000108118
present.benthic.mean.depth.salinity.max	-0.168071	-0.00928535	0.0590873	-0.0294305	0.064766	0.0950563	-0.0697047	-0.00907285	0.0293811	0.00267808	0.00674513	-0.192957	-0.0765278	0.0565339	0.105504	-0.195744	0.0376011	0.132758	0.164441	-0.0335202	0.0674235	0.126559	0.172265	-0.122782	0.110889	-0.00554411	-0.0243228	-0.0774545	0.250705	0.197255	0.0365381	-0.0290102	0.00874307	-0.0017779	0.0035492	0.00177648	0.72929	-0.252187	0.144132	0.0166353	0.0220267	-0.00394889	0.000140175	-0.00233505
present.benthic.mean.depth.salinity.mean	-0.167834	-0.0173672	0.0635374	-0.0329128	0.0691859	0.0965266	-0.0645646	-0.0217751	0.0396168	0.00966836	0.00473189	-0.222778	-0.0659955	0.0831702	0.201396	-0.164856	0.0458687	0.125614	0.167481	-0.0493747	0.0530492	0.138517	0.218994	-0.0686637	0.0119552	0.0447099	0.0114312	0.185532	-0.660428	-0.453996	-0.045463	0.113337	-0.0101675	0.0149802	-0.00900181	-0.000141307	1.70096e-05	1.11797e-05	-1.05768e-05	-2.08743e-06	-6.30972e-07	4.7571e-07	2.91844e-07	-1.9618e-07
present.benthic.mean.depth.salinity.min	-0.167394	-0.0250805	0.0670581	-0.0532334	0.078345	0.0959101	-0.0609693	-0.0392269	0.0407888	0.033041	-0.0105544	-0.309826	-0.0537517	0.153136	0.379189	-0.14984	0.05855	0.131164	0.0945501	-0.0200942	0.0398069	0.0970475	0.207254	-0.165813	0.133451	-0.0187751	-0.032009	-0.0942308	0.321007	0.252771	0.0505184	-0.0376028	0.00952215	-0.00230155	0.00454889	-0.0012041	-0.542545	0.187597	-0.107218	-0.0123739	-0.0163859	0.00293717	-0.000104529	0.00173716
present.benthic.mean.depth.salinity.range	-0.167907	0.0361402	0.0354816	0.0392189	0.0250014	0.0914155	-0.0938883	0.077539	-0.00371021	-0.084453	0.0562848	0.14471	-0.140904	-0.221283	-0.680893	-0.324968	-0.0229618	0.135668	0.362863	-0.0716062	0.145795	0.209637	0.0697503	0.00220091	0.0447634	0.0324712	-0.00197709	-0.0283524	0.0458623	0.0354473	-0.00399038	-0.00408143	0.00631138	-0.000746721	0.00042695	-0.000407476	-0.189135	0.0653985	-0.0373779	-0.00431386	-0.00571239	0.00102394	-3.6406e-05	0.000605561
present.benthic.mean.depth.silicate.max	0.168012	-0.0351475	0.0279563	0.0368015	-0.0664394	-0.0681113	0.0486132	0.0217203	-0.140962	0.0793453	0.0930145	-0.0245498	-0.220753	-0.127305	0.0839049	-0.0679012	0.227826	-0.0306082	0.165298	0.195398	-0.043276	-0.0490103	-0.0119149	-0.0173396	-0.0940827	0.0254391	0.0373178	0.0614122	-0.0854078	0.217515	-0.255318	0.113437	-0.0305912	0.0171718	0.00201057	-0.000142296	0.00141627	0.00300984	-0.00300917	-7.18241e-05	-0.0277182	0.0714581	-0.577248	-0.483498
present.benthic.mean.depth.silicate.mean	0.16769	-0.0439925	0.0220984	0.0387708	-0.0764946	-0.0694881	0.0554028	0.0128558	-0.129091	0.063766	0.0987145	-0.0654266	-0.158008	-0.155699	0.0802766	-0.0646774	0.270708	-0.0303336	0.209352	0.241813	-0.0506894	-0.0545182	-0.0438144	0.00247029	-0.00561028	0.0713809	-0.0167089	-0.158185	0.28692	-0.565255	0.443397	-0.201119	0.066753	-0.0408114	-0.00615205	0.000261212	6.11697e-06	-1.08751e-05	4.18773e-05	1.35099e-06	-2.14336e-06	7.73711e-08	2.90324e-07	1.04942e-06
present.benthic.mean.depth.silicate.min	0.167183	-0.0540885	0.0163583	0.0418381	-0.0900139	-0.0705247	0.0571359	0.0122522	-0.126331	0.0626055	0.106018	-0.0982886	-0.127823	-0.179114	0.0651876	-0.0569645	0.312477	-0.0349634	0.215684	0.278623	-0.0588719	-0.0595987	-0.0237994	-0.0229146	-0.117603	0.0337508	0.0477361	0.0738733	-0.0981259	0.255126	-0.304448	0.134857	-0.0356323	0.020073	0.00226519	-0.000147613	-0.00120612	-0.00254276	0.00251418	5.94841e-05	0.0235315	-0.0606599	0.490017	0.410434
present.benthic.mean.depth.silicate.range	0.165156	0.0681533	0.0890567	0.00813793	0.0631195	-0.0521796	0.000704852	0.0716477	-0.21344	0.165837	0.0190991	0.372723	-0.71047	0.156613	0.180823	-0.12371	-0.236929	-0.0058755	-0.112621	-0.260281	0.0424051	0.0100153	0.0524606	0.0133695	0.0363884	-0.0203287	-0.0202836	-0.00821257	-0.0133549	0.00596718	0.0197641	-0.00656594	-0.0021762	0.000804327	0.000558519	1.45764e-05	-0.000224219	-0.000475163	0.000473391	1.12442e-05	0.00437936	-0.0112896	0.0911985	0.0763871
present.benthic.mean.depth.temperature.max	-0.16804	0.0451779	-0.00847353	-0.00402607	-0.00344874	0.0715678	-0.0755767	-0.0116959	0.07118	0.00146149	-0.0079229	0.0156067	-0.141294	0.0306465	-0.0385928	0.065099	0.104012	-0.0750866	-0.0096728	0.111843	-0.0616136	-0.0539921	-0.0870337	-0.0407863	-0.0298183	-0.116109	0.0333226	0.0870262	-0.141217	0.169535	0.310512	-0.0600456	-0.344847	-0.171926	-0.00236381	-0.000103436	0.00199915	0.00556177	-0.000511508	-0.0414967	-0.108833	-0.733573	-0.00326779	-0.0982282
present.benthic.mean.depth.temperature.mean	-0.168021	0.0449709	-0.0149235	-0.0028442	-0.00903071	0.073496	-0.0718664	-0.00838241	0.0708232	0.0053463	-0.00909036	0.0239585	-0.139933	0.0547414	-0.0362719	0.0832382	0.0830534	-0.0713221	0.0352035	0.119268	-0.0635012	-0.0854719	-0.133645	-0.0380948	-0.012121	-0.16859	0.00605058	0.00644693	-0.160189	0.191981	0.34918	0.192383	0.621835	0.476813	0.00651808	-0.000181914	-4.61927e-05	1.33736e-05	-7.76773e-05	-1.53797e-05	-7.02629e-06	5.97052e-06	3.72214e-06	-2.33971e-07
present.benthic.mean.depth.temperature.min	-0.168001	0.0443297	-0.0211716	-0.00343186	-0.0170533	0.0742234	-0.0675064	-0.00347265	0.0767862	0.00957769	-0.0156773	0.030229	-0.142621	0.0855342	-0.0344374	0.115555	0.0712098	-0.0704296	0.0937209	0.126762	-0.0671609	-0.0679697	-0.120237	-0.0502237	-0.0155185	-0.136185	0.0413641	0.0995033	-0.163075	0.196411	0.35364	-0.0677748	-0.394143	-0.196136	-0.00265348	-6.60671e-05	-0.00171381	-0.00487227	0.000529058	0.0363135	0.0952122	0.641711	0.00285536	0.0859289
present.benthic.mean.depth.temperature.range	-0.166337	0.0505048	0.0792953	-0.00808137	0.0905196	0.0523942	-0.130409	-0.0683332	0.0316401	-0.0545911	0.0457073	-0.0855305	-0.130471	-0.348665	-0.0668301	-0.284018	0.329262	-0.106358	-0.723404	0.00752882	-0.0225917	0.0431454	0.143226	0.0248444	-0.128194	0.0238599	-0.0225883	-0.000135672	0.011359	-0.0180159	0.00910859	-0.00596297	-0.000526988	-0.00276261	-0.000309026	-1.21401e-05	-0.000249609	-0.000706349	7.12559e-05	0.00525872	0.0137903	0.0929462	0.000413797	0.0124459

## Sheet: 3.2_PCA_2
	PERCENT AND ACCUMULATIVE EIGENVALUES
		PC Layer EigenValue Percent of EigenValues Accumulative of EigenValues
		1 2,723651e+000 67,2760 67,2760
		2 1,292496e+000 31,9255 99,2015
		3 1,915060e-002 0,4730 99,6745
		4 6,607766e-003 0,1632 99,8377
		5 5,498718e-003 0,1358 99,9736
		6 9,229947e-004 0,0228 99,9964
		7 1,471499e-004 0,0036 100,0000
		8 5,215502e-008 0,0000 100,0000

## Sheet: 3.3_all_combinations
2 variables	3 variables	4 variables	5 variables
1 2	1 2 3	1 2 3 4	1 2 3 4 5
1 3	1 2 4	1 2 3 5	1 2 3 4 6
1 4	1 2 5	1 2 3 6	1 2 3 4 7
1 5	1 2 6	1 2 3 7	1 2 3 4 8
1 6	1 2 7	1 2 3 8	1 2 3 5 6
1 7	1 2 8	1 2 4 5	1 2 3 5 7
1 8	1 2 9	1 2 4 6	1 2 3 5 8
2 3	1 2 10	1 2 4 7	1 2 3 6 7
2 4	1 2 11	1 2 4 8	1 2 3 6 8
2 5	1 2 12	1 2 5 6	1 2 3 7 8
2 6	1 2 13	1 2 5 7	1 2 4 5 6
2 7	1 2 14	1 2 5 8	1 2 4 5 7
2 8	1 3 4	1 2 6 7	1 2 4 5 8
3 4	1 3 5	1 2 6 8	1 2 4 6 7
3 5	1 3 6	1 2 7 8	1 2 4 6 8
3 6	1 3 7	1 3 4 5	1 2 4 7 8
3 7	1 3 8	1 3 4 6	1 2 5 6 7
3 8	1 3 9	1 3 4 7	1 2 5 6 8
4 5	1 3 10	1 3 4 8	1 2 5 7 8
4 6	1 3 11	1 3 5 6	1 2 6 7 8
4 7	1 3 12	1 3 5 7	1 3 4 5 6
4 8	1 3 13	1 3 5 8	1 3 4 5 7
5 6	1 3 14	1 3 6 7	1 3 4 5 8
5 7	1 4 5	1 3 6 8	1 3 4 6 7
5 8	1 4 6	1 3 7 8	1 3 4 6 8
6 7	1 4 7	1 4 5 6	1 3 4 7 8
6 8	1 4 8	1 4 5 7	1 3 5 6 7
7 8	1 4 9	1 4 5 8	1 3 5 6 8
	1 4 10	1 4 6 7	1 3 5 7 8
	1 4 11	1 4 6 8	1 3 6 7 8
	1 4 12	1 4 7 8	1 4 5 6 7
	1 4 13	1 5 6 7	1 4 5 6 8
	1 4 14	1 5 6 8	1 4 5 7 8
	1 5 6	1 5 7 8	1 4 6 7 8
	1 5 7	1 6 7 8	1 5 6 7 8
	1 5 8	2 3 4 5	2 3 4 5 6
	1 5 9	2 3 4 6	2 3 4 5 7
	1 5 10	2 3 4 7	2 3 4 5 8
	1 5 11	2 3 4 8	2 3 4 6 7
	1 5 12	2 3 5 6	2 3 4 6 8
	1 5 13	2 3 5 7	2 3 4 7 8
	1 5 14	2 3 5 8	2 3 5 6 7
	1 6 7	2 3 6 7	2 3 5 6 8
	1 6 8	2 3 6 8	2 3 5 7 8
	1 6 9	2 3 7 8	2 3 6 7 8
	1 6 10	2 4 5 6	2 4 5 6 7
	1 6 11	2 4 5 7	2 4 5 6 8
	1 6 12	2 4 5 8	2 4 5 7 8
	1 6 13	2 4 6 7	2 4 6 7 8
	1 6 14	2 4 6 8	2 5 6 7 8
	1 7 8	2 4 7 8	3 4 5 6 7
	1 7 9	2 5 6 7	3 4 5 6 8
	1 7 10	2 5 6 8	3 4 5 7 8
	1 7 11	2 5 7 8	3 4 6 7 8
	1 7 12	2 6 7 8	3 5 6 7 8
	1 7 13	3 4 5 6	4 5 6 7 8
	1 7 14	3 4 5 7
	1 8 9	3 4 5 8
	1 8 10	3 4 6 7
	1 8 11	3 4 6 8
	1 8 12	3 4 7 8
	1 8 13	3 5 6 7
	1 8 14	3 5 6 8
	1 9 10	3 5 7 8
	1 9 11	3 6 7 8
	1 9 12	4 5 6 7
	1 9 13	4 5 6 8
	1 9 14	4 5 7 8
	1 10 11	4 6 7 8
	1 10 12	5 6 7 8
	1 10 13
	1 10 14
	1 11 12
	1 11 13
	1 11 14
	1 12 13
	1 12 14
	1 13 14
	2 3 4
	2 3 5
	2 3 6
	2 3 7
	2 3 8
	2 3 9
	2 3 10
	2 3 11
	2 3 12
	2 3 13
	2 3 14
	2 4 5
	2 4 6
	2 4 7
	2 4 8
	2 4 9
	2 4 10
	2 4 11
	2 4 12
	2 4 13
	2 4 14
	2 5 6
	2 5 7
	2 5 8
	2 5 9
	2 5 10
	2 5 11
	2 5 12
	2 5 13
	2 5 14
	2 6 7
	2 6 8
	2 6 9
	2 6 10
	2 6 11
	2 6 12
	2 6 13
	2 6 14
	2 7 8
	2 7 9
	2 7 10
	2 7 11
	2 7 12
	2 7 13
	2 7 14
	2 8 9
	2 8 10
	2 8 11
	2 8 12
	2 8 13
	2 8 14
	2 9 10
	2 9 11
	2 9 12
	2 9 13
	2 9 14
	2 10 11
	2 10 12
	2 10 13
	2 10 14
	2 11 12
	2 11 13
	2 11 14
	2 12 13
	2 12 14
	2 13 14
	3 4 5
	3 4 6
	3 4 7
	3 4 8
	3 4 9
	3 4 10
	3 4 11
	3 4 12
	3 4 13
	3 4 14
	3 5 6
	3 5 7
	3 5 8
	3 5 9
	3 5 10
	3 5 11
	3 5 12
	3 5 13
	3 5 14
	3 6 7
	3 6 8
	3 6 9
	3 6 10
	3 6 11
	3 6 12
	3 6 13
	3 6 14
	3 7 8
	3 7 9
	3 7 10
	3 7 11
	3 7 12
	3 7 13
	3 7 14
	3 8 9
	3 8 10
	3 8 11
	3 8 12
	3 8 13
	3 8 14
	3 9 10
	3 9 11
	3 9 12
	3 9 13
	3 9 14
	3 10 11
	3 10 12
	3 10 13
	3 10 14
	3 11 12
	3 11 13
	3 11 14
	3 12 13
	3 12 14
	3 13 14
	4 5 6
	4 5 7
	4 5 8
	4 5 9
	4 5 10
	4 5 11
	4 5 12
	4 5 13
	4 5 14
	4 6 7
	4 6 8
	4 6 9
	4 6 10
	4 6 11
	4 6 12
	4 6 13
	4 6 14
	4 7 8
	4 7 9
	4 7 10
	4 7 11
	4 7 12
	4 7 13
	4 7 14
	4 8 9
	4 8 10
	4 8 11
	4 8 12
	4 8 13
	4 8 14
	4 9 10
	4 9 11
	4 9 12
	4 9 13
	4 9 14
	4 10 11
	4 10 12
	4 10 13
	4 10 14
	4 11 12
	4 11 13
	4 11 14
	4 12 13
	4 12 14
	4 13 14
	5 6 7
	5 6 8
	5 6 9
	5 6 10
	5 6 11
	5 6 12
	5 6 13
	5 6 14
	5 7 8
	5 7 9
	5 7 10
	5 7 11
	5 7 12
	5 7 13
	5 7 14
	5 8 9
	5 8 10
	5 8 11
	5 8 12
	5 8 13
	5 8 14
	5 9 10
	5 9 11
	5 9 12
	5 9 13
	5 9 14
	5 10 11
	5 10 12
	5 10 13
	5 10 14
	5 11 12
	5 11 13
	5 11 14
	5 12 13
	5 12 14
	5 13 14
	6 7 8
	6 7 9
	6 7 10
	6 7 11
	6 7 12
	6 7 13
	6 7 14
	6 8 9
	6 8 10
	6 8 11
	6 8 12
	6 8 13
	6 8 14
	6 9 10
	6 9 11
	6 9 12
	6 9 13
	6 9 14
	6 10 11
	6 10 12
	6 10 13
	6 10 14
	6 11 12
	6 11 13
	6 11 14
	6 12 13
	6 12 14
	6 13 14
	7 8 9
	7 8 10
	7 8 11
	7 8 12
	7 8 13
	7 8 14
	7 9 10
	7 9 11
	7 9 12
	7 9 13
	7 9 14
	7 10 11
	7 10 12
	7 10 13
	7 10 14
	7 11 12
	7 11 13
	7 11 14
	7 12 13
	7 12 14
	7 13 14
	8 9 10
	8 9 11
	8 9 12
	8 9 13
	8 9 14
	8 10 11
	8 10 12
	8 10 13
	8 10 14
	8 11 12
	8 11 13
	8 11 14
	8 12 13
	8 12 14
	8 13 14
	9 10 11
	9 10 12
	9 10 13
	9 10 14
	9 11 12
	9 11 13
	9 11 14
	9 12 13
	9 12 14
	9 13 14
	10 11 12
	10 11 13
	10 11 14
	10 12 13
	10 12 14
	10 13 14
	11 12 13
	11 12 14
	11 13 14
	12 13 14

## Sheet: 3.4_pearson_correlation
	chlorophyll.max	dissolved.oxygen.min	nitrate.range	primary.productivity.max	salinity.max	silicate.range	temperature.max	temperature.range
chlorophyll.max	1	0.0392375	-0.411962	0.87621	0.708263	-0.541863	0.676138	0.618374
dissolved.oxygen.min	0.0392375	1	-0.453123	0.0572144	0.0651122	-0.381034	-0.109635	-0.19101
nitrate.range	-0.411962	-0.453123	1	-0.640895	-0.571454	0.803706	-0.55651	-0.352617
primary.productivity.max	0.87621	0.0572144	-0.640895	1	0.791271	-0.678936	0.794648	0.717981
salinity.max	0.708263	0.0651122	-0.571454	0.791271	1	-0.713834	0.90096	0.908257
silicate.range	-0.541863	-0.381034	0.803706	-0.678936	-0.713834	1	-0.727654	-0.54423
temperature.max	0.676138	-0.109635	-0.55651	0.794648	0.90096	-0.727654	1	0.885467
temperature.range	0.618374	-0.19101	-0.352617	0.717981	0.908257	-0.54423	0.885467	1

## Sheet: 3.5_sets_used
2_variables_set_1-24	3_variablesset_25-52	4_variables_set_53-64
1 2	1 2 3	1 2 3 5
1 3	1 2 5	1 2 3 7
1 5	1 2 6	1 2 3 8
1 6	1 2 7	1 2 5 6
1 7	1 2 8	1 2 6 7
1 8	1 3 5	1 2 6 8
2 3	1 3 7	2 3 4 5
2 4	1 3 8	2 3 4 7
2 5	1 5 6	2 3 4 8
2 6	1 6 7	2 4 5 6
2 7	1 6 8	2 4 6 7
2 8	2 3 4	2 4 6 8
3 4	2 3 5
3 5	2 3 7
3 7	2 3 8
3 8	2 4 5
4 5	2 4 6
4 6	2 4 7
4 7	2 4 8
4 8	2 5 6
5 6	2 6 7
6 7	2 6 8
6 8	3 4 5
7 8	3 4 7
	3 4 8
	4 5 6
	4 6 7
	4 6 8
