# Supplementary material for: Neospongodes atlantica, a potential case of an early biological introduction in the Southwestern Atlantic
Source: PeerJ. 2022 Dec 15;10:e14347. doi: 10.7717/peerj.14347 (PMC9760029; doi:10.7717/peerj.14347)
Supplement: Supplemental Information 7 — Results of calibrations of the models, evaluation of the final models [file peerj-10-14347-s007.xlsx]

## Sheet: 4.1_calibration_results
Model	Mean_AUC_ratio	pval_pROC	Omission_rate_at_5%	AICc	delta_AICc	W_AICc	num_parameters
M_0.1_F_l_Set1	1.14578	0	0.166667	271.676	8.22912	3.32541e-07	2
M_0.1_F_l_Set10	1.13518	0	0.166667	271.618	8.17199	3.42184e-07	2
M_0.1_F_l_Set11	1.18592	0	0	270.984	7.53735	4.6998e-07	2
M_0.1_F_l_Set12	1.27353	0	0	270.859	7.41269	5.00217e-07	2
M_0.1_F_l_Set13	1.18881	0	0.166667	273.152	9.70549	1.58961e-07	2
M_0.1_F_l_Set14	1.43788	0	0	272.389	8.94251	2.32797e-07	2
M_0.1_F_l_Set15	1.23391	0	0	271.841	8.39451	3.06185e-07	2
M_0.1_F_l_Set16	1.56452	0	0	272.657	9.21029	2.03633e-07	2
M_0.1_F_l_Set17	1.2941	0	0	276.077	12.6307	3.68236e-08	2
M_0.1_F_l_Set18	1.21661	0	0	275.808	12.3617	4.21248e-08	2
M_0.1_F_l_Set19	1.22631	0	0	275.47	12.0234	4.98891e-08	2
M_0.1_F_l_Set2	1.10966	0	0.333333	273.635	10.1884	1.24879e-07	2
M_0.1_F_l_Set20	1.31119	0	0	274.554	11.1075	7.88716e-08	2
M_0.1_F_l_Set21	1.31463	0	0	274.258	10.8118	9.14408e-08	2
M_0.1_F_l_Set22	1.29045	0	0.166667	273.104	9.65742	1.62861e-07	2
M_0.1_F_l_Set23	1.40525	0	0	273.546	10.0992	1.30586e-07	2
M_0.1_F_l_Set24	1.16172	0	0.333333	275.684	12.2376	4.48277e-08	2
M_0.1_F_l_Set25	1.15143	0	0.166667	274.157	10.7107	9.61914e-08	3
M_0.1_F_l_Set26	1.26929	0	0	273.175	9.72827	1.57206e-07	3
M_0.1_F_l_Set27	1.15015	0	0.166667	274.096	10.6493	9.91926e-08	3
M_0.1_F_l_Set28	1.18908	0	0	273.628	10.1812	1.25353e-07	3
M_0.1_F_l_Set29	1.30608	0	0	273.506	10.0591	1.33245e-07	3
M_0.1_F_l_Set3	1.11059	0.01	0	276.716	13.2698	2.67591e-08	2
M_0.1_F_l_Set30	1.43535	0	0	275.037	11.5907	6.19563e-08	3
M_0.1_F_l_Set31	1.26865	0	0	274.413	10.9662	8.46642e-08	3
M_0.1_F_l_Set32	1.57388	0	0	275.325	11.8782	5.36622e-08	3
M_0.1_F_l_Set33	1.57364	0	0	275.325	11.8782	5.36633e-08	3
M_0.1_F_l_Set34	1.30626	0	0.166667	275.729	12.2828	4.38363e-08	3
M_0.1_F_l_Set35	1.40997	0	0	273.546	10.0992	1.30621e-07	2
M_0.1_F_l_Set36	1.40997	0	0	273.546	10.0992	1.30623e-07	2
M_0.1_F_l_Set37	1.39916	0	0	272.717	9.27103	1.97634e-07	3
M_0.1_F_l_Set38	1.28131	0	0	272.978	9.53189	1.73471e-07	3
M_0.1_F_l_Set39	1.50136	0	0	273.395	9.94868	1.40841e-07	3
M_0.1_F_l_Set4	1.37617	0	0	275.609	12.1629	4.65513e-08	2
M_0.1_F_l_Set40	1.27957	0	0	273.002	9.55525	1.71467e-07	3
M_0.1_F_l_Set41	1.11801	0	0.166667	271.618	8.17199	3.42419e-07	2
M_0.1_F_l_Set42	1.20171	0	0	273.544	10.0976	1.30745e-07	3
M_0.1_F_l_Set43	1.35842	0	0	273.505	10.0583	1.33343e-07	3
M_0.1_F_l_Set44	1.29013	0	0	270.505	7.05849	5.97557e-07	2
M_0.1_F_l_Set45	1.23435	0	0.166667	270.984	7.53735	4.70331e-07	2
M_0.1_F_l_Set46	1.3237	0	0	273.491	10.0447	1.34262e-07	3
M_0.1_F_l_Set47	1.44234	0	0	275.043	11.5966	6.17977e-08	3
M_0.1_F_l_Set48	1.22481	0	0	274.5	11.0541	8.10565e-08	3
M_0.1_F_l_Set49	1.56198	0	0	275.277	11.8304	5.498e-08	3
M_0.1_F_l_Set5	1.15088	0	0	276.429	12.9827	3.09039e-08	2
M_0.1_F_l_Set50	1.27541	0	0	276.791	13.3445	2.57896e-08	3
M_0.1_F_l_Set51	1.23733	0	0.166667	275.462	12.0159	5.0115e-08	3
M_0.1_F_l_Set52	1.41561	0	0	276.135	12.6883	3.58069e-08	3
M_0.1_F_l_Set53	1.38425	0	0	275.679	12.2326	4.49708e-08	4
M_0.1_F_l_Set54	1.2834	0	0	275.937	12.4907	3.95261e-08	4
M_0.1_F_l_Set55	1.44843	0	0	276.327	12.881	3.25192e-08	4
M_0.1_F_l_Set56	1.46688	0	0	276.327	12.881	3.25199e-08	4
M_0.1_F_l_Set57	1.21127	0	0.166667	273.628	10.1812	1.25435e-07	3
M_0.1_F_l_Set58	1.21277	0	0.166667	273.628	10.1812	1.25437e-07	3
M_0.1_F_l_Set59	1.3883	0	0	275.668	12.2221	4.52132e-08	4
M_0.1_F_l_Set6	1.15966	0	0.333333	275.575	12.1289	4.73691e-08	2
M_0.1_F_l_Set60	1.2044	0	0	275.936	12.4892	3.95621e-08	4
M_0.1_F_l_Set61	1.4951	0	0	276.35	12.9032	3.21642e-08	4
M_0.1_F_l_Set62	1.31921	0	0	275.958	12.5116	3.91235e-08	4
M_0.1_F_l_Set63	1.20078	0	0	273.544	10.0976	1.30806e-07	3
M_0.1_F_l_Set64	1.35571	0	0	276.392	12.9457	3.14911e-08	4
M_0.1_F_l_Set7	1.20587	0	0	272.082	8.63519	2.71772e-07	2
M_0.1_F_l_Set8	1.11018	0	0.333333	271.909	8.4626	2.96272e-07	2
M_0.1_F_l_Set9	1.25421	0	0	270.505	7.05849	5.9786e-07	2
M_0.1_F_q_Set1	1.13348	0	0.166667	271.964	8.51802	2.88187e-07	2
M_0.1_F_q_Set10	1.14215	0	0.166667	270.665	7.2188	5.5183e-07	2
M_0.1_F_q_Set11	1.18321	0	0.166667	271.212	7.76567	4.1982e-07	2
M_0.1_F_q_Set12	1.22492	0	0.166667	271.171	7.72442	4.28577e-07	2
M_0.1_F_q_Set13	1.10157	0	0	275.025	11.5782	6.24035e-08	2
M_0.1_F_q_Set14	1.38845	0	0	274.588	11.1417	7.76219e-08	2
M_0.1_F_q_Set15	1.24313	0	0	274.637	11.1908	7.57429e-08	2
M_0.1_F_q_Set16	1.49494	0	0	274.958	11.5114	6.45257e-08	2
M_0.1_F_q_Set17	1.25116	0	0	275.832	12.3852	4.16874e-08	2
M_0.1_F_q_Set18	1.11921	0	0	276.244	12.7978	3.39171e-08	2
M_0.1_F_q_Set19	1.22889	0	0	276.132	12.6858	3.58708e-08	2
M_0.1_F_q_Set2	1.06274	0	0.166667	274.912	11.4656	6.60266e-08	2
M_0.1_F_q_Set20	1.36266	0	0	275.588	12.1412	4.70984e-08	2
M_0.1_F_q_Set21	1.29786	0	0	275.634	12.1871	4.60314e-08	2
M_0.1_F_q_Set22	1.11572	0	0	275.809	12.3628	4.21603e-08	2
M_0.1_F_q_Set23	1.42332	0	0	275.515	12.0681	4.88558e-08	2
M_0.1_F_q_Set24	1.12968	0	0.333333	276.264	12.818	3.35812e-08	2
M_0.1_F_q_Set25	1.12192	0	0.166667	274.626	11.1793	7.61958e-08	3
M_0.1_F_q_Set26	1.27474	0	0.166667	272.762	9.31547	1.93495e-07	3
M_0.1_F_q_Set27	1.13384	0	0.166667	273.271	9.82467	1.50005e-07	3
M_0.1_F_q_Set28	1.17682	0	0.166667	273.79	10.3434	1.15739e-07	3
M_0.1_F_q_Set29	1.23507	0	0.166667	273.758	10.3112	1.17619e-07	3
M_0.1_F_q_Set3	1.07199	0	0.166667	276.271	12.8246	3.34732e-08	2
M_0.1_F_q_Set30	1.2314	0	0.166667	276.814	13.368	2.55107e-08	3
M_0.1_F_q_Set31	1.20333	0	0	276.981	13.5344	2.3474e-08	3
M_0.1_F_q_Set32	1.15961	0	0.166667	277.404	13.9578	1.89959e-08	3
M_0.1_F_q_Set33	1.20805	0	0.166667	277.404	13.9578	1.89963e-08	3
M_0.1_F_q_Set34	1.13148	0	0	278.192	14.7458	1.28106e-08	3
M_0.1_F_q_Set35	1.22575	0	0	277.904	14.458	1.47934e-08	3
M_0.1_F_q_Set36	1.24914	0	0	277.904	14.458	1.47937e-08	3
M_0.1_F_q_Set37	1.25583	0	0	270.339	6.89253	6.49995e-07	2
M_0.1_F_q_Set38	1.18756	0	0	273.844	10.3972	1.12689e-07	3
M_0.1_F_q_Set39	1.21509	0	0.166667	273.758	10.3113	1.17639e-07	3
M_0.1_F_q_Set4	1.10221	0	0.166667	276.201	12.7541	3.46823e-08	2
M_0.1_F_q_Set40	1.28647	0	0	272.515	9.06882	2.18963e-07	3
M_0.1_F_q_Set41	1.14692	0	0	273.192	9.74512	1.56143e-07	3
M_0.1_F_q_Set42	1.18549	0	0	273.668	10.2213	1.23063e-07	3
M_0.1_F_q_Set43	1.27412	0	0	273.774	10.3271	1.16727e-07	3
M_0.1_F_q_Set44	1.26407	0	0.166667	272.627	9.18015	2.07124e-07	3
M_0.1_F_q_Set45	1.18769	0	0.166667	273.314	9.86721	1.46908e-07	3
M_0.1_F_q_Set46	1.1905	0	0.166667	272.947	9.50019	1.76502e-07	3
M_0.1_F_q_Set47	1.42142	0	0	276.845	13.3986	2.51317e-08	3
M_0.1_F_q_Set48	1.24269	0	0	277.01	13.5637	2.31415e-08	3
M_0.1_F_q_Set49	1.28516	0	0	277.505	14.0583	1.80717e-08	3
M_0.1_F_q_Set5	1.10613	0	0.166667	276.425	12.9784	3.10101e-08	2
M_0.1_F_q_Set50	1.31682	0	0	277.572	14.1252	1.74779e-08	3
M_0.1_F_q_Set51	1.19769	0	0	277.963	14.517	1.43685e-08	3
M_0.1_F_q_Set52	1.40576	0	0	277.848	14.4012	1.52255e-08	3
M_0.1_F_q_Set53	1.24658	0	0.166667	272.762	9.31546	1.93614e-07	3
M_0.1_F_q_Set54	1.15971	0	0.166667	276.71	13.2635	2.6893e-08	4
M_0.1_F_q_Set55	1.23934	0	0.166667	276.636	13.1891	2.79124e-08	4
M_0.1_F_q_Set56	1.23268	0	0.166667	276.636	13.1891	2.7913e-08	4
M_0.1_F_q_Set57	1.16745	0	0.166667	276.207	12.7603	3.45883e-08	4
M_0.1_F_q_Set58	1.16283	0	0.166667	276.207	12.7603	3.4589e-08	4
M_0.1_F_q_Set59	1.27095	0	0	275.459	12.0125	5.02728e-08	4
M_0.1_F_q_Set6	1.10624	0	0.166667	275.932	12.486	3.96763e-08	2
M_0.1_F_q_Set60	1.18934	0	0	276.61	13.1631	2.82814e-08	4
M_0.1_F_q_Set61	1.24977	0	0	276.557	13.1106	2.90341e-08	4
M_0.1_F_q_Set62	1.28804	0	0	275.059	11.6128	6.14001e-08	4
M_0.1_F_q_Set63	1.1821	0	0	276.08	12.6334	3.68605e-08	4
M_0.1_F_q_Set64	1.23061	0	0.166667	275.652	12.2059	4.56445e-08	4
M_0.1_F_q_Set7	1.14715	0	0.166667	271.981	8.53414	2.86228e-07	2
M_0.1_F_q_Set8	1.13446	0	0.166667	271.99	8.54387	2.84845e-07	2
M_0.1_F_q_Set9	1.2659	0	0.166667	270.339	6.89252	6.50432e-07	2
M_0.1_F_p_Set1	1.23461	0.9	0	272.145	8.69885	2.63616e-07	0
M_0.1_F_p_Set10	1.19697	0	0	273.923	10.4765	1.08386e-07	1
M_0.1_F_p_Set11	1.14122	0	0	274.258	10.8112	9.16862e-08	1
M_0.1_F_p_Set12	1.15719	0	0.333333	273.754	10.3079	1.17923e-07	1
M_0.1_F_p_Set13	1.4664	0.99	0	272.236	8.78955	2.51948e-07	1
M_0.1_F_p_Set14	1.16667	0.92	0.166667	271.622	8.17544	3.4251e-07	1
M_0.1_F_p_Set15	1.18153	0.93	0.166667	271.066	7.61958	4.52257e-07	1
M_0.1_F_p_Set16	1.22863	0.88	0	273.403	9.95686	1.40559e-07	1
M_0.1_F_p_Set17	1.0904	0	0	274.282	10.8351	9.06052e-08	1
M_0.1_F_p_Set18	1.33694	0.94	0	274.083	10.637	1.00043e-07	1
M_0.1_F_p_Set19	1.11151	0.01	0	274.282	10.836	9.05696e-08	1
M_0.1_F_p_Set2	1.27112	0.89	0.166667	272.464	9.01763	2.24825e-07	1
M_0.1_F_p_Set20	1.06121	0	0	274.366	10.9191	8.68858e-08	1
M_0.1_F_p_Set21	1.2173	0	0	273.495	10.0487	1.34265e-07	1
M_0.1_F_p_Set22	1.29214	0	0	271.019	7.57278	4.63039e-07	1
M_0.1_F_p_Set23	1.37909	0	0	272.727	9.28095	1.97107e-07	1
M_0.1_F_p_Set24	1.16141	0	0.166667	274.161	10.7141	9.62736e-08	1
M_0.1_F_p_Set25	1.09384	0	0	276.52	13.0737	2.95891e-08	3
M_0.1_F_p_Set26	1.12131	0	0.166667	273.335	9.88829	1.45495e-07	2
M_0.1_F_p_Set27	1.33377	0	0	275.679	12.2321	4.50706e-08	2
M_0.1_F_p_Set28	1.16965	0	0	276.492	13.0458	3.00071e-08	2
M_0.1_F_p_Set29	1.14781	0	0.333333	278.449	15.0024	1.1281e-08	3
M_0.1_F_p_Set3	1.25976	0.95	0	272.145	8.69885	2.63733e-07	0
M_0.1_F_p_Set30	1.08768	0	0.166667	276.277	12.8302	3.34238e-08	3
M_0.1_F_p_Set31	1.1384	0	0.166667	275.82	12.3738	4.19925e-08	3
M_0.1_F_p_Set32	1.07087	0	0.166667	277.1	13.6534	2.2147e-08	3
M_0.1_F_p_Set33	1.07022	0	0.166667	277.1	13.6534	2.21474e-08	3
M_0.1_F_p_Set34	1.40408	0	0	275.003	11.5563	6.32006e-08	3
M_0.1_F_p_Set35	1.1954	0	0.166667	272.727	9.28095	1.97159e-07	1
M_0.1_F_p_Set36	1.20158	0	0.166667	272.727	9.28095	1.97163e-07	1
M_0.1_F_p_Set37	1.11943	0	0	273.517	10.0701	1.32882e-07	2
M_0.1_F_p_Set38	1.17629	0	0	272.108	8.66133	2.68777e-07	2
M_0.1_F_p_Set39	1.62289	0	0	269.638	6.19178	9.23965e-07	3
M_0.1_F_p_Set4	1.1679	0	0.166667	273.54	10.0935	1.31344e-07	1
M_0.1_F_p_Set40	1.14172	0	0.166667	276.267	12.8209	3.35883e-08	3
M_0.1_F_p_Set41	1.20851	0	0	278.235	14.7886	1.25579e-08	3
M_0.1_F_p_Set42	1.23757	0	0	275.826	12.3798	4.18772e-08	2
M_0.1_F_p_Set43	1.27553	0	0	274.723	11.2761	7.27185e-08	2
M_0.1_F_p_Set44	1.18341	0	0	273.688	10.2418	1.21973e-07	2
M_0.1_F_p_Set45	1.37057	0	0	273.03	9.58356	1.69513e-07	2
M_0.1_F_p_Set46	1.35066	0	0	277.02	13.574	2.30512e-08	3
M_0.1_F_p_Set47	1.17529	0	0.166667	275.441	11.9947	5.0776e-08	3
M_0.1_F_p_Set48	1.25153	0	0	275.824	12.3776	4.19293e-08	3
M_0.1_F_p_Set49	1.04306	0	0	277.25	13.8032	2.05563e-08	3
M_0.1_F_p_Set5	NA	1	0	274.332	10.8852	8.84281e-08	1
M_0.1_F_p_Set50	1.2656	0	0	277.798	14.352	1.56247e-08	3
M_0.1_F_p_Set51	1.28826	0	0	273.407	9.96067	1.40403e-07	2
M_0.1_F_p_Set52	1.35965	0	0	277.614	14.1674	1.71361e-08	3
M_0.1_F_p_Set53	1.11389	0	0.166667	274.96	11.5137	6.45899e-08	3
M_0.1_F_p_Set54	1.2969	0	0	277.344	13.898	1.96075e-08	4
M_0.1_F_p_Set55	1.62673	0	0	279.032	15.5852	8.43462e-09	6
M_0.1_F_p_Set56	1.63183	0	0	279.032	15.5852	8.4348e-09	6
M_0.1_F_p_Set57	1.32413	0	0.166667	280.213	16.7665	4.67257e-09	5
M_0.1_F_p_Set58	1.28836	0	0.166667	280.213	16.7665	4.67267e-09	5
M_0.1_F_p_Set59	1.14697	0	0.166667	280.224	16.7778	4.64648e-09	5
M_0.1_F_p_Set6	NA	1	0	272.145	8.69885	2.6391e-07	0
M_0.1_F_p_Set60	1.21306	0	0	280.983	17.537	3.17895e-09	5
M_0.1_F_p_Set61	1.5642	0	0	270.786	7.33935	5.20817e-07	5
M_0.1_F_p_Set62	1.17656	0	0.166667	277.652	14.2052	1.68189e-08	4
M_0.1_F_p_Set63	1.34824	0	0	275.547	12.101	4.8165e-08	3
M_0.1_F_p_Set64	1.31336	0	0	279.292	15.8455	7.40654e-09	4
M_0.1_F_p_Set7	1.25139	0.9	0.166667	271.874	8.4274	3.02311e-07	1
M_0.1_F_p_Set8	1.09449	0	0	274.28	10.8337	9.07685e-08	1
M_0.1_F_p_Set9	1.18445	0	0	271.632	8.18544	3.41204e-07	1
M_0.1_F_t_Set1	1.14795	0	0.833333	NA	NA	NA	45
M_0.1_F_t_Set10	1.16344	0	0.833333	NA	NA	NA	47
M_0.1_F_t_Set11	1.09089	0	0.833333	NA	NA	NA	41
M_0.1_F_t_Set12	1.03572	0	0.833333	NA	NA	NA	44
M_0.1_F_t_Set13	1.11721	0	0.666667	NA	NA	NA	38
M_0.1_F_t_Set14	1.04118	0	0.833333	NA	NA	NA	41
M_0.1_F_t_Set15	1.18119	0	0.666667	NA	NA	NA	43
M_0.1_F_t_Set16	1.03953	0.66	0.833333	NA	NA	NA	44
M_0.1_F_t_Set17	1.07072	0	0.833333	NA	NA	NA	43
M_0.1_F_t_Set18	1.12145	0	0.833333	NA	NA	NA	43
M_0.1_F_t_Set19	1.30612	0	0.833333	NA	NA	NA	43
M_0.1_F_t_Set2	1.19664	0	0.833333	NA	NA	NA	42
M_0.1_F_t_Set20	1.02999	0	0.833333	NA	NA	NA	41
M_0.1_F_t_Set21	1.16144	0.71	0.833333	NA	NA	NA	54
M_0.1_F_t_Set22	1.25802	0	0.833333	NA	NA	NA	46
M_0.1_F_t_Set23	1.12648	0	0.833333	NA	NA	NA	46
M_0.1_F_t_Set24	1.04301	0	0.833333	NA	NA	NA	45
M_0.1_F_t_Set25	1.17581	0	0.833333	NA	NA	NA	45
M_0.1_F_t_Set26	1.1507	0	0.833333	NA	NA	NA	56
M_0.1_F_t_Set27	1.17954	0	0.833333	NA	NA	NA	54
M_0.1_F_t_Set28	1.13181	0	0.833333	NA	NA	NA	47
M_0.1_F_t_Set29	1.09967	0	0.833333	NA	NA	NA	57
M_0.1_F_t_Set3	1.34481	0	0.833333	NA	NA	NA	51
M_0.1_F_t_Set30	1.17578	0	0.833333	NA	NA	NA	48
M_0.1_F_t_Set31	1.22427	0	0.833333	NA	NA	NA	47
M_0.1_F_t_Set32	1.05968	0	0.833333	NA	NA	NA	52
M_0.1_F_t_Set33	1.08578	0	0.833333	NA	NA	NA	52
M_0.1_F_t_Set34	1.20023	0	0.833333	NA	NA	NA	52
M_0.1_F_t_Set35	1.08955	0	0.833333	NA	NA	NA	56
M_0.1_F_t_Set36	1.09594	0	0.833333	NA	NA	NA	56
M_0.1_F_t_Set37	1.09559	0	0.833333	NA	NA	NA	46
M_0.1_F_t_Set38	1.21141	0	0.833333	NA	NA	NA	44
M_0.1_F_t_Set39	1.08219	0.67	0.833333	NA	NA	NA	51
M_0.1_F_t_Set4	1.26533	0	0.833333	NA	NA	NA	46
M_0.1_F_t_Set40	1.17924	0	0.833333	NA	NA	NA	56
M_0.1_F_t_Set41	1.16613	0	0.833333	NA	NA	NA	57
M_0.1_F_t_Set42	1.10821	0	0.833333	NA	NA	NA	52
M_0.1_F_t_Set43	1.03268	0	0.833333	NA	NA	NA	56
M_0.1_F_t_Set44	1.18381	0	0.833333	NA	NA	NA	58
M_0.1_F_t_Set45	1.16334	0	0.833333	NA	NA	NA	54
M_0.1_F_t_Set46	1.1509	0	0.833333	NA	NA	NA	60
M_0.1_F_t_Set47	1.16217	0	0.666667	NA	NA	NA	48
M_0.1_F_t_Set48	1.12279	0	0.666667	NA	NA	NA	49
M_0.1_F_t_Set49	1.03669	0	0.833333	NA	NA	NA	54
M_0.1_F_t_Set5	1.24298	0	0.833333	NA	NA	NA	41
M_0.1_F_t_Set50	1.08184	0	0.833333	NA	NA	NA	58
M_0.1_F_t_Set51	1.36557	0	0.833333	NA	NA	NA	52
M_0.1_F_t_Set52	1.17632	0	0.833333	NA	NA	NA	55
M_0.1_F_t_Set53	1.22763	0	0.833333	NA	NA	NA	61
M_0.1_F_t_Set54	1.20497	0	0.833333	NA	NA	NA	53
M_0.1_F_t_Set55	1.09538	0	0.833333	NA	NA	NA	55
M_0.1_F_t_Set56	1.1074	0	0.833333	NA	NA	NA	55
M_0.1_F_t_Set57	1.13515	0	0.833333	NA	NA	NA	61
M_0.1_F_t_Set58	1.1418	0	0.833333	NA	NA	NA	61
M_0.1_F_t_Set59	1.11372	0	0.833333	NA	NA	NA	53
M_0.1_F_t_Set6	1.09463	0	0.833333	NA	NA	NA	47
M_0.1_F_t_Set60	1.11595	0	0.833333	NA	NA	NA	50
M_0.1_F_t_Set61	1.0214	0	0.833333	NA	NA	NA	51
M_0.1_F_t_Set62	1.24617	0	0.833333	NA	NA	NA	60
M_0.1_F_t_Set63	1.15092	0	0.833333	NA	NA	NA	59
M_0.1_F_t_Set64	1.12613	0	0.833333	NA	NA	NA	71
M_0.1_F_t_Set7	1.12637	0	0.833333	NA	NA	NA	41
M_0.1_F_t_Set8	1.13163	0	0.833333	NA	NA	NA	42
M_0.1_F_t_Set9	1.11264	0	0.833333	NA	NA	NA	47
M_0.1_F_h_Set1	1.10901	0	0.333333	NA	NA	NA	31
M_0.1_F_h_Set10	1.09301	0	0.333333	NA	NA	NA	39
M_0.1_F_h_Set11	1.0957	0	0.333333	NA	NA	NA	30
M_0.1_F_h_Set12	1.08994	0	0.333333	NA	NA	NA	41
M_0.1_F_h_Set13	1.17725	0	0.333333	NA	NA	NA	44
M_0.1_F_h_Set14	1.12126	0	0.666667	NA	NA	NA	59
M_0.1_F_h_Set15	1.19171	0	0.5	NA	NA	NA	53
M_0.1_F_h_Set16	1.14745	0	0.666667	NA	NA	NA	46
M_0.1_F_h_Set17	1.124	0	0.333333	NA	NA	NA	28
M_0.1_F_h_Set18	1.16454	0	0.333333	NA	NA	NA	32
M_0.1_F_h_Set19	1.33043	0	0	NA	NA	NA	26
M_0.1_F_h_Set2	1.16182	0	0.5	NA	NA	NA	54
M_0.1_F_h_Set20	1.29777	0	0.333333	NA	NA	NA	30
M_0.1_F_h_Set21	1.07183	0	0.333333	NA	NA	NA	46
M_0.1_F_h_Set22	1.32207	0	0	NA	NA	NA	39
M_0.1_F_h_Set23	1.28997	0	0	NA	NA	NA	38
M_0.1_F_h_Set24	1.13333	0	0.5	NA	NA	NA	39
M_0.1_F_h_Set25	1.096	0	0.5	NA	NA	NA	58
M_0.1_F_h_Set26	1.12418	0	0.5	NA	NA	NA	50
M_0.1_F_h_Set27	1.14038	0	0.166667	NA	NA	NA	45
M_0.1_F_h_Set28	1.16717	0	0.333333	NA	NA	NA	40
M_0.1_F_h_Set29	1.12085	0	0.666667	NA	NA	NA	50
M_0.1_F_h_Set3	1.20038	0	0.5	NA	NA	NA	36
M_0.1_F_h_Set30	1.1923	0	0.5	NA	NA	NA	67
M_0.1_F_h_Set31	1.18078	0	0.5	NA	NA	NA	57
M_0.1_F_h_Set32	1.15749	0	0.666667	NA	NA	NA	63
M_0.1_F_h_Set33	1.16651	0	0.666667	NA	NA	NA	63
M_0.1_F_h_Set34	1.30965	0	0.166667	NA	NA	NA	57
M_0.1_F_h_Set35	1.1774	0	0.166667	NA	NA	NA	45
M_0.1_F_h_Set36	1.14229	0	0.166667	NA	NA	NA	45
M_0.1_F_h_Set37	1.1204	0	0.5	NA	NA	NA	64
M_0.1_F_h_Set38	1.18046	0	0.5	NA	NA	NA	62
M_0.1_F_h_Set39	1.08818	0	0.666667	NA	NA	NA	78
M_0.1_F_h_Set4	1.24021	0	0.166667	NA	NA	NA	42
M_0.1_F_h_Set40	1.13961	0	0.333333	NA	NA	NA	37
M_0.1_F_h_Set41	1.13732	0	0.166667	NA	NA	NA	45
M_0.1_F_h_Set42	1.18	0	0.166667	NA	NA	NA	32
M_0.1_F_h_Set43	1.14385	0	0.5	NA	NA	NA	37
M_0.1_F_h_Set44	1.15356	0	0.333333	NA	NA	NA	48
M_0.1_F_h_Set45	1.13548	0	0.333333	NA	NA	NA	47
M_0.1_F_h_Set46	1.09812	0	0.166667	NA	NA	NA	52
M_0.1_F_h_Set47	1.2157	0	0.5	NA	NA	NA	61
M_0.1_F_h_Set48	1.17645	0	0.333333	NA	NA	NA	65
M_0.1_F_h_Set49	1.19196	0	0.5	NA	NA	NA	49
M_0.1_F_h_Set5	1.18209	0	0.333333	NA	NA	NA	42
M_0.1_F_h_Set50	1.10466	0	0.333333	NA	NA	NA	44
M_0.1_F_h_Set51	1.3709	0	0	NA	NA	NA	41
M_0.1_F_h_Set52	1.32226	0	0.333333	NA	NA	NA	49
M_0.1_F_h_Set53	1.11628	0	0.5	NA	NA	NA	67
M_0.1_F_h_Set54	1.09285	0	0.5	NA	NA	NA	70
M_0.1_F_h_Set55	1.09601	0	0.666667	NA	NA	NA	69
M_0.1_F_h_Set56	1.11845	0	0.666667	NA	NA	NA	69
M_0.1_F_h_Set57	1.1497	0	0.166667	NA	NA	NA	58
M_0.1_F_h_Set58	1.1981	0	0.166667	NA	NA	NA	58
M_0.1_F_h_Set59	1.11127	0	0.5	NA	NA	NA	67
M_0.1_F_h_Set6	1.14179	0	0.666667	NA	NA	NA	44
M_0.1_F_h_Set60	1.15542	0	0.333333	NA	NA	NA	77
M_0.1_F_h_Set61	1.10558	0	0.5	NA	NA	NA	61
M_0.1_F_h_Set62	1.08211	0	0.333333	NA	NA	NA	51
M_0.1_F_h_Set63	1.19502	0	0.166667	NA	NA	NA	46
M_0.1_F_h_Set64	1.14502	0	0.333333	NA	NA	NA	50
M_0.1_F_h_Set7	1.11623	0	0.5	NA	NA	NA	54
M_0.1_F_h_Set8	1.15976	0	0.166667	NA	NA	NA	23
M_0.1_F_h_Set9	1.11616	0	0.5	NA	NA	NA	34
M_0.1_F_lq_Set1	1.26153	0	0	271.224	7.77774	4.18361e-07	3
M_0.1_F_lq_Set10	1.14307	0	0.166667	272.748	9.30125	1.95315e-07	3
M_0.1_F_lq_Set11	1.18611	0	0	272.124	8.67763	2.66784e-07	3
M_0.1_F_lq_Set12	1.23773	0	0	273.276	9.82956	1.4998e-07	3
M_0.1_F_lq_Set13	1.30518	0	0	263.529	0.0829972	1.96097e-05	4
M_0.1_F_lq_Set14	1.43172	0	0	269.666	6.21978	9.1179e-07	3
M_0.1_F_lq_Set15	1.17844	0	0	266.515	3.06861	4.40726e-06	3
M_0.1_F_lq_Set16	1.56215	0	0	269.349	5.90267	1.06849e-06	4
M_0.1_F_lq_Set17	1.26554	0	0	275.82	12.374	4.20292e-08	2
M_0.1_F_lq_Set18	1.38504	0	0	277.432	13.986	1.87719e-08	4
M_0.1_F_lq_Set19	1.36257	0	0	272.305	8.85809	2.43801e-07	4
M_0.1_F_lq_Set2	1.258	0	0	271.001	7.55421	4.67926e-07	4
M_0.1_F_lq_Set20	1.26103	0	0	278.949	15.5029	8.79327e-09	4
M_0.1_F_lq_Set21	1.32778	0	0	275.832	12.3858	4.17863e-08	3
M_0.1_F_lq_Set22	1.2981	0	0	274.581	11.1348	7.81062e-08	4
M_0.1_F_lq_Set23	1.33006	0	0	275.66	12.2139	4.5539e-08	4
M_0.1_F_lq_Set24	1.34725	0	0	272.539	9.09289	2.16821e-07	3
M_0.1_F_lq_Set25	1.25221	0	0	270.458	7.01201	6.13714e-07	5
M_0.1_F_lq_Set26	1.24838	0	0	271.226	7.77912	4.18216e-07	3
M_0.1_F_lq_Set27	1.28346	0	0	275.694	12.2476	4.47808e-08	5
M_0.1_F_lq_Set28	1.2942	0	0	272.579	9.13261	2.12574e-07	4
M_0.1_F_lq_Set29	1.24015	0	0	274.117	10.671	9.85051e-08	4
M_0.1_F_lq_Set3	1.10549	0	0.166667	280.685	17.2389	3.69215e-09	4
M_0.1_F_lq_Set30	1.25594	0	0	273.783	10.3365	1.16445e-07	5
M_0.1_F_lq_Set31	1.27686	0	0	272.293	8.84685	2.45244e-07	5
M_0.1_F_lq_Set32	1.40616	0	0	275.312	11.8654	5.42176e-08	6
M_0.1_F_lq_Set33	1.40859	0	0	275.312	11.8654	5.42187e-08	6
M_0.1_F_lq_Set34	1.20943	0	0	280.754	17.308	3.56697e-09	6
M_0.1_F_lq_Set35	1.20116	0	0	282.093	18.6465	1.82669e-09	6
M_0.1_F_lq_Set36	1.19611	0	0	282.093	18.6465	1.82673e-09	6
M_0.1_F_lq_Set37	1.57117	0	0	269.255	5.80817	1.12071e-06	4
M_0.1_F_lq_Set38	1.22979	0	0	268.196	4.74939	1.90288e-06	4
M_0.1_F_lq_Set39	1.56443	0	0	272.181	8.73455	2.5945e-07	5
M_0.1_F_lq_Set4	1.19807	0	0	276.477	13.0303	3.02862e-08	4
M_0.1_F_lq_Set40	1.28163	0	0	275.179	11.7324	5.79552e-08	4
M_0.1_F_lq_Set41	1.20342	0	0	277.109	13.6629	2.20751e-08	5
M_0.1_F_lq_Set42	1.20113	0	0	275.788	12.3419	4.27337e-08	5
M_0.1_F_lq_Set43	1.28411	0	0	278.812	15.3655	9.42342e-09	5
M_0.1_F_lq_Set44	1.29424	0	0	274.158	10.7118	9.6549e-08	4
M_0.1_F_lq_Set45	1.27405	0	0.166667	276.422	12.9755	3.11323e-08	5
M_0.1_F_lq_Set46	1.29081	0	0	277.385	13.9388	1.92326e-08	5
M_0.1_F_lq_Set47	1.47725	0	0	266.311	2.86453	4.88415e-06	5
M_0.1_F_lq_Set48	1.31814	0	0	267.067	3.62014	3.34748e-06	5
M_0.1_F_lq_Set49	1.51106	0	0	269.875	6.42812	8.22208e-07	6
M_0.1_F_lq_Set5	1.34054	0	0	274.092	10.6459	9.97981e-08	4
M_0.1_F_lq_Set50	1.33192	0	0	280.224	16.7771	4.65325e-09	5
M_0.1_F_lq_Set51	1.30613	0	0	278.243	14.7963	1.25282e-08	6
M_0.1_F_lq_Set52	1.33858	0	0	281.62	18.1734	2.31511e-09	6
M_0.1_F_lq_Set53	1.26346	0	0	272.887	9.4405	1.82346e-07	6
M_0.1_F_lq_Set54	1.26738	0	0	273.925	10.4781	1.08539e-07	6
M_0.1_F_lq_Set55	1.28545	0	0	272.453	9.00641	2.26556e-07	6
M_0.1_F_lq_Set56	1.26645	0	0	272.453	9.00641	2.2656e-07	6
M_0.1_F_lq_Set57	1.28253	0	0	282.515	19.0687	1.47974e-09	7
M_0.1_F_lq_Set58	1.29409	0	0	282.515	19.0687	1.47977e-09	7
M_0.1_F_lq_Set59	1.54505	0	0	272.973	9.52683	1.74664e-07	7
M_0.1_F_lq_Set6	1.14112	0	0.333333	277.375	13.9286	1.93368e-08	3
M_0.1_F_lq_Set60	1.29335	0	0	270.459	7.01304	6.13878e-07	6
M_0.1_F_lq_Set61	1.51039	0	0	273.345	9.89864	1.45042e-07	7
M_0.1_F_lq_Set62	1.3081	0	0	280.104	16.6575	4.94113e-09	6
M_0.1_F_lq_Set63	1.22711	0	0.166667	281.568	18.1214	2.37657e-09	7
M_0.1_F_lq_Set64	1.30524	0	0	284.278	20.8315	6.13029e-10	7
M_0.1_F_lq_Set7	1.19075	0	0	274.225	10.7784	9.34295e-08	3
M_0.1_F_lq_Set8	1.19803	0	0	272.856	9.40971	1.85228e-07	3
M_0.1_F_lq_Set9	1.24419	0	0.166667	270.326	6.87934	6.56412e-07	2
M_0.1_F_lp_Set1	1.14895	0	0.166667	271.678	8.23107	3.33935e-07	2
M_0.1_F_lp_Set10	1.13912	0	0.166667	271.645	8.19891	3.39354e-07	2
M_0.1_F_lp_Set11	1.19176	0	0	270.954	7.5075	4.79513e-07	2
M_0.1_F_lp_Set12	1.29445	0	0	270.669	7.22258	5.52941e-07	2
M_0.1_F_lp_Set13	1.14818	0	0.166667	275.427	11.9808	5.12211e-08	3
M_0.1_F_lp_Set14	1.45858	0	0	275.095	11.6487	6.04757e-08	3
M_0.1_F_lp_Set15	1.20789	0	0	271.852	8.40545	3.06089e-07	2
M_0.1_F_lp_Set16	1.59918	0	0	270.287	6.84024	6.69481e-07	3
M_0.1_F_lp_Set17	1.27124	0	0	276.089	12.6421	3.68032e-08	2
M_0.1_F_lp_Set18	1.24436	0	0	277.855	14.4087	1.52155e-08	3
M_0.1_F_lp_Set19	1.23588	0	0	275.444	11.9978	5.07933e-08	2
M_0.1_F_lp_Set2	1.10063	0	0.333333	276.288	12.8411	3.332e-08	3
M_0.1_F_lp_Set20	1.27921	0	0	274.569	11.1224	7.86889e-08	2
M_0.1_F_lp_Set21	1.32725	0	0	274.243	10.7967	9.26085e-08	2
M_0.1_F_lp_Set22	1.3067	0	0	275.49	12.0432	4.96575e-08	3
M_0.1_F_lp_Set23	1.41911	0	0	276.005	12.5588	3.83745e-08	3
M_0.1_F_lp_Set24	1.34795	0	0	276.187	12.7401	3.50492e-08	3
M_0.1_F_lp_Set25	1.19025	0	0.166667	279.73	16.2832	5.96084e-09	5
M_0.1_F_lp_Set26	1.28734	0	0	273.205	9.75882	1.55623e-07	3
M_0.1_F_lp_Set27	1.22378	0	0.166667	273.45	10.0034	1.37711e-07	3
M_0.1_F_lp_Set28	1.18261	0	0	273.604	10.1571	1.27528e-07	3
M_0.1_F_lp_Set29	1.22117	0	0	273.328	9.88152	1.46371e-07	3
M_0.1_F_lp_Set3	1.11679	0	0	274.325	10.8789	8.88976e-08	1
M_0.1_F_lp_Set30	1.41644	0	0	278.015	14.5691	1.40472e-08	4
M_0.1_F_lp_Set31	1.27323	0	0	277.325	13.8781	1.98447e-08	4
M_0.1_F_lp_Set32	1.60405	0	0	274.136	10.6898	9.77174e-08	5
M_0.1_F_lp_Set33	1.62726	0	0	274.136	10.6898	9.77194e-08	5
M_0.1_F_lp_Set34	1.3107	0	0.166667	277.005	13.5584	2.3286e-08	4
M_0.1_F_lp_Set35	1.21078	0	0	285.637	22.1906	3.10911e-10	6
M_0.1_F_lp_Set36	1.19753	0	0	285.637	22.1906	3.10918e-10	6
M_0.1_F_lp_Set37	1.4147	0	0	272.592	9.146	2.11471e-07	3
M_0.1_F_lp_Set38	1.28506	0	0	275.756	12.3091	4.34908e-08	4
M_0.1_F_lp_Set39	1.56558	0	0	271.507	8.06079	3.63848e-07	4
M_0.1_F_lp_Set4	1.3432	0	0	277.997	14.551	1.41774e-08	3
M_0.1_F_lp_Set40	1.25457	0	0	273.032	9.58532	1.69781e-07	3
M_0.1_F_lp_Set41	1.22531	0	0.166667	275.667	12.2209	4.5455e-08	4
M_0.1_F_lp_Set42	1.19964	0	0	273.473	10.0268	1.36159e-07	3
M_0.1_F_lp_Set43	1.36586	0	0	273.288	9.84201	1.49341e-07	3
M_0.1_F_lp_Set44	1.27536	0	0	270.537	7.09084	5.9101e-07	2
M_0.1_F_lp_Set45	1.30108	0	0.166667	275.954	12.5078	3.9385e-08	4
M_0.1_F_lp_Set46	1.36473	0	0	275.504	12.0581	4.93168e-08	4
M_0.1_F_lp_Set47	1.4332	0	0	274.794	11.3474	7.03607e-08	3
M_0.1_F_lp_Set48	1.22594	0	0	279.843	16.3964	5.63571e-09	5
M_0.1_F_lp_Set49	1.49718	0	0	269.293	5.84672	1.10102e-06	5
M_0.1_F_lp_Set5	1.17242	0	0	278.043	14.5968	1.38599e-08	3
M_0.1_F_lp_Set50	1.28816	0	0	279.474	16.0279	6.77647e-09	4
M_0.1_F_lp_Set51	1.29937	0	0	278.254	14.8078	1.24725e-08	4
M_0.1_F_lp_Set52	1.3667	0	0	281.376	17.9291	2.61918e-09	5
M_0.1_F_lp_Set53	1.51792	0	0	272.412	8.96575	2.31501e-07	3
M_0.1_F_lp_Set54	1.26588	0	0	275.596	12.1501	4.71083e-08	4
M_0.1_F_lp_Set55	1.42793	0	0	274.864	11.4179	6.79356e-08	6
M_0.1_F_lp_Set56	1.41903	0	0	274.864	11.4179	6.7937e-08	6
M_0.1_F_lp_Set57	1.27497	0	0.166667	279.263	15.8167	7.53203e-09	5
M_0.1_F_lp_Set58	1.3013	0	0.166667	279.263	15.8167	7.53218e-09	5
M_0.1_F_lp_Set59	1.32075	0	0	274.048	10.6013	1.02199e-07	4
M_0.1_F_lp_Set6	1.15543	0	0.333333	275.513	12.0671	4.91106e-08	2
M_0.1_F_lp_Set60	1.20386	0	0	278.021	14.5744	1.40191e-08	5
M_0.1_F_lp_Set61	1.46489	0	0	270.954	7.50801	4.79928e-07	6
M_0.1_F_lp_Set62	1.31617	0	0	278.262	14.8154	1.24282e-08	5
M_0.1_F_lp_Set63	1.24313	0	0.166667	282.357	18.9109	1.60356e-09	6
M_0.1_F_lp_Set64	1.35703	0	0	276.748	13.3015	2.64943e-08	5
M_0.1_F_lp_Set7	1.20295	0	0	272.039	8.59306	2.78995e-07	2
M_0.1_F_lp_Set8	1.11913	0	0.333333	271.928	8.48122	2.95046e-07	2
M_0.1_F_lp_Set9	1.28395	0	0.166667	270.537	7.09084	5.9131e-07	2
M_0.1_F_lt_Set1	1.1723	0	0.833333	NA	NA	NA	46
M_0.1_F_lt_Set10	1.1594	0	0.833333	NA	NA	NA	50
M_0.1_F_lt_Set11	1.10484	0	0.833333	NA	NA	NA	41
M_0.1_F_lt_Set12	1.04271	0	0.833333	NA	NA	NA	44
M_0.1_F_lt_Set13	1.08395	0	0.666667	NA	NA	NA	38
M_0.1_F_lt_Set14	1.04423	0	0.833333	NA	NA	NA	41
M_0.1_F_lt_Set15	1.17233	0	0.666667	NA	NA	NA	43
M_0.1_F_lt_Set16	1.06403	0.55	0.833333	NA	NA	NA	44
M_0.1_F_lt_Set17	1.07052	0	0.833333	NA	NA	NA	43
M_0.1_F_lt_Set18	1.10697	0	0.833333	NA	NA	NA	43
M_0.1_F_lt_Set19	1.30867	0	0.833333	NA	NA	NA	44
M_0.1_F_lt_Set2	1.16747	0	0.833333	NA	NA	NA	42
M_0.1_F_lt_Set20	1.02981	0	0.833333	NA	NA	NA	41
M_0.1_F_lt_Set21	1.12108	0.66	0.833333	NA	NA	NA	54
M_0.1_F_lt_Set22	1.27415	0	0.833333	NA	NA	NA	46
M_0.1_F_lt_Set23	1.1328	0	0.833333	NA	NA	NA	46
M_0.1_F_lt_Set24	1.03952	0	0.833333	NA	NA	NA	45
M_0.1_F_lt_Set25	1.17822	0	0.833333	NA	NA	NA	45
M_0.1_F_lt_Set26	1.15549	0	0.833333	NA	NA	NA	58
M_0.1_F_lt_Set27	1.19786	0	0.833333	NA	NA	NA	55
M_0.1_F_lt_Set28	1.11283	0	0.833333	NA	NA	NA	47
M_0.1_F_lt_Set29	1.09206	0	0.833333	NA	NA	NA	57
M_0.1_F_lt_Set3	1.32953	0	0.833333	NA	NA	NA	50
M_0.1_F_lt_Set30	1.18923	0	0.833333	NA	NA	NA	48
M_0.1_F_lt_Set31	1.18918	0	0.833333	NA	NA	NA	47
M_0.1_F_lt_Set32	1.04436	0	0.833333	NA	NA	NA	52
M_0.1_F_lt_Set33	1.0688	0	0.833333	NA	NA	NA	52
M_0.1_F_lt_Set34	1.23206	0	0.833333	NA	NA	NA	52
M_0.1_F_lt_Set35	1.09447	0	0.833333	NA	NA	NA	56
M_0.1_F_lt_Set36	1.10797	0	0.833333	NA	NA	NA	56
M_0.1_F_lt_Set37	1.12562	0	0.833333	NA	NA	NA	47
M_0.1_F_lt_Set38	1.21226	0	0.833333	NA	NA	NA	44
M_0.1_F_lt_Set39	1.08368	0.64	0.833333	NA	NA	NA	53
M_0.1_F_lt_Set4	1.30016	0	0.833333	NA	NA	NA	47
M_0.1_F_lt_Set40	1.15513	0	0.833333	NA	NA	NA	56
M_0.1_F_lt_Set41	1.14818	0	0.833333	NA	NA	NA	57
M_0.1_F_lt_Set42	1.1046	0	0.833333	NA	NA	NA	52
M_0.1_F_lt_Set43	1.02902	0	0.833333	NA	NA	NA	56
M_0.1_F_lt_Set44	1.20992	0	0.833333	NA	NA	NA	58
M_0.1_F_lt_Set45	1.19812	0	0.833333	NA	NA	NA	54
M_0.1_F_lt_Set46	1.1592	0	0.833333	NA	NA	NA	60
M_0.1_F_lt_Set47	1.12561	0	0.666667	NA	NA	NA	48
M_0.1_F_lt_Set48	1.10965	0	0.666667	NA	NA	NA	49
M_0.1_F_lt_Set49	1.0396	0	0.833333	NA	NA	NA	54
M_0.1_F_lt_Set5	1.25419	0	0.833333	NA	NA	NA	44
M_0.1_F_lt_Set50	1.06561	0	0.833333	NA	NA	NA	58
M_0.1_F_lt_Set51	1.36494	0	0.833333	NA	NA	NA	52
M_0.1_F_lt_Set52	1.17864	0	0.833333	NA	NA	NA	55
M_0.1_F_lt_Set53	1.21179	0	0.833333	NA	NA	NA	61
M_0.1_F_lt_Set54	1.22004	0	0.833333	NA	NA	NA	53
M_0.1_F_lt_Set55	1.08682	0	0.833333	NA	NA	NA	55
M_0.1_F_lt_Set56	1.10087	0	0.833333	NA	NA	NA	55
M_0.1_F_lt_Set57	1.12024	0	0.833333	NA	NA	NA	61
M_0.1_F_lt_Set58	1.13673	0	0.833333	NA	NA	NA	61
M_0.1_F_lt_Set59	1.13218	0	0.833333	NA	NA	NA	53
M_0.1_F_lt_Set6	1.07197	0	0.833333	NA	NA	NA	48
M_0.1_F_lt_Set60	1.14068	0	0.833333	NA	NA	NA	50
M_0.1_F_lt_Set61	1.02311	0	0.833333	NA	NA	NA	51
M_0.1_F_lt_Set62	1.23927	0	0.833333	NA	NA	NA	60
M_0.1_F_lt_Set63	1.13249	0	0.833333	NA	NA	NA	59
M_0.1_F_lt_Set64	1.11205	0	0.833333	NA	NA	NA	71
M_0.1_F_lt_Set7	1.12348	0	0.833333	NA	NA	NA	43
M_0.1_F_lt_Set8	1.13269	0	0.833333	NA	NA	NA	42
M_0.1_F_lt_Set9	1.11344	0	0.833333	NA	NA	NA	47
M_0.1_F_lh_Set1	1.10489	0	0.333333	NA	NA	NA	31
M_0.1_F_lh_Set10	1.1013	0	0.333333	NA	NA	NA	39
M_0.1_F_lh_Set11	1.11119	0	0.333333	NA	NA	NA	30
M_0.1_F_lh_Set12	1.0839	0	0.333333	NA	NA	NA	41
M_0.1_F_lh_Set13	1.14262	0	0.333333	NA	NA	NA	44
M_0.1_F_lh_Set14	1.10692	0	0.666667	NA	NA	NA	57
M_0.1_F_lh_Set15	1.25745	0	0.5	NA	NA	NA	53
M_0.1_F_lh_Set16	1.15619	0	0.666667	NA	NA	NA	46
M_0.1_F_lh_Set17	1.12506	0	0.333333	NA	NA	NA	28
M_0.1_F_lh_Set18	1.16754	0	0.333333	NA	NA	NA	35
M_0.1_F_lh_Set19	1.32843	0	0	NA	NA	NA	27
M_0.1_F_lh_Set2	1.15642	0	0.5	NA	NA	NA	54
M_0.1_F_lh_Set20	1.29949	0	0.333333	NA	NA	NA	32
M_0.1_F_lh_Set21	1.0727	0	0.333333	NA	NA	NA	46
M_0.1_F_lh_Set22	1.34101	0	0	NA	NA	NA	39
M_0.1_F_lh_Set23	1.28516	0	0	NA	NA	NA	38
M_0.1_F_lh_Set24	1.1375	0	0.5	NA	NA	NA	39
M_0.1_F_lh_Set25	1.09963	0	0.5	NA	NA	NA	58
M_0.1_F_lh_Set26	1.13491	0	0.5	NA	NA	NA	50
M_0.1_F_lh_Set27	1.11571	0	0.166667	NA	NA	NA	45
M_0.1_F_lh_Set28	1.13331	0	0.333333	NA	NA	NA	40
M_0.1_F_lh_Set29	1.14049	0	0.666667	NA	NA	NA	50
M_0.1_F_lh_Set3	1.1935	0	0.5	NA	NA	NA	36
M_0.1_F_lh_Set30	1.24231	0	0.5	NA	NA	NA	67
M_0.1_F_lh_Set31	1.19504	0	0.5	NA	NA	NA	57
M_0.1_F_lh_Set32	1.17623	0	0.666667	NA	NA	NA	63
M_0.1_F_lh_Set33	1.18048	0	0.666667	NA	NA	NA	63
M_0.1_F_lh_Set34	1.28196	0	0.166667	NA	NA	NA	60
M_0.1_F_lh_Set35	1.18181	0	0.166667	NA	NA	NA	45
M_0.1_F_lh_Set36	1.16934	0	0.166667	NA	NA	NA	45
M_0.1_F_lh_Set37	1.11838	0	0.5	NA	NA	NA	69
M_0.1_F_lh_Set38	1.16794	0	0.5	NA	NA	NA	62
M_0.1_F_lh_Set39	1.07754	0	0.666667	NA	NA	NA	78
M_0.1_F_lh_Set4	1.21902	0	0.166667	NA	NA	NA	37
M_0.1_F_lh_Set40	1.16212	0	0.333333	NA	NA	NA	37
M_0.1_F_lh_Set41	1.13319	0	0.166667	NA	NA	NA	45
M_0.1_F_lh_Set42	1.18175	0	0.166667	NA	NA	NA	32
M_0.1_F_lh_Set43	1.12113	0	0.5	NA	NA	NA	37
M_0.1_F_lh_Set44	1.1388	0	0.333333	NA	NA	NA	51
M_0.1_F_lh_Set45	1.11607	0	0.333333	NA	NA	NA	47
M_0.1_F_lh_Set46	1.10165	0	0.166667	NA	NA	NA	52
M_0.1_F_lh_Set47	1.19272	0	0.5	NA	NA	NA	64
M_0.1_F_lh_Set48	1.1596	0	0.333333	NA	NA	NA	66
M_0.1_F_lh_Set49	1.1726	0	0.5	NA	NA	NA	47
M_0.1_F_lh_Set5	1.18501	0	0.333333	NA	NA	NA	42
M_0.1_F_lh_Set50	1.09695	0	0.333333	NA	NA	NA	44
M_0.1_F_lh_Set51	1.38705	0	0	NA	NA	NA	38
M_0.1_F_lh_Set52	1.32247	0	0.333333	NA	NA	NA	49
M_0.1_F_lh_Set53	1.13474	0	0.5	NA	NA	NA	67
M_0.1_F_lh_Set54	1.13497	0	0.5	NA	NA	NA	70
M_0.1_F_lh_Set55	1.10204	0	0.666667	NA	NA	NA	69
M_0.1_F_lh_Set56	1.10704	0	0.666667	NA	NA	NA	69
M_0.1_F_lh_Set57	1.20405	0	0.166667	NA	NA	NA	66
M_0.1_F_lh_Set58	1.18715	0	0.166667	NA	NA	NA	66
M_0.1_F_lh_Set59	1.14742	0	0.5	NA	NA	NA	67
M_0.1_F_lh_Set6	1.12424	0	0.666667	NA	NA	NA	41
M_0.1_F_lh_Set60	1.13903	0	0.333333	NA	NA	NA	77
M_0.1_F_lh_Set61	1.11105	0	0.5	NA	NA	NA	61
M_0.1_F_lh_Set62	1.08235	0	0.333333	NA	NA	NA	51
M_0.1_F_lh_Set63	1.20574	0	0.166667	NA	NA	NA	46
M_0.1_F_lh_Set64	1.16181	0	0.333333	NA	NA	NA	50
M_0.1_F_lh_Set7	1.12916	0	0.5	NA	NA	NA	54
M_0.1_F_lh_Set8	1.16359	0	0.166667	NA	NA	NA	23
M_0.1_F_lh_Set9	1.12249	0	0.5	NA	NA	NA	34
M_0.1_F_qp_Set1	1.25741	0	0	271.173	7.72672	4.30273e-07	3
M_0.1_F_qp_Set10	1.14576	0	0.166667	273.072	9.62558	1.66503e-07	3
M_0.1_F_qp_Set11	1.19532	0	0	273.48	10.0336	1.35777e-07	3
M_0.1_F_qp_Set12	1.24706	0	0	273.034	9.58723	1.69733e-07	3
M_0.1_F_qp_Set13	1.0771	0	0	276.737	13.2909	2.66404e-08	3
M_0.1_F_qp_Set14	1.43025	0	0	270.402	6.95585	6.32675e-07	3
M_0.1_F_qp_Set15	1.127	0	0.333333	274.032	10.5856	1.03036e-07	3
M_0.1_F_qp_Set16	1.37948	0	0	276.917	13.4709	2.43488e-08	3
M_0.1_F_qp_Set17	1.29894	0	0	275.857	12.4104	4.13787e-08	2
M_0.1_F_qp_Set18	1.26373	0	0	277.48	14.0334	1.83798e-08	3
M_0.1_F_qp_Set19	1.22593	0	0	276.143	12.6961	3.58709e-08	2
M_0.1_F_qp_Set2	1.12791	0	0	277.098	13.6516	2.22468e-08	3
M_0.1_F_qp_Set20	1.37732	0	0	277.702	14.256	1.64453e-08	3
M_0.1_F_qp_Set21	1.31265	0	0	276.197	12.7505	3.49104e-08	3
M_0.1_F_qp_Set22	1.30101	0	0	275.806	12.3599	4.2442e-08	3
M_0.1_F_qp_Set23	1.33126	0	0	275.141	11.6947	5.91895e-08	2
M_0.1_F_qp_Set24	1.16086	0	0.333333	278.95	15.504	8.81207e-09	3
M_0.1_F_qp_Set25	1.25359	0	0	271.488	8.04132	3.67774e-07	5
M_0.1_F_qp_Set26	1.25022	0	0	271.173	7.72663	4.30452e-07	3
M_0.1_F_qp_Set27	1.348	0	0	278.407	14.9602	1.15659e-08	6
M_0.1_F_qp_Set28	1.27631	0	0	272.636	9.18906	2.07195e-07	4
M_0.1_F_qp_Set29	1.25616	0	0	276.115	12.669	3.63679e-08	5
M_0.1_F_qp_Set3	1.09564	0	0.333333	277.883	14.4364	1.50294e-08	3
M_0.1_F_qp_Set30	1.2634	0	0	276.56	13.1131	2.91274e-08	6
M_0.1_F_qp_Set31	1.29693	0	0	276.07	12.6232	3.7214e-08	5
M_0.1_F_qp_Set32	1.28831	0	0	283.457	20.0109	9.25757e-10	6
M_0.1_F_qp_Set33	1.26669	0	0	283.457	20.0109	9.25776e-10	6
M_0.1_F_qp_Set34	1.33309	0	0.166667	281.47	18.0238	2.50032e-09	6
M_0.1_F_qp_Set35	1.47248	0	0	285.285	21.8388	3.71189e-10	6
M_0.1_F_qp_Set36	1.47404	0	0	285.285	21.8388	3.71196e-10	6
M_0.1_F_qp_Set37	1.58547	0	0	269.799	6.35264	8.55833e-07	4
M_0.1_F_qp_Set38	1.22573	0	0	272.623	9.17618	2.0858e-07	5
M_0.1_F_qp_Set39	1.57087	0	0	270.605	7.15859	5.72e-07	5
M_0.1_F_qp_Set4	1.19424	0	0.166667	277.866	14.4195	1.51606e-08	3
M_0.1_F_qp_Set40	1.27128	0	0	275.37	11.9235	5.28121e-08	4
M_0.1_F_qp_Set41	1.25363	0	0.166667	277.899	14.4526	1.49128e-08	5
M_0.1_F_qp_Set42	1.18986	0	0	278.926	15.4794	8.92477e-09	5
M_0.1_F_qp_Set43	1.34711	0	0	277.235	13.7891	2.07804e-08	5
M_0.1_F_qp_Set44	1.27084	0	0	274.526	11.0794	8.05469e-08	4
M_0.1_F_qp_Set45	1.3051	0	0.166667	274.79	11.3438	7.0575e-08	4
M_0.1_F_qp_Set46	1.36335	0	0	280.034	16.5875	5.12859e-09	6
M_0.1_F_qp_Set47	1.45	0	0	272.268	8.8215	2.49103e-07	6
M_0.1_F_qp_Set48	1.17327	0	0.333333	278.561	15.1141	1.07143e-08	5
M_0.1_F_qp_Set49	1.2916	0	0	278.007	14.5603	1.41331e-08	6
M_0.1_F_qp_Set5	1.05661	0	0.333333	278.175	14.7288	1.2991e-08	3
M_0.1_F_qp_Set50	1.27729	0	0	285.034	21.5873	4.21062e-10	6
M_0.1_F_qp_Set51	1.33311	0	0	277.93	14.4831	1.46903e-08	4
M_0.1_F_qp_Set52	1.38554	0	0	280.685	17.2384	3.70455e-09	5
M_0.1_F_qp_Set53	1.25443	0	0	278.284	14.8376	1.23043e-08	7
M_0.1_F_qp_Set54	1.26522	0	0	283.927	20.4808	7.32244e-10	8
M_0.1_F_qp_Set55	1.29752	0	0	285.18	21.7338	3.91372e-10	9
M_0.1_F_qp_Set56	1.31303	0	0	285.18	21.7338	3.9138e-10	9
M_0.1_F_qp_Set57	1.31338	0	0	281.835	18.3882	2.08493e-09	7
M_0.1_F_qp_Set58	1.31622	0	0	281.835	18.3882	2.08497e-09	7
M_0.1_F_qp_Set59	1.41148	0	0	279.312	15.866	7.35877e-09	8
M_0.1_F_qp_Set6	1.16176	0	0.166667	278.189	14.7425	1.29058e-08	3
M_0.1_F_qp_Set60	1.2387	0	0	276.588	13.1411	2.87427e-08	7
M_0.1_F_qp_Set61	1.4062	0	0	283.688	20.2417	8.25401e-10	9
M_0.1_F_qp_Set62	1.28655	0	0	277.316	13.8698	1.99663e-08	5
M_0.1_F_qp_Set63	1.23655	0	0.166667	284.89	21.4435	4.52594e-10	7
M_0.1_F_qp_Set64	1.32372	0	0	293.912	30.4659	4.97201e-12	9
M_0.1_F_qp_Set7	1.19932	0	0	274.185	10.7385	9.55628e-08	3
M_0.1_F_qp_Set8	1.18067	0	0	272.952	9.50598	1.76984e-07	3
M_0.1_F_qp_Set9	1.26125	0	0.166667	270.386	6.93996	6.38479e-07	2
M_0.1_F_qt_Set1	1.15021	0	0.833333	NA	NA	NA	47
M_0.1_F_qt_Set10	1.16663	0	0.833333	NA	NA	NA	49
M_0.1_F_qt_Set11	1.10355	0	0.833333	NA	NA	NA	41
M_0.1_F_qt_Set12	1.03536	0	0.833333	NA	NA	NA	44
M_0.1_F_qt_Set13	1.11596	0	0.666667	NA	NA	NA	39
M_0.1_F_qt_Set14	1.01846	0	0.833333	NA	NA	NA	42
M_0.1_F_qt_Set15	1.17794	0	0.666667	NA	NA	NA	43
M_0.1_F_qt_Set16	1.03077	0.68	0.833333	NA	NA	NA	44
M_0.1_F_qt_Set17	1.0778	0	0.833333	NA	NA	NA	45
M_0.1_F_qt_Set18	1.11919	0	0.833333	NA	NA	NA	43
M_0.1_F_qt_Set19	1.22589	0	0.833333	NA	NA	NA	46
M_0.1_F_qt_Set2	1.23978	0	0.833333	NA	NA	NA	43
M_0.1_F_qt_Set20	1.05795	0	0.833333	NA	NA	NA	41
M_0.1_F_qt_Set21	1.1148	0.71	0.833333	NA	NA	NA	54
M_0.1_F_qt_Set22	1.29733	0	0.833333	NA	NA	NA	46
M_0.1_F_qt_Set23	1.1328	0	0.833333	NA	NA	NA	46
M_0.1_F_qt_Set24	1.0465	0	0.833333	NA	NA	NA	45
M_0.1_F_qt_Set25	1.20364	0	0.833333	NA	NA	NA	47
M_0.1_F_qt_Set26	1.16584	0	0.833333	NA	NA	NA	56
M_0.1_F_qt_Set27	1.2253	0	0.833333	NA	NA	NA	54
M_0.1_F_qt_Set28	1.11266	0	0.833333	NA	NA	NA	46
M_0.1_F_qt_Set29	1.09469	0	0.833333	NA	NA	NA	58
M_0.1_F_qt_Set3	1.26927	0	0.833333	NA	NA	NA	51
M_0.1_F_qt_Set30	1.18401	0	0.833333	NA	NA	NA	49
M_0.1_F_qt_Set31	1.19756	0	0.833333	NA	NA	NA	47
M_0.1_F_qt_Set32	1.07775	0	0.833333	NA	NA	NA	56
M_0.1_F_qt_Set33	1.04855	0	0.833333	NA	NA	NA	56
M_0.1_F_qt_Set34	1.17983	0	0.833333	NA	NA	NA	54
M_0.1_F_qt_Set35	1.07443	0	0.833333	NA	NA	NA	58
M_0.1_F_qt_Set36	1.06553	0	0.833333	NA	NA	NA	58
M_0.1_F_qt_Set37	1.113	0	0.833333	NA	NA	NA	48
M_0.1_F_qt_Set38	1.21384	0	0.833333	NA	NA	NA	44
M_0.1_F_qt_Set39	1.0992	0.65	0.833333	NA	NA	NA	55
M_0.1_F_qt_Set4	1.21544	0	0.833333	NA	NA	NA	47
M_0.1_F_qt_Set40	1.16172	0	0.833333	NA	NA	NA	57
M_0.1_F_qt_Set41	1.17834	0	0.833333	NA	NA	NA	57
M_0.1_F_qt_Set42	1.09748	0	0.833333	NA	NA	NA	55
M_0.1_F_qt_Set43	1.04199	0	0.833333	NA	NA	NA	57
M_0.1_F_qt_Set44	1.18734	0	0.833333	NA	NA	NA	58
M_0.1_F_qt_Set45	1.16369	0	0.833333	NA	NA	NA	54
M_0.1_F_qt_Set46	1.15337	0	0.833333	NA	NA	NA	60
M_0.1_F_qt_Set47	1.13598	0	0.666667	NA	NA	NA	51
M_0.1_F_qt_Set48	1.11054	0	0.666667	NA	NA	NA	49
M_0.1_F_qt_Set49	1.0414	0	0.833333	NA	NA	NA	54
M_0.1_F_qt_Set5	1.18675	0	0.833333	NA	NA	NA	45
M_0.1_F_qt_Set50	1.0813	0	0.833333	NA	NA	NA	58
M_0.1_F_qt_Set51	1.36427	0	0.833333	NA	NA	NA	52
M_0.1_F_qt_Set52	1.19248	0	0.833333	NA	NA	NA	55
M_0.1_F_qt_Set53	1.26076	0	0.833333	NA	NA	NA	61
M_0.1_F_qt_Set54	1.20643	0	0.833333	NA	NA	NA	54
M_0.1_F_qt_Set55	1.09802	0	0.833333	NA	NA	NA	56
M_0.1_F_qt_Set56	1.07688	0	0.833333	NA	NA	NA	56
M_0.1_F_qt_Set57	1.13817	0	0.833333	NA	NA	NA	64
M_0.1_F_qt_Set58	1.14985	0	0.833333	NA	NA	NA	64
M_0.1_F_qt_Set59	1.1748	0	0.833333	NA	NA	NA	53
M_0.1_F_qt_Set6	1.05059	0	0.833333	NA	NA	NA	47
M_0.1_F_qt_Set60	1.12941	0	0.833333	NA	NA	NA	50
M_0.1_F_qt_Set61	1.04222	0	0.833333	NA	NA	NA	51
M_0.1_F_qt_Set62	1.241	0	0.833333	NA	NA	NA	60
M_0.1_F_qt_Set63	1.10448	0	0.833333	NA	NA	NA	59
M_0.1_F_qt_Set64	1.10848	0	0.833333	NA	NA	NA	71
M_0.1_F_qt_Set7	1.10841	0	0.833333	NA	NA	NA	42
M_0.1_F_qt_Set8	1.08859	0	0.833333	NA	NA	NA	44
M_0.1_F_qt_Set9	1.12018	0	0.833333	NA	NA	NA	47
M_0.1_F_qh_Set1	1.12927	0	0.333333	NA	NA	NA	32
M_0.1_F_qh_Set10	1.12691	0	0.333333	NA	NA	NA	41
M_0.1_F_qh_Set11	1.10684	0	0.333333	NA	NA	NA	30
M_0.1_F_qh_Set12	1.07885	0	0.333333	NA	NA	NA	41
M_0.1_F_qh_Set13	1.17817	0	0.333333	NA	NA	NA	44
M_0.1_F_qh_Set14	1.13715	0	0.666667	NA	NA	NA	59
M_0.1_F_qh_Set15	1.26939	0	0.5	NA	NA	NA	53
M_0.1_F_qh_Set16	1.14509	0	0.666667	NA	NA	NA	46
M_0.1_F_qh_Set17	1.14844	0	0.333333	NA	NA	NA	31
M_0.1_F_qh_Set18	1.17104	0	0.333333	NA	NA	NA	32
M_0.1_F_qh_Set19	1.32952	0	0	NA	NA	NA	26
M_0.1_F_qh_Set2	1.14734	0	0.5	NA	NA	NA	52
M_0.1_F_qh_Set20	1.29755	0	0.333333	NA	NA	NA	30
M_0.1_F_qh_Set21	1.08734	0	0.333333	NA	NA	NA	46
M_0.1_F_qh_Set22	1.33233	0	0	NA	NA	NA	40
M_0.1_F_qh_Set23	1.28716	0	0	NA	NA	NA	38
M_0.1_F_qh_Set24	1.13463	0	0.5	NA	NA	NA	39
M_0.1_F_qh_Set25	1.10303	0	0.5	NA	NA	NA	56
M_0.1_F_qh_Set26	1.13354	0	0.5	NA	NA	NA	50
M_0.1_F_qh_Set27	1.14452	0	0.166667	NA	NA	NA	45
M_0.1_F_qh_Set28	1.16137	0	0.333333	NA	NA	NA	40
M_0.1_F_qh_Set29	1.1226	0	0.666667	NA	NA	NA	50
M_0.1_F_qh_Set3	1.2085	0	0.5	NA	NA	NA	37
M_0.1_F_qh_Set30	1.21213	0	0.5	NA	NA	NA	71
M_0.1_F_qh_Set31	1.21697	0	0.5	NA	NA	NA	57
M_0.1_F_qh_Set32	1.18118	0	0.666667	NA	NA	NA	60
M_0.1_F_qh_Set33	1.16851	0	0.666667	NA	NA	NA	60
M_0.1_F_qh_Set34	1.31593	0	0.166667	NA	NA	NA	57
M_0.1_F_qh_Set35	1.14777	0	0.166667	NA	NA	NA	45
M_0.1_F_qh_Set36	1.16777	0	0.166667	NA	NA	NA	45
M_0.1_F_qh_Set37	1.12698	0	0.5	NA	NA	NA	63
M_0.1_F_qh_Set38	1.14359	0	0.5	NA	NA	NA	62
M_0.1_F_qh_Set39	1.08365	0	0.666667	NA	NA	NA	78
M_0.1_F_qh_Set4	1.23785	0	0.166667	NA	NA	NA	46
M_0.1_F_qh_Set40	1.15391	0	0.333333	NA	NA	NA	38
M_0.1_F_qh_Set41	1.11745	0	0.166667	NA	NA	NA	43
M_0.1_F_qh_Set42	1.17882	0	0.166667	NA	NA	NA	32
M_0.1_F_qh_Set43	1.12347	0	0.5	NA	NA	NA	37
M_0.1_F_qh_Set44	1.16059	0	0.333333	NA	NA	NA	48
M_0.1_F_qh_Set45	1.11287	0	0.333333	NA	NA	NA	47
M_0.1_F_qh_Set46	1.10163	0	0.166667	NA	NA	NA	52
M_0.1_F_qh_Set47	1.21059	0	0.5	NA	NA	NA	60
M_0.1_F_qh_Set48	1.16878	0	0.333333	NA	NA	NA	65
M_0.1_F_qh_Set49	1.17429	0	0.5	NA	NA	NA	51
M_0.1_F_qh_Set5	1.21336	0	0.333333	NA	NA	NA	46
M_0.1_F_qh_Set50	1.10533	0	0.333333	NA	NA	NA	44
M_0.1_F_qh_Set51	1.37478	0	0	NA	NA	NA	41
M_0.1_F_qh_Set52	1.31901	0	0.333333	NA	NA	NA	49
M_0.1_F_qh_Set53	1.11474	0	0.5	NA	NA	NA	65
M_0.1_F_qh_Set54	1.14174	0	0.5	NA	NA	NA	72
M_0.1_F_qh_Set55	1.09331	0	0.666667	NA	NA	NA	68
M_0.1_F_qh_Set56	1.12212	0	0.666667	NA	NA	NA	68
M_0.1_F_qh_Set57	1.25085	0	0.166667	NA	NA	NA	60
M_0.1_F_qh_Set58	1.21499	0	0.166667	NA	NA	NA	60
M_0.1_F_qh_Set59	1.13681	0	0.5	NA	NA	NA	67
M_0.1_F_qh_Set6	1.11642	0	0.666667	NA	NA	NA	44
M_0.1_F_qh_Set60	1.15493	0	0.333333	NA	NA	NA	77
M_0.1_F_qh_Set61	1.12834	0	0.5	NA	NA	NA	61
M_0.1_F_qh_Set62	1.07272	0	0.333333	NA	NA	NA	51
M_0.1_F_qh_Set63	1.13029	0	0.166667	NA	NA	NA	46
M_0.1_F_qh_Set64	1.16583	0	0.333333	NA	NA	NA	50
M_0.1_F_qh_Set7	1.12002	0	0.5	NA	NA	NA	54
M_0.1_F_qh_Set8	1.12484	0	0.166667	NA	NA	NA	23
M_0.1_F_qh_Set9	1.12109	0	0.5	NA	NA	NA	34
M_0.1_F_pt_Set1	1.17038	0	0.833333	NA	NA	NA	46
M_0.1_F_pt_Set10	1.17348	0	0.833333	NA	NA	NA	47
M_0.1_F_pt_Set11	1.09974	0	0.833333	NA	NA	NA	41
M_0.1_F_pt_Set12	1.03731	0	0.833333	NA	NA	NA	44
M_0.1_F_pt_Set13	1.1042	0	0.666667	NA	NA	NA	38
M_0.1_F_pt_Set14	1.03436	0	0.833333	NA	NA	NA	41
M_0.1_F_pt_Set15	1.21226	0	0.666667	NA	NA	NA	43
M_0.1_F_pt_Set16	1.06076	0.62	0.833333	NA	NA	NA	45
M_0.1_F_pt_Set17	1.07906	0	0.833333	NA	NA	NA	43
M_0.1_F_pt_Set18	1.10717	0	0.833333	NA	NA	NA	43
M_0.1_F_pt_Set19	1.30536	0	0.833333	NA	NA	NA	43
M_0.1_F_pt_Set2	1.1538	0	0.833333	NA	NA	NA	42
M_0.1_F_pt_Set20	1.02981	0	0.833333	NA	NA	NA	41
M_0.1_F_pt_Set21	1.14852	0.62	0.833333	NA	NA	NA	54
M_0.1_F_pt_Set22	1.26093	0	0.833333	NA	NA	NA	46
M_0.1_F_pt_Set23	1.157	0	0.833333	NA	NA	NA	48
M_0.1_F_pt_Set24	1.04225	0	0.833333	NA	NA	NA	45
M_0.1_F_pt_Set25	1.18162	0	0.833333	NA	NA	NA	45
M_0.1_F_pt_Set26	1.1724	0	0.833333	NA	NA	NA	58
M_0.1_F_pt_Set27	1.2592	0	0.833333	NA	NA	NA	56
M_0.1_F_pt_Set28	1.11304	0	0.833333	NA	NA	NA	47
M_0.1_F_pt_Set29	1.09089	0	0.833333	NA	NA	NA	57
M_0.1_F_pt_Set3	1.33517	0	0.833333	NA	NA	NA	50
M_0.1_F_pt_Set30	1.2269	0	0.833333	NA	NA	NA	48
M_0.1_F_pt_Set31	1.21321	0	0.833333	NA	NA	NA	47
M_0.1_F_pt_Set32	1.06928	0	0.833333	NA	NA	NA	53
M_0.1_F_pt_Set33	1.05643	0	0.833333	NA	NA	NA	53
M_0.1_F_pt_Set34	1.24343	0	0.833333	NA	NA	NA	52
M_0.1_F_pt_Set35	1.11738	0	0.833333	NA	NA	NA	60
M_0.1_F_pt_Set36	1.12181	0	0.833333	NA	NA	NA	60
M_0.1_F_pt_Set37	1.1043	0	0.833333	NA	NA	NA	46
M_0.1_F_pt_Set38	1.21136	0	0.833333	NA	NA	NA	44
M_0.1_F_pt_Set39	1.10301	0.59	0.833333	NA	NA	NA	51
M_0.1_F_pt_Set4	1.2651	0	0.833333	NA	NA	NA	48
M_0.1_F_pt_Set40	1.15267	0	0.833333	NA	NA	NA	56
M_0.1_F_pt_Set41	1.15649	0	0.833333	NA	NA	NA	57
M_0.1_F_pt_Set42	1.10634	0	0.833333	NA	NA	NA	52
M_0.1_F_pt_Set43	1.0341	0	0.833333	NA	NA	NA	56
M_0.1_F_pt_Set44	1.17941	0	0.833333	NA	NA	NA	58
M_0.1_F_pt_Set45	1.13627	0	0.833333	NA	NA	NA	57
M_0.1_F_pt_Set46	1.17034	0	0.833333	NA	NA	NA	62
M_0.1_F_pt_Set47	1.16366	0	0.666667	NA	NA	NA	50
M_0.1_F_pt_Set48	1.10874	0	0.666667	NA	NA	NA	49
M_0.1_F_pt_Set49	1.03427	0	0.833333	NA	NA	NA	53
M_0.1_F_pt_Set5	1.2548	0	0.833333	NA	NA	NA	42
M_0.1_F_pt_Set50	1.08191	0	0.833333	NA	NA	NA	58
M_0.1_F_pt_Set51	1.36044	0	0.833333	NA	NA	NA	53
M_0.1_F_pt_Set52	1.19017	0	0.833333	NA	NA	NA	56
M_0.1_F_pt_Set53	1.2165	0	0.833333	NA	NA	NA	61
M_0.1_F_pt_Set54	1.21754	0	0.833333	NA	NA	NA	53
M_0.1_F_pt_Set55	1.09304	0	0.833333	NA	NA	NA	57
M_0.1_F_pt_Set56	1.08465	0	0.833333	NA	NA	NA	57
M_0.1_F_pt_Set57	1.15921	0	0.833333	NA	NA	NA	62
M_0.1_F_pt_Set58	1.20776	0	0.833333	NA	NA	NA	62
M_0.1_F_pt_Set59	1.15138	0	0.833333	NA	NA	NA	56
M_0.1_F_pt_Set6	1.09344	0	0.833333	NA	NA	NA	48
M_0.1_F_pt_Set60	1.1525	0	0.833333	NA	NA	NA	51
M_0.1_F_pt_Set61	1.02026	0	0.833333	NA	NA	NA	58
M_0.1_F_pt_Set62	1.25	0	0.833333	NA	NA	NA	60
M_0.1_F_pt_Set63	1.12804	0	0.833333	NA	NA	NA	61
M_0.1_F_pt_Set64	1.13266	0	0.833333	NA	NA	NA	70
M_0.1_F_pt_Set7	1.10297	0	0.833333	NA	NA	NA	41
M_0.1_F_pt_Set8	1.12862	0	0.833333	NA	NA	NA	42
M_0.1_F_pt_Set9	1.1043	0	0.833333	NA	NA	NA	47
M_0.1_F_ph_Set1	1.11828	0	0.333333	NA	NA	NA	31
M_0.1_F_ph_Set10	1.13567	0	0.333333	NA	NA	NA	39
M_0.1_F_ph_Set11	1.0957	0	0.333333	NA	NA	NA	30
M_0.1_F_ph_Set12	1.08811	0	0.333333	NA	NA	NA	41
M_0.1_F_ph_Set13	1.17054	0	0.333333	NA	NA	NA	47
M_0.1_F_ph_Set14	1.15684	0	0.666667	NA	NA	NA	59
M_0.1_F_ph_Set15	1.2257	0	0.5	NA	NA	NA	53
M_0.1_F_ph_Set16	1.16718	0	0.666667	NA	NA	NA	53
M_0.1_F_ph_Set17	1.12173	0	0.333333	NA	NA	NA	28
M_0.1_F_ph_Set18	1.15752	0	0.333333	NA	NA	NA	39
M_0.1_F_ph_Set19	1.3188	0	0	NA	NA	NA	26
M_0.1_F_ph_Set2	1.16425	0	0.5	NA	NA	NA	57
M_0.1_F_ph_Set20	1.30565	0	0.166667	NA	NA	NA	31
M_0.1_F_ph_Set21	1.09427	0	0.333333	NA	NA	NA	46
M_0.1_F_ph_Set22	1.35159	0	0	NA	NA	NA	41
M_0.1_F_ph_Set23	1.31535	0	0.166667	NA	NA	NA	38
M_0.1_F_ph_Set24	1.13799	0	0.5	NA	NA	NA	39
M_0.1_F_ph_Set25	1.09461	0	0.5	NA	NA	NA	55
M_0.1_F_ph_Set26	1.13912	0	0.5	NA	NA	NA	50
M_0.1_F_ph_Set27	1.18226	0	0.166667	NA	NA	NA	43
M_0.1_F_ph_Set28	1.15488	0	0.333333	NA	NA	NA	40
M_0.1_F_ph_Set29	1.14121	0	0.666667	NA	NA	NA	50
M_0.1_F_ph_Set3	1.20082	0	0.5	NA	NA	NA	36
M_0.1_F_ph_Set30	1.21023	0	0.5	NA	NA	NA	67
M_0.1_F_ph_Set31	1.20154	0	0.5	NA	NA	NA	57
M_0.1_F_ph_Set32	1.19419	0	0.666667	NA	NA	NA	64
M_0.1_F_ph_Set33	1.19626	0	0.666667	NA	NA	NA	64
M_0.1_F_ph_Set34	1.2789	0	0.166667	NA	NA	NA	49
M_0.1_F_ph_Set35	1.20472	0	0.333333	NA	NA	NA	46
M_0.1_F_ph_Set36	1.21062	0	0.333333	NA	NA	NA	46
M_0.1_F_ph_Set37	1.13149	0	0.5	NA	NA	NA	64
M_0.1_F_ph_Set38	1.15151	0	0.5	NA	NA	NA	62
M_0.1_F_ph_Set39	1.11028	0	0.666667	NA	NA	NA	65
M_0.1_F_ph_Set4	1.31248	0	0.166667	NA	NA	NA	35
M_0.1_F_ph_Set40	1.15267	0	0.333333	NA	NA	NA	37
M_0.1_F_ph_Set41	1.14299	0	0.166667	NA	NA	NA	45
M_0.1_F_ph_Set42	1.15897	0	0.166667	NA	NA	NA	32
M_0.1_F_ph_Set43	1.12659	0	0.5	NA	NA	NA	43
M_0.1_F_ph_Set44	1.15742	0	0.333333	NA	NA	NA	48
M_0.1_F_ph_Set45	1.12949	0	0.333333	NA	NA	NA	46
M_0.1_F_ph_Set46	1.12672	0	0.166667	NA	NA	NA	46
M_0.1_F_ph_Set47	1.16939	0	0.5	NA	NA	NA	58
M_0.1_F_ph_Set48	1.1451	0	0.333333	NA	NA	NA	67
M_0.1_F_ph_Set49	1.18862	0	0.5	NA	NA	NA	61
M_0.1_F_ph_Set5	1.18852	0	0.333333	NA	NA	NA	42
M_0.1_F_ph_Set50	1.09766	0	0.333333	NA	NA	NA	45
M_0.1_F_ph_Set51	1.33734	0	0	NA	NA	NA	40
M_0.1_F_ph_Set52	1.31665	0	0.5	NA	NA	NA	47
M_0.1_F_ph_Set53	1.12118	0	0.5	NA	NA	NA	71
M_0.1_F_ph_Set54	1.12805	0	0.5	NA	NA	NA	70
M_0.1_F_ph_Set55	1.11413	0	0.666667	NA	NA	NA	65
M_0.1_F_ph_Set56	1.11749	0	0.666667	NA	NA	NA	65
M_0.1_F_ph_Set57	1.24479	0	0.166667	NA	NA	NA	57
M_0.1_F_ph_Set58	1.26247	0	0.166667	NA	NA	NA	57
M_0.1_F_ph_Set59	1.12767	0	0.5	NA	NA	NA	70
M_0.1_F_ph_Set6	1.11989	0	0.666667	NA	NA	NA	46
M_0.1_F_ph_Set60	1.16956	0	0.333333	NA	NA	NA	65
M_0.1_F_ph_Set61	1.12464	0	0.5	NA	NA	NA	62
M_0.1_F_ph_Set62	1.0943	0	0.333333	NA	NA	NA	53
M_0.1_F_ph_Set63	1.20319	0	0.166667	NA	NA	NA	45
M_0.1_F_ph_Set64	1.19865	0	0.5	NA	NA	NA	42
M_0.1_F_ph_Set7	1.09708	0	0.5	NA	NA	NA	54
M_0.1_F_ph_Set8	1.15355	0	0.166667	NA	NA	NA	23
M_0.1_F_ph_Set9	1.12976	0	0.5	NA	NA	NA	34
M_0.1_F_th_Set1	1.07902	0	0.833333	NA	NA	NA	49
M_0.1_F_th_Set10	1.07278	0	0.833333	NA	NA	NA	52
M_0.1_F_th_Set11	1.0432	0	0.833333	NA	NA	NA	47
M_0.1_F_th_Set12	1.06237	0	0.833333	NA	NA	NA	50
M_0.1_F_th_Set13	1.13346	0	0.666667	NA	NA	NA	44
M_0.1_F_th_Set14	1.08405	0	0.833333	NA	NA	NA	57
M_0.1_F_th_Set15	1.24855	0	0.833333	NA	NA	NA	50
M_0.1_F_th_Set16	1.08678	0	0.833333	NA	NA	NA	45
M_0.1_F_th_Set17	1.11982	0	0.833333	NA	NA	NA	51
M_0.1_F_th_Set18	1.08674	0	0.833333	NA	NA	NA	48
M_0.1_F_th_Set19	1.28906	0	0.833333	NA	NA	NA	50
M_0.1_F_th_Set2	1.18496	0	0.833333	NA	NA	NA	43
M_0.1_F_th_Set20	1.11916	0	0.833333	NA	NA	NA	47
M_0.1_F_th_Set21	1.07949	0	0.833333	NA	NA	NA	60
M_0.1_F_th_Set22	1.28291	0	0.833333	NA	NA	NA	50
M_0.1_F_th_Set23	1.16301	0	0.833333	NA	NA	NA	51
M_0.1_F_th_Set24	1.14599	0	0.833333	NA	NA	NA	49
M_0.1_F_th_Set25	1.09867	0	0.833333	NA	NA	NA	55
M_0.1_F_th_Set26	1.08844	0	0.833333	NA	NA	NA	66
M_0.1_F_th_Set27	1.09651	0	0.833333	NA	NA	NA	58
M_0.1_F_th_Set28	1.05071	0	0.833333	NA	NA	NA	56
M_0.1_F_th_Set29	1.07527	0	0.833333	NA	NA	NA	61
M_0.1_F_th_Set3	1.28447	0	0.833333	NA	NA	NA	57
M_0.1_F_th_Set30	1.20659	0	0.833333	NA	NA	NA	58
M_0.1_F_th_Set31	1.1801	0	0.833333	NA	NA	NA	58
M_0.1_F_th_Set32	1.12542	0	0.833333	NA	NA	NA	53
M_0.1_F_th_Set33	1.09793	0	0.833333	NA	NA	NA	53
M_0.1_F_th_Set34	1.22273	0	0.833333	NA	NA	NA	64
M_0.1_F_th_Set35	1.17906	0	0.833333	NA	NA	NA	59
M_0.1_F_th_Set36	1.16258	0	0.833333	NA	NA	NA	59
M_0.1_F_th_Set37	1.10165	0	0.833333	NA	NA	NA	63
M_0.1_F_th_Set38	1.06413	0	0.833333	NA	NA	NA	60
M_0.1_F_th_Set39	1.16536	0.77	0.833333	NA	NA	NA	61
M_0.1_F_th_Set4	1.34386	0	0.833333	NA	NA	NA	51
M_0.1_F_th_Set40	1.09697	0	0.833333	NA	NA	NA	64
M_0.1_F_th_Set41	1.05909	0	0.833333	NA	NA	NA	68
M_0.1_F_th_Set42	1.06219	0	0.833333	NA	NA	NA	56
M_0.1_F_th_Set43	1.06525	0	0.833333	NA	NA	NA	60
M_0.1_F_th_Set44	1.09658	0	0.833333	NA	NA	NA	67
M_0.1_F_th_Set45	1.08397	0	0.833333	NA	NA	NA	61
M_0.1_F_th_Set46	1.08263	0	0.833333	NA	NA	NA	63
M_0.1_F_th_Set47	1.14886	0	0.666667	NA	NA	NA	60
M_0.1_F_th_Set48	1.15788	0	0.833333	NA	NA	NA	59
M_0.1_F_th_Set49	1.10227	0	0.833333	NA	NA	NA	53
M_0.1_F_th_Set5	1.25565	0	0.833333	NA	NA	NA	47
M_0.1_F_th_Set50	1.10402	0	0.833333	NA	NA	NA	65
M_0.1_F_th_Set51	1.43462	0	0.833333	NA	NA	NA	59
M_0.1_F_th_Set52	1.22129	0	0.833333	NA	NA	NA	65
M_0.1_F_th_Set53	1.12191	0	0.833333	NA	NA	NA	69
M_0.1_F_th_Set54	1.05093	0	0.833333	NA	NA	NA	63
M_0.1_F_th_Set55	1.17729	0.64	0.833333	NA	NA	NA	62
M_0.1_F_th_Set56	1.20287	0.6	0.833333	NA	NA	NA	62
M_0.1_F_th_Set57	1.11553	0	0.833333	NA	NA	NA	63
M_0.1_F_th_Set58	1.09557	0	0.833333	NA	NA	NA	63
M_0.1_F_th_Set59	1.13556	0	0.833333	NA	NA	NA	57
M_0.1_F_th_Set6	1.13917	0	0.833333	NA	NA	NA	49
M_0.1_F_th_Set60	1.09507	0	0.833333	NA	NA	NA	65
M_0.1_F_th_Set61	1.18723	0.61	0.833333	NA	NA	NA	64
M_0.1_F_th_Set62	1.11547	0	0.833333	NA	NA	NA	70
M_0.1_F_th_Set63	1.08232	0	0.833333	NA	NA	NA	67
M_0.1_F_th_Set64	1.07787	0	0.833333	NA	NA	NA	68
M_0.1_F_th_Set7	1.07841	0	0.833333	NA	NA	NA	47
M_0.1_F_th_Set8	1.05663	0	0.833333	NA	NA	NA	49
M_0.1_F_th_Set9	1.06755	0	0.833333	NA	NA	NA	55
M_0.1_F_lqp_Set1	1.26069	0	0	271.178	7.73113	4.29887e-07	3
M_0.1_F_lqp_Set10	1.14114	0	0.166667	273.069	9.62217	1.67005e-07	3
M_0.1_F_lqp_Set11	1.18554	0	0	273.232	9.78593	1.53879e-07	3
M_0.1_F_lqp_Set12	1.26573	0	0	273.037	9.59011	1.69711e-07	3
M_0.1_F_lqp_Set13	1.27727	0	0	268.74	5.29363	1.4544e-06	5
M_0.1_F_lqp_Set14	1.40945	0	0	273.228	9.78181	1.54205e-07	4
M_0.1_F_lqp_Set15	1.18324	0	0	267.058	3.61182	3.37211e-06	3
M_0.1_F_lqp_Set16	1.58447	0	0	268.174	4.72717	1.9307e-06	4
M_0.1_F_lqp_Set17	1.26923	0	0	275.845	12.3988	4.16728e-08	2
M_0.1_F_lqp_Set18	1.34833	0	0	281.882	18.4356	2.03694e-09	5
M_0.1_F_lqp_Set19	1.31072	0	0	275.087	11.6403	6.08942e-08	4
M_0.1_F_lqp_Set2	1.24501	0	0	273.192	9.74588	1.57019e-07	5
M_0.1_F_lqp_Set20	1.25534	0	0	282.104	18.6573	1.82334e-09	5
M_0.1_F_lqp_Set21	1.28987	0	0	276.152	12.7051	3.57579e-08	3
M_0.1_F_lqp_Set22	1.30786	0	0	279.791	16.3442	5.79669e-09	5
M_0.1_F_lqp_Set23	1.34638	0	0	278.919	15.4723	8.96432e-09	5
M_0.1_F_lqp_Set24	1.27829	0	0	276.257	12.8103	3.39282e-08	4
M_0.1_F_lqp_Set25	1.24138	0	0	279.382	15.9358	7.11005e-09	7
M_0.1_F_lqp_Set26	1.24702	0	0	271.174	7.72708	4.30913e-07	3
M_0.1_F_lqp_Set27	1.32252	0	0	278.506	15.0594	1.10207e-08	6
M_0.1_F_lqp_Set28	1.28774	0	0	272.636	9.18975	2.07393e-07	4
M_0.1_F_lqp_Set29	1.24551	0	0	276.117	12.6708	3.63829e-08	5
M_0.1_F_lqp_Set3	1.0877	0	0.333333	277.851	14.4046	1.52906e-08	3
M_0.1_F_lqp_Set30	1.25909	0	0	280.577	17.131	3.91195e-09	7
M_0.1_F_lqp_Set31	1.28196	0	0	275.231	11.785	5.66599e-08	6
M_0.1_F_lqp_Set32	1.46784	0	0	276.656	13.2098	2.77908e-08	7
M_0.1_F_lqp_Set33	1.49254	0	0	276.656	13.2098	2.77914e-08	7
M_0.1_F_lqp_Set34	1.34156	0	0	283.284	19.8379	1.01074e-09	7
M_0.1_F_lqp_Set35	1.19342	0	0	289.021	25.5746	5.74023e-11	8
M_0.1_F_lqp_Set36	1.19758	0	0	289.021	25.5746	5.74035e-11	8
M_0.1_F_lqp_Set37	1.59619	0	0	269.709	6.26217	8.96598e-07	4
M_0.1_F_lqp_Set38	1.23343	0	0	276.196	12.7499	3.49788e-08	6
M_0.1_F_lqp_Set39	1.57702	0	0	270.596	7.14948	5.75359e-07	5
M_0.1_F_lqp_Set4	1.19546	0	0	276.878	13.4318	2.48745e-08	5
M_0.1_F_lqp_Set40	1.28832	0	0	278.683	15.2365	1.00899e-08	5
M_0.1_F_lqp_Set41	1.21853	0	0.166667	277.888	14.4419	1.50119e-08	5
M_0.1_F_lqp_Set42	1.19522	0	0	278.967	15.5205	8.75436e-09	5
M_0.1_F_lqp_Set43	1.33154	0	0	277.233	13.7865	2.08345e-08	5
M_0.1_F_lqp_Set44	1.30135	0	0	274.508	11.0616	8.13756e-08	4
M_0.1_F_lqp_Set45	1.28623	0	0.166667	274.79	11.3437	7.06704e-08	4
M_0.1_F_lqp_Set46	1.3515	0	0	280.11	16.6636	4.94362e-09	6
M_0.1_F_lqp_Set47	1.40776	0	0	281.106	17.6601	3.00384e-09	8
M_0.1_F_lqp_Set48	1.24128	0	0	272.8	9.35359	1.91167e-07	6
M_0.1_F_lqp_Set49	1.39099	0	0	279.199	15.7529	7.79508e-09	8
M_0.1_F_lqp_Set5	1.2421	0	0	274.865	11.4189	6.80683e-08	4
M_0.1_F_lqp_Set50	1.27269	0	0	284.782	21.3352	4.7825e-10	6
M_0.1_F_lqp_Set51	1.31468	0	0	291.524	28.0778	1.64259e-11	8
M_0.1_F_lqp_Set52	1.31065	0	0	290.472	27.0259	2.77951e-11	8
M_0.1_F_lqp_Set53	1.25233	0	0	278.275	14.8285	1.23768e-08	7
M_0.1_F_lqp_Set54	1.24798	0	0	289.182	25.7353	5.29942e-11	9
M_0.1_F_lqp_Set55	1.29793	0	0	299.154	35.7077	3.62038e-13	11
M_0.1_F_lqp_Set56	1.29833	0	0	299.154	35.7077	3.62046e-13	11
M_0.1_F_lqp_Set57	1.3095	0	0	281.837	18.391	2.08471e-09	7
M_0.1_F_lqp_Set58	1.29844	0	0	281.837	18.391	2.08476e-09	7
M_0.1_F_lqp_Set59	1.41149	0	0	284.821	21.3742	4.69117e-10	9
M_0.1_F_lqp_Set6	1.14141	0	0.333333	280.427	16.9808	4.2198e-09	4
M_0.1_F_lqp_Set60	1.22781	0	0	293.03	29.5832	7.73988e-12	10
M_0.1_F_lqp_Set61	1.41344	0	0	283.594	20.1474	8.66368e-10	9
M_0.1_F_lqp_Set62	1.29203	0	0	277.316	13.8691	1.99994e-08	5
M_0.1_F_lqp_Set63	1.22186	0	0.166667	284.862	21.4154	4.59601e-10	7
M_0.1_F_lqp_Set64	1.33698	0	0	293.9	30.4537	5.00892e-12	9
M_0.1_F_lqp_Set7	1.19557	0	0	274.182	10.736	9.58049e-08	3
M_0.1_F_lqp_Set8	1.17131	0	0	272.951	9.50475	1.77323e-07	3
M_0.1_F_lqp_Set9	1.25534	0	0.166667	270.373	6.92643	6.4365e-07	2
M_0.1_F_lqt_Set1	1.15496	0	0.833333	NA	NA	NA	47
M_0.1_F_lqt_Set10	1.16168	0	0.833333	NA	NA	NA	49
M_0.1_F_lqt_Set11	1.08496	0	0.833333	NA	NA	NA	41
M_0.1_F_lqt_Set12	1.05148	0	0.833333	NA	NA	NA	44
M_0.1_F_lqt_Set13	1.11692	0	0.666667	NA	NA	NA	39
M_0.1_F_lqt_Set14	1.02101	0	0.833333	NA	NA	NA	42
M_0.1_F_lqt_Set15	1.20533	0	0.666667	NA	NA	NA	43
M_0.1_F_lqt_Set16	1.05944	0.63	0.833333	NA	NA	NA	44
M_0.1_F_lqt_Set17	1.07422	0	0.833333	NA	NA	NA	45
M_0.1_F_lqt_Set18	1.10992	0	0.833333	NA	NA	NA	43
M_0.1_F_lqt_Set19	1.20131	0	0.833333	NA	NA	NA	47
M_0.1_F_lqt_Set2	1.19464	0	0.833333	NA	NA	NA	43
M_0.1_F_lqt_Set20	1.05852	0	0.833333	NA	NA	NA	41
M_0.1_F_lqt_Set21	1.12538	0.63	0.833333	NA	NA	NA	54
M_0.1_F_lqt_Set22	1.26117	0	0.833333	NA	NA	NA	46
M_0.1_F_lqt_Set23	1.11658	0	0.833333	NA	NA	NA	46
M_0.1_F_lqt_Set24	1.04648	0	0.833333	NA	NA	NA	45
M_0.1_F_lqt_Set25	1.19185	0	0.833333	NA	NA	NA	47
M_0.1_F_lqt_Set26	1.18649	0	0.833333	NA	NA	NA	56
M_0.1_F_lqt_Set27	1.18517	0	0.833333	NA	NA	NA	54
M_0.1_F_lqt_Set28	1.08233	0	0.833333	NA	NA	NA	46
M_0.1_F_lqt_Set29	1.09327	0	0.833333	NA	NA	NA	58
M_0.1_F_lqt_Set3	1.25094	0	0.833333	NA	NA	NA	51
M_0.1_F_lqt_Set30	1.1704	0	0.833333	NA	NA	NA	49
M_0.1_F_lqt_Set31	1.19423	0	0.833333	NA	NA	NA	47
M_0.1_F_lqt_Set32	1.04343	0	0.833333	NA	NA	NA	56
M_0.1_F_lqt_Set33	1.05936	0	0.833333	NA	NA	NA	56
M_0.1_F_lqt_Set34	1.13344	0	0.833333	NA	NA	NA	54
M_0.1_F_lqt_Set35	1.06658	0	0.833333	NA	NA	NA	58
M_0.1_F_lqt_Set36	1.0593	0	0.833333	NA	NA	NA	58
M_0.1_F_lqt_Set37	1.1018	0	0.833333	NA	NA	NA	48
M_0.1_F_lqt_Set38	1.19834	0	0.833333	NA	NA	NA	44
M_0.1_F_lqt_Set39	1.12124	0.73	0.833333	NA	NA	NA	55
M_0.1_F_lqt_Set4	1.24414	0	0.833333	NA	NA	NA	47
M_0.1_F_lqt_Set40	1.1513	0	0.833333	NA	NA	NA	57
M_0.1_F_lqt_Set41	1.17909	0	0.833333	NA	NA	NA	57
M_0.1_F_lqt_Set42	1.09916	0	0.833333	NA	NA	NA	55
M_0.1_F_lqt_Set43	1.03048	0	0.833333	NA	NA	NA	57
M_0.1_F_lqt_Set44	1.1797	0	0.833333	NA	NA	NA	58
M_0.1_F_lqt_Set45	1.18942	0	0.833333	NA	NA	NA	54
M_0.1_F_lqt_Set46	1.15447	0	0.833333	NA	NA	NA	60
M_0.1_F_lqt_Set47	1.16399	0	0.666667	NA	NA	NA	51
M_0.1_F_lqt_Set48	1.13661	0	0.666667	NA	NA	NA	49
M_0.1_F_lqt_Set49	1.04004	0	0.833333	NA	NA	NA	54
M_0.1_F_lqt_Set5	1.22309	0	0.833333	NA	NA	NA	45
M_0.1_F_lqt_Set50	1.09814	0	0.833333	NA	NA	NA	58
M_0.1_F_lqt_Set51	1.35466	0	0.833333	NA	NA	NA	52
M_0.1_F_lqt_Set52	1.18307	0	0.833333	NA	NA	NA	55
M_0.1_F_lqt_Set53	1.21358	0	0.833333	NA	NA	NA	61
M_0.1_F_lqt_Set54	1.21557	0	0.833333	NA	NA	NA	54
M_0.1_F_lqt_Set55	1.09226	0	0.833333	NA	NA	NA	56
M_0.1_F_lqt_Set56	1.07899	0	0.833333	NA	NA	NA	56
M_0.1_F_lqt_Set57	1.12334	0	0.833333	NA	NA	NA	64
M_0.1_F_lqt_Set58	1.15691	0	0.833333	NA	NA	NA	64
M_0.1_F_lqt_Set59	1.16173	0	0.833333	NA	NA	NA	53
M_0.1_F_lqt_Set6	1.05473	0	0.833333	NA	NA	NA	47
M_0.1_F_lqt_Set60	1.17314	0	0.833333	NA	NA	NA	50
M_0.1_F_lqt_Set61	1.02559	0	0.833333	NA	NA	NA	51
M_0.1_F_lqt_Set62	1.25568	0	0.833333	NA	NA	NA	60
M_0.1_F_lqt_Set63	1.11695	0	0.833333	NA	NA	NA	59
M_0.1_F_lqt_Set64	1.11672	0	0.833333	NA	NA	NA	71
M_0.1_F_lqt_Set7	1.12183	0	0.833333	NA	NA	NA	43
M_0.1_F_lqt_Set8	1.09325	0	0.833333	NA	NA	NA	44
M_0.1_F_lqt_Set9	1.1164	0	0.833333	NA	NA	NA	47
M_0.1_F_lqh_Set1	1.10393	0	0.333333	NA	NA	NA	33
M_0.1_F_lqh_Set10	1.09849	0	0.333333	NA	NA	NA	38
M_0.1_F_lqh_Set11	1.0945	0	0.333333	NA	NA	NA	30
M_0.1_F_lqh_Set12	1.0941	0	0.333333	NA	NA	NA	41
M_0.1_F_lqh_Set13	1.17479	0	0.333333	NA	NA	NA	44
M_0.1_F_lqh_Set14	1.14044	0	0.666667	NA	NA	NA	57
M_0.1_F_lqh_Set15	1.19738	0	0.5	NA	NA	NA	53
M_0.1_F_lqh_Set16	1.13777	0	0.666667	NA	NA	NA	50
M_0.1_F_lqh_Set17	1.14324	0	0.333333	NA	NA	NA	32
M_0.1_F_lqh_Set18	1.16156	0	0.333333	NA	NA	NA	34
M_0.1_F_lqh_Set19	1.32003	0	0	NA	NA	NA	27
M_0.1_F_lqh_Set2	1.13787	0	0.5	NA	NA	NA	52
M_0.1_F_lqh_Set20	1.30171	0	0.333333	NA	NA	NA	30
M_0.1_F_lqh_Set21	1.08572	0	0.333333	NA	NA	NA	46
M_0.1_F_lqh_Set22	1.35827	0	0	NA	NA	NA	40
M_0.1_F_lqh_Set23	1.28213	0	0	NA	NA	NA	38
M_0.1_F_lqh_Set24	1.13455	0	0.5	NA	NA	NA	39
M_0.1_F_lqh_Set25	1.09112	0	0.5	NA	NA	NA	56
M_0.1_F_lqh_Set26	1.15205	0	0.5	NA	NA	NA	50
M_0.1_F_lqh_Set27	1.13427	0	0.166667	NA	NA	NA	45
M_0.1_F_lqh_Set28	1.14447	0	0.333333	NA	NA	NA	41
M_0.1_F_lqh_Set29	1.13935	0	0.666667	NA	NA	NA	50
M_0.1_F_lqh_Set3	1.20579	0	0.5	NA	NA	NA	37
M_0.1_F_lqh_Set30	1.20816	0	0.5	NA	NA	NA	71
M_0.1_F_lqh_Set31	1.18874	0	0.5	NA	NA	NA	59
M_0.1_F_lqh_Set32	1.1683	0	0.666667	NA	NA	NA	60
M_0.1_F_lqh_Set33	1.17287	0	0.666667	NA	NA	NA	60
M_0.1_F_lqh_Set34	1.34176	0	0.166667	NA	NA	NA	63
M_0.1_F_lqh_Set35	1.16585	0	0.166667	NA	NA	NA	45
M_0.1_F_lqh_Set36	1.14817	0	0.166667	NA	NA	NA	45
M_0.1_F_lqh_Set37	1.13773	0	0.5	NA	NA	NA	62
M_0.1_F_lqh_Set38	1.15976	0	0.5	NA	NA	NA	62
M_0.1_F_lqh_Set39	1.08182	0	0.666667	NA	NA	NA	78
M_0.1_F_lqh_Set4	1.21894	0	0.166667	NA	NA	NA	41
M_0.1_F_lqh_Set40	1.18898	0	0.333333	NA	NA	NA	38
M_0.1_F_lqh_Set41	1.12981	0	0.166667	NA	NA	NA	43
M_0.1_F_lqh_Set42	1.154	0	0.166667	NA	NA	NA	32
M_0.1_F_lqh_Set43	1.13234	0	0.5	NA	NA	NA	37
M_0.1_F_lqh_Set44	1.13318	0	0.333333	NA	NA	NA	48
M_0.1_F_lqh_Set45	1.16607	0	0.333333	NA	NA	NA	47
M_0.1_F_lqh_Set46	1.12304	0	0.166667	NA	NA	NA	52
M_0.1_F_lqh_Set47	1.18122	0	0.5	NA	NA	NA	56
M_0.1_F_lqh_Set48	1.16449	0	0.333333	NA	NA	NA	66
M_0.1_F_lqh_Set49	1.18446	0	0.5	NA	NA	NA	52
M_0.1_F_lqh_Set5	1.21637	0	0.333333	NA	NA	NA	46
M_0.1_F_lqh_Set50	1.07818	0	0.333333	NA	NA	NA	44
M_0.1_F_lqh_Set51	1.39324	0	0	NA	NA	NA	39
M_0.1_F_lqh_Set52	1.31856	0	0.333333	NA	NA	NA	49
M_0.1_F_lqh_Set53	1.1186	0	0.5	NA	NA	NA	65
M_0.1_F_lqh_Set54	1.14263	0	0.5	NA	NA	NA	72
M_0.1_F_lqh_Set55	1.09939	0	0.666667	NA	NA	NA	68
M_0.1_F_lqh_Set56	1.1027	0	0.666667	NA	NA	NA	68
M_0.1_F_lqh_Set57	1.23352	0	0.166667	NA	NA	NA	63
M_0.1_F_lqh_Set58	1.20071	0	0.166667	NA	NA	NA	63
M_0.1_F_lqh_Set59	1.13649	0	0.5	NA	NA	NA	67
M_0.1_F_lqh_Set6	1.12579	0	0.666667	NA	NA	NA	48
M_0.1_F_lqh_Set60	1.16771	0	0.333333	NA	NA	NA	77
M_0.1_F_lqh_Set61	1.12179	0	0.5	NA	NA	NA	61
M_0.1_F_lqh_Set62	1.08764	0	0.333333	NA	NA	NA	51
M_0.1_F_lqh_Set63	1.17243	0	0.166667	NA	NA	NA	46
M_0.1_F_lqh_Set64	1.16263	0	0.333333	NA	NA	NA	50
M_0.1_F_lqh_Set7	1.1429	0	0.5	NA	NA	NA	54
M_0.1_F_lqh_Set8	1.12667	0	0.166667	NA	NA	NA	23
M_0.1_F_lqh_Set9	1.1365	0	0.5	NA	NA	NA	35
M_0.1_F_lpt_Set1	1.18303	0	0.833333	NA	NA	NA	47
M_0.1_F_lpt_Set10	1.16462	0	0.833333	NA	NA	NA	49
M_0.1_F_lpt_Set11	1.09715	0	0.833333	NA	NA	NA	41
M_0.1_F_lpt_Set12	1.04313	0	0.833333	NA	NA	NA	44
M_0.1_F_lpt_Set13	1.10189	0	0.666667	NA	NA	NA	38
M_0.1_F_lpt_Set14	1.02906	0	0.833333	NA	NA	NA	41
M_0.1_F_lpt_Set15	1.16908	0	0.666667	NA	NA	NA	43
M_0.1_F_lpt_Set16	1.05338	0.69	0.833333	NA	NA	NA	45
M_0.1_F_lpt_Set17	1.08818	0	0.833333	NA	NA	NA	43
M_0.1_F_lpt_Set18	1.1125	0	0.833333	NA	NA	NA	43
M_0.1_F_lpt_Set19	1.30935	0	0.833333	NA	NA	NA	43
M_0.1_F_lpt_Set2	1.1507	0	0.833333	NA	NA	NA	42
M_0.1_F_lpt_Set20	1.02981	0	0.833333	NA	NA	NA	41
M_0.1_F_lpt_Set21	1.15471	0.67	0.833333	NA	NA	NA	54
M_0.1_F_lpt_Set22	1.24783	0	0.833333	NA	NA	NA	46
M_0.1_F_lpt_Set23	1.15361	0	0.833333	NA	NA	NA	48
M_0.1_F_lpt_Set24	1.06048	0	0.833333	NA	NA	NA	45
M_0.1_F_lpt_Set25	1.19811	0	0.833333	NA	NA	NA	45
M_0.1_F_lpt_Set26	1.14897	0	0.833333	NA	NA	NA	58
M_0.1_F_lpt_Set27	1.2195	0	0.833333	NA	NA	NA	56
M_0.1_F_lpt_Set28	1.13573	0	0.833333	NA	NA	NA	47
M_0.1_F_lpt_Set29	1.09641	0	0.833333	NA	NA	NA	57
M_0.1_F_lpt_Set3	1.34906	0	0.833333	NA	NA	NA	50
M_0.1_F_lpt_Set30	1.19208	0	0.833333	NA	NA	NA	48
M_0.1_F_lpt_Set31	1.16953	0	0.833333	NA	NA	NA	47
M_0.1_F_lpt_Set32	1.04318	0	0.833333	NA	NA	NA	53
M_0.1_F_lpt_Set33	1.08405	0	0.833333	NA	NA	NA	53
M_0.1_F_lpt_Set34	1.28166	0	0.833333	NA	NA	NA	52
M_0.1_F_lpt_Set35	1.11887	0	0.833333	NA	NA	NA	60
M_0.1_F_lpt_Set36	1.11929	0	0.833333	NA	NA	NA	60
M_0.1_F_lpt_Set37	1.10917	0	0.833333	NA	NA	NA	46
M_0.1_F_lpt_Set38	1.20927	0	0.833333	NA	NA	NA	44
M_0.1_F_lpt_Set39	1.09568	0.65	0.833333	NA	NA	NA	51
M_0.1_F_lpt_Set4	1.28162	0	0.833333	NA	NA	NA	48
M_0.1_F_lpt_Set40	1.15733	0	0.833333	NA	NA	NA	56
M_0.1_F_lpt_Set41	1.17503	0	0.833333	NA	NA	NA	57
M_0.1_F_lpt_Set42	1.09135	0	0.833333	NA	NA	NA	52
M_0.1_F_lpt_Set43	1.03027	0	0.833333	NA	NA	NA	56
M_0.1_F_lpt_Set44	1.18729	0	0.833333	NA	NA	NA	58
M_0.1_F_lpt_Set45	1.19352	0	0.833333	NA	NA	NA	56
M_0.1_F_lpt_Set46	1.16542	0	0.833333	NA	NA	NA	62
M_0.1_F_lpt_Set47	1.14798	0	0.666667	NA	NA	NA	50
M_0.1_F_lpt_Set48	1.12569	0	0.666667	NA	NA	NA	49
M_0.1_F_lpt_Set49	1.04335	0	0.833333	NA	NA	NA	53
M_0.1_F_lpt_Set5	1.23662	0	0.833333	NA	NA	NA	42
M_0.1_F_lpt_Set50	1.08629	0	0.833333	NA	NA	NA	58
M_0.1_F_lpt_Set51	1.37199	0	0.833333	NA	NA	NA	53
M_0.1_F_lpt_Set52	1.17592	0	0.833333	NA	NA	NA	56
M_0.1_F_lpt_Set53	1.24684	0	0.833333	NA	NA	NA	61
M_0.1_F_lpt_Set54	1.22833	0	0.833333	NA	NA	NA	53
M_0.1_F_lpt_Set55	1.10049	0	0.833333	NA	NA	NA	57
M_0.1_F_lpt_Set56	1.08737	0	0.833333	NA	NA	NA	57
M_0.1_F_lpt_Set57	1.1807	0	0.833333	NA	NA	NA	62
M_0.1_F_lpt_Set58	1.16722	0	0.833333	NA	NA	NA	62
M_0.1_F_lpt_Set59	1.1638	0	0.833333	NA	NA	NA	56
M_0.1_F_lpt_Set6	1.10004	0	0.833333	NA	NA	NA	47
M_0.1_F_lpt_Set60	1.12743	0	0.833333	NA	NA	NA	51
M_0.1_F_lpt_Set61	1.03325	0	0.833333	NA	NA	NA	58
M_0.1_F_lpt_Set62	1.24982	0	0.833333	NA	NA	NA	60
M_0.1_F_lpt_Set63	1.12861	0	0.833333	NA	NA	NA	61
M_0.1_F_lpt_Set64	1.13521	0	0.833333	NA	NA	NA	70
M_0.1_F_lpt_Set7	1.12868	0	0.833333	NA	NA	NA	42
M_0.1_F_lpt_Set8	1.12516	0	0.833333	NA	NA	NA	42
M_0.1_F_lpt_Set9	1.11592	0	0.833333	NA	NA	NA	47
M_0.1_F_lph_Set1	1.12667	0	0.333333	NA	NA	NA	31
M_0.1_F_lph_Set10	1.08799	0	0.333333	NA	NA	NA	39
M_0.1_F_lph_Set11	1.08998	0	0.333333	NA	NA	NA	30
M_0.1_F_lph_Set12	1.09379	0	0.333333	NA	NA	NA	41
M_0.1_F_lph_Set13	1.19045	0	0.333333	NA	NA	NA	47
M_0.1_F_lph_Set14	1.13701	0	0.666667	NA	NA	NA	57
M_0.1_F_lph_Set15	1.22904	0	0.5	NA	NA	NA	53
M_0.1_F_lph_Set16	1.18632	0	0.666667	NA	NA	NA	56
M_0.1_F_lph_Set17	1.14007	0	0.333333	NA	NA	NA	28
M_0.1_F_lph_Set18	1.15908	0	0.333333	NA	NA	NA	39
M_0.1_F_lph_Set19	1.32222	0	0	NA	NA	NA	27
M_0.1_F_lph_Set2	1.15422	0	0.5	NA	NA	NA	57
M_0.1_F_lph_Set20	1.30834	0	0.166667	NA	NA	NA	31
M_0.1_F_lph_Set21	1.0908	0	0.333333	NA	NA	NA	46
M_0.1_F_lph_Set22	1.3208	0	0	NA	NA	NA	37
M_0.1_F_lph_Set23	1.31557	0	0.166667	NA	NA	NA	38
M_0.1_F_lph_Set24	1.13671	0	0.5	NA	NA	NA	39
M_0.1_F_lph_Set25	1.1072	0	0.5	NA	NA	NA	55
M_0.1_F_lph_Set26	1.14279	0	0.5	NA	NA	NA	50
M_0.1_F_lph_Set27	1.1374	0	0.166667	NA	NA	NA	43
M_0.1_F_lph_Set28	1.14776	0	0.333333	NA	NA	NA	40
M_0.1_F_lph_Set29	1.12621	0	0.666667	NA	NA	NA	50
M_0.1_F_lph_Set3	1.19704	0	0.5	NA	NA	NA	36
M_0.1_F_lph_Set30	1.21665	0	0.5	NA	NA	NA	67
M_0.1_F_lph_Set31	1.17745	0	0.5	NA	NA	NA	57
M_0.1_F_lph_Set32	1.19113	0	0.666667	NA	NA	NA	64
M_0.1_F_lph_Set33	1.19474	0	0.666667	NA	NA	NA	64
M_0.1_F_lph_Set34	1.30842	0	0.166667	NA	NA	NA	49
M_0.1_F_lph_Set35	1.22801	0	0.333333	NA	NA	NA	46
M_0.1_F_lph_Set36	1.20622	0	0.333333	NA	NA	NA	46
M_0.1_F_lph_Set37	1.11675	0	0.5	NA	NA	NA	64
M_0.1_F_lph_Set38	1.14941	0	0.5	NA	NA	NA	62
M_0.1_F_lph_Set39	1.09715	0	0.666667	NA	NA	NA	65
M_0.1_F_lph_Set4	1.32323	0	0.166667	NA	NA	NA	39
M_0.1_F_lph_Set40	1.15596	0	0.333333	NA	NA	NA	37
M_0.1_F_lph_Set41	1.12724	0	0.166667	NA	NA	NA	45
M_0.1_F_lph_Set42	1.17821	0	0.166667	NA	NA	NA	32
M_0.1_F_lph_Set43	1.13146	0	0.5	NA	NA	NA	43
M_0.1_F_lph_Set44	1.13994	0	0.333333	NA	NA	NA	47
M_0.1_F_lph_Set45	1.10871	0	0.333333	NA	NA	NA	46
M_0.1_F_lph_Set46	1.13146	0	0.166667	NA	NA	NA	46
M_0.1_F_lph_Set47	1.20685	0	0.5	NA	NA	NA	58
M_0.1_F_lph_Set48	1.20788	0	0.333333	NA	NA	NA	67
M_0.1_F_lph_Set49	1.20296	0	0.5	NA	NA	NA	59
M_0.1_F_lph_Set5	1.20935	0	0.333333	NA	NA	NA	42
M_0.1_F_lph_Set50	1.09458	0	0.333333	NA	NA	NA	45
M_0.1_F_lph_Set51	1.34089	0	0	NA	NA	NA	40
M_0.1_F_lph_Set52	1.31253	0	0.5	NA	NA	NA	47
M_0.1_F_lph_Set53	1.10723	0	0.5	NA	NA	NA	71
M_0.1_F_lph_Set54	1.12533	0	0.5	NA	NA	NA	70
M_0.1_F_lph_Set55	1.10949	0	0.666667	NA	NA	NA	65
M_0.1_F_lph_Set56	1.11394	0	0.666667	NA	NA	NA	65
M_0.1_F_lph_Set57	1.21781	0	0.166667	NA	NA	NA	55
M_0.1_F_lph_Set58	1.21885	0	0.166667	NA	NA	NA	55
M_0.1_F_lph_Set59	1.10467	0	0.5	NA	NA	NA	70
M_0.1_F_lph_Set6	1.12866	0	0.666667	NA	NA	NA	40
M_0.1_F_lph_Set60	1.17574	0	0.333333	NA	NA	NA	64
M_0.1_F_lph_Set61	1.1223	0	0.5	NA	NA	NA	64
M_0.1_F_lph_Set62	1.06621	0	0.333333	NA	NA	NA	53
M_0.1_F_lph_Set63	1.2258	0	0.166667	NA	NA	NA	45
M_0.1_F_lph_Set64	1.18524	0	0.5	NA	NA	NA	42
M_0.1_F_lph_Set7	1.11131	0	0.5	NA	NA	NA	54
M_0.1_F_lph_Set8	1.14297	0	0.166667	NA	NA	NA	23
M_0.1_F_lph_Set9	1.12787	0	0.5	NA	NA	NA	34
M_0.1_F_qpt_Set1	1.15529	0	0.833333	NA	NA	NA	47
M_0.1_F_qpt_Set10	1.17127	0	0.833333	NA	NA	NA	49
M_0.1_F_qpt_Set11	1.107	0	0.833333	NA	NA	NA	41
M_0.1_F_qpt_Set12	1.04121	0	0.833333	NA	NA	NA	44
M_0.1_F_qpt_Set13	1.10301	0	0.666667	NA	NA	NA	39
M_0.1_F_qpt_Set14	1.03316	0	0.833333	NA	NA	NA	41
M_0.1_F_qpt_Set15	1.20466	0	0.666667	NA	NA	NA	43
M_0.1_F_qpt_Set16	1.04866	0.69	0.833333	NA	NA	NA	44
M_0.1_F_qpt_Set17	1.06048	0	0.833333	NA	NA	NA	46
M_0.1_F_qpt_Set18	1.11449	0	0.833333	NA	NA	NA	43
M_0.1_F_qpt_Set19	1.21331	0	0.833333	NA	NA	NA	46
M_0.1_F_qpt_Set2	1.20667	0	0.833333	NA	NA	NA	44
M_0.1_F_qpt_Set20	1.0283	0	0.833333	NA	NA	NA	41
M_0.1_F_qpt_Set21	1.08937	0.65	0.833333	NA	NA	NA	54
M_0.1_F_qpt_Set22	1.28714	0	0.833333	NA	NA	NA	47
M_0.1_F_qpt_Set23	1.1379	0	0.833333	NA	NA	NA	48
M_0.1_F_qpt_Set24	1.0535	0	0.833333	NA	NA	NA	45
M_0.1_F_qpt_Set25	1.18631	0	0.833333	NA	NA	NA	47
M_0.1_F_qpt_Set26	1.14849	0	0.833333	NA	NA	NA	57
M_0.1_F_qpt_Set27	1.20625	0	0.833333	NA	NA	NA	57
M_0.1_F_qpt_Set28	1.11125	0	0.833333	NA	NA	NA	46
M_0.1_F_qpt_Set29	1.08563	0	0.833333	NA	NA	NA	57
M_0.1_F_qpt_Set3	1.23969	0	0.833333	NA	NA	NA	47
M_0.1_F_qpt_Set30	1.16634	0	0.833333	NA	NA	NA	50
M_0.1_F_qpt_Set31	1.1994	0	0.833333	NA	NA	NA	47
M_0.1_F_qpt_Set32	1.04823	0	0.833333	NA	NA	NA	56
M_0.1_F_qpt_Set33	1.04894	0	0.833333	NA	NA	NA	56
M_0.1_F_qpt_Set34	1.20036	0	0.833333	NA	NA	NA	53
M_0.1_F_qpt_Set35	1.10219	0	0.833333	NA	NA	NA	60
M_0.1_F_qpt_Set36	1.12204	0	0.833333	NA	NA	NA	60
M_0.1_F_qpt_Set37	1.12373	0	0.833333	NA	NA	NA	48
M_0.1_F_qpt_Set38	1.20468	0	0.833333	NA	NA	NA	44
M_0.1_F_qpt_Set39	1.08658	0.62	0.833333	NA	NA	NA	53
M_0.1_F_qpt_Set4	1.2402	0	0.833333	NA	NA	NA	49
M_0.1_F_qpt_Set40	1.15577	0	0.833333	NA	NA	NA	56
M_0.1_F_qpt_Set41	1.1697	0	0.833333	NA	NA	NA	57
M_0.1_F_qpt_Set42	1.12818	0	0.833333	NA	NA	NA	52
M_0.1_F_qpt_Set43	1.0297	0	0.833333	NA	NA	NA	56
M_0.1_F_qpt_Set44	1.16832	0	0.833333	NA	NA	NA	58
M_0.1_F_qpt_Set45	1.18705	0	0.833333	NA	NA	NA	56
M_0.1_F_qpt_Set46	1.1609	0	0.833333	NA	NA	NA	62
M_0.1_F_qpt_Set47	1.16311	0	0.666667	NA	NA	NA	50
M_0.1_F_qpt_Set48	1.12439	0	0.666667	NA	NA	NA	49
M_0.1_F_qpt_Set49	1.03092	0	0.833333	NA	NA	NA	53
M_0.1_F_qpt_Set5	1.27946	0	0.833333	NA	NA	NA	45
M_0.1_F_qpt_Set50	1.0537	0	0.833333	NA	NA	NA	58
M_0.1_F_qpt_Set51	1.35148	0	0.833333	NA	NA	NA	53
M_0.1_F_qpt_Set52	1.18526	0	0.833333	NA	NA	NA	57
M_0.1_F_qpt_Set53	1.21222	0	0.833333	NA	NA	NA	62
M_0.1_F_qpt_Set54	1.19068	0	0.833333	NA	NA	NA	55
M_0.1_F_qpt_Set55	1.08604	0	0.833333	NA	NA	NA	59
M_0.1_F_qpt_Set56	1.06859	0	0.833333	NA	NA	NA	59
M_0.1_F_qpt_Set57	1.15873	0	0.833333	NA	NA	NA	63
M_0.1_F_qpt_Set58	1.14567	0	0.833333	NA	NA	NA	63
M_0.1_F_qpt_Set59	1.15673	0	0.833333	NA	NA	NA	56
M_0.1_F_qpt_Set6	1.05691	0	0.833333	NA	NA	NA	47
M_0.1_F_qpt_Set60	1.16122	0	0.833333	NA	NA	NA	49
M_0.1_F_qpt_Set61	1.03502	0	0.833333	NA	NA	NA	58
M_0.1_F_qpt_Set62	1.25531	0	0.833333	NA	NA	NA	60
M_0.1_F_qpt_Set63	1.14969	0	0.833333	NA	NA	NA	60
M_0.1_F_qpt_Set64	1.13145	0	0.833333	NA	NA	NA	73
M_0.1_F_qpt_Set7	1.13025	0	0.833333	NA	NA	NA	42
M_0.1_F_qpt_Set8	1.10739	0	0.833333	NA	NA	NA	44
M_0.1_F_qpt_Set9	1.10996	0	0.833333	NA	NA	NA	47
M_0.1_F_qph_Set1	1.12507	0	0.333333	NA	NA	NA	31
M_0.1_F_qph_Set10	1.10456	0	0.333333	NA	NA	NA	42
M_0.1_F_qph_Set11	1.10589	0	0.333333	NA	NA	NA	30
M_0.1_F_qph_Set12	1.08776	0	0.333333	NA	NA	NA	41
M_0.1_F_qph_Set13	1.16083	0	0.333333	NA	NA	NA	45
M_0.1_F_qph_Set14	1.11822	0	0.666667	NA	NA	NA	59
M_0.1_F_qph_Set15	1.19515	0	0.5	NA	NA	NA	53
M_0.1_F_qph_Set16	1.15199	0	0.666667	NA	NA	NA	52
M_0.1_F_qph_Set17	1.14663	0	0.333333	NA	NA	NA	28
M_0.1_F_qph_Set18	1.14303	0	0.333333	NA	NA	NA	38
M_0.1_F_qph_Set19	1.32059	0	0	NA	NA	NA	26
M_0.1_F_qph_Set2	1.1673	0	0.5	NA	NA	NA	58
M_0.1_F_qph_Set20	1.30025	0	0.333333	NA	NA	NA	30
M_0.1_F_qph_Set21	1.09829	0	0.333333	NA	NA	NA	46
M_0.1_F_qph_Set22	1.36892	0	0	NA	NA	NA	42
M_0.1_F_qph_Set23	1.28962	0	0.166667	NA	NA	NA	39
M_0.1_F_qph_Set24	1.13065	0	0.5	NA	NA	NA	39
M_0.1_F_qph_Set25	1.10652	0	0.5	NA	NA	NA	60
M_0.1_F_qph_Set26	1.14041	0	0.5	NA	NA	NA	49
M_0.1_F_qph_Set27	1.19183	0	0.333333	NA	NA	NA	43
M_0.1_F_qph_Set28	1.12639	0	0.333333	NA	NA	NA	40
M_0.1_F_qph_Set29	1.11566	0	0.666667	NA	NA	NA	50
M_0.1_F_qph_Set3	1.19723	0	0.5	NA	NA	NA	36
M_0.1_F_qph_Set30	1.21617	0	0.5	NA	NA	NA	66
M_0.1_F_qph_Set31	1.17769	0	0.5	NA	NA	NA	57
M_0.1_F_qph_Set32	1.19324	0	0.666667	NA	NA	NA	62
M_0.1_F_qph_Set33	1.19262	0	0.666667	NA	NA	NA	62
M_0.1_F_qph_Set34	1.25817	0	0.166667	NA	NA	NA	45
M_0.1_F_qph_Set35	1.18352	0	0.333333	NA	NA	NA	46
M_0.1_F_qph_Set36	1.21837	0	0.333333	NA	NA	NA	46
M_0.1_F_qph_Set37	1.10849	0	0.5	NA	NA	NA	64
M_0.1_F_qph_Set38	1.12628	0	0.5	NA	NA	NA	62
M_0.1_F_qph_Set39	1.09752	0	0.666667	NA	NA	NA	64
M_0.1_F_qph_Set4	1.2773	0	0.166667	NA	NA	NA	36
M_0.1_F_qph_Set40	1.18364	0	0.333333	NA	NA	NA	37
M_0.1_F_qph_Set41	1.13343	0	0.166667	NA	NA	NA	45
M_0.1_F_qph_Set42	1.18288	0	0.166667	NA	NA	NA	32
M_0.1_F_qph_Set43	1.12391	0	0.5	NA	NA	NA	37
M_0.1_F_qph_Set44	1.14198	0	0.333333	NA	NA	NA	45
M_0.1_F_qph_Set45	1.1108	0	0.333333	NA	NA	NA	43
M_0.1_F_qph_Set46	1.11005	0	0.333333	NA	NA	NA	47
M_0.1_F_qph_Set47	1.22667	0	0.5	NA	NA	NA	58
M_0.1_F_qph_Set48	1.1428	0	0.333333	NA	NA	NA	67
M_0.1_F_qph_Set49	1.19646	0	0.5	NA	NA	NA	60
M_0.1_F_qph_Set5	1.2002	0	0.333333	NA	NA	NA	46
M_0.1_F_qph_Set50	1.0887	0	0.333333	NA	NA	NA	48
M_0.1_F_qph_Set51	1.35362	0	0	NA	NA	NA	38
M_0.1_F_qph_Set52	1.33475	0	0.5	NA	NA	NA	46
M_0.1_F_qph_Set53	1.11887	0	0.5	NA	NA	NA	71
M_0.1_F_qph_Set54	1.08868	0	0.5	NA	NA	NA	70
M_0.1_F_qph_Set55	1.12616	0	0.666667	NA	NA	NA	67
M_0.1_F_qph_Set56	1.10846	0	0.666667	NA	NA	NA	67
M_0.1_F_qph_Set57	1.22961	0	0.166667	NA	NA	NA	54
M_0.1_F_qph_Set58	1.2302	0	0.166667	NA	NA	NA	54
M_0.1_F_qph_Set59	1.13901	0	0.5	NA	NA	NA	68
M_0.1_F_qph_Set6	1.13482	0	0.666667	NA	NA	NA	45
M_0.1_F_qph_Set60	1.1251	0	0.333333	NA	NA	NA	64
M_0.1_F_qph_Set61	1.10644	0	0.5	NA	NA	NA	62
M_0.1_F_qph_Set62	1.10565	0	0.333333	NA	NA	NA	50
M_0.1_F_qph_Set63	1.20379	0	0.166667	NA	NA	NA	46
M_0.1_F_qph_Set64	1.14987	0	0.5	NA	NA	NA	42
M_0.1_F_qph_Set7	1.12244	0	0.5	NA	NA	NA	54
M_0.1_F_qph_Set8	1.15562	0	0.166667	NA	NA	NA	23
M_0.1_F_qph_Set9	1.1214	0	0.5	NA	NA	NA	34
M_0.1_F_qth_Set1	1.04736	0	0.833333	NA	NA	NA	49
M_0.1_F_qth_Set10	1.07903	0	0.833333	NA	NA	NA	52
M_0.1_F_qth_Set11	1.06415	0	0.833333	NA	NA	NA	47
M_0.1_F_qth_Set12	1.06787	0	0.833333	NA	NA	NA	50
M_0.1_F_qth_Set13	1.14199	0	0.666667	NA	NA	NA	44
M_0.1_F_qth_Set14	1.08829	0	0.833333	NA	NA	NA	57
M_0.1_F_qth_Set15	1.2368	0	0.833333	NA	NA	NA	50
M_0.1_F_qth_Set16	1.09687	0	0.833333	NA	NA	NA	45
M_0.1_F_qth_Set17	1.12708	0	0.833333	NA	NA	NA	51
M_0.1_F_qth_Set18	1.09417	0	0.833333	NA	NA	NA	48
M_0.1_F_qth_Set19	1.29435	0	0.833333	NA	NA	NA	50
M_0.1_F_qth_Set2	1.15409	0	0.833333	NA	NA	NA	43
M_0.1_F_qth_Set20	1.1214	0	0.833333	NA	NA	NA	47
M_0.1_F_qth_Set21	1.10021	0	0.833333	NA	NA	NA	60
M_0.1_F_qth_Set22	1.28611	0	0.833333	NA	NA	NA	50
M_0.1_F_qth_Set23	1.17661	0	0.833333	NA	NA	NA	51
M_0.1_F_qth_Set24	1.15234	0	0.833333	NA	NA	NA	49
M_0.1_F_qth_Set25	1.09146	0	0.833333	NA	NA	NA	55
M_0.1_F_qth_Set26	1.0901	0	0.833333	NA	NA	NA	66
M_0.1_F_qth_Set27	1.0695	0	0.833333	NA	NA	NA	58
M_0.1_F_qth_Set28	1.06153	0	0.833333	NA	NA	NA	56
M_0.1_F_qth_Set29	1.07403	0	0.833333	NA	NA	NA	61
M_0.1_F_qth_Set3	1.27892	0	0.833333	NA	NA	NA	57
M_0.1_F_qth_Set30	1.19656	0	0.833333	NA	NA	NA	58
M_0.1_F_qth_Set31	1.14025	0	0.833333	NA	NA	NA	58
M_0.1_F_qth_Set32	1.11346	0	0.833333	NA	NA	NA	53
M_0.1_F_qth_Set33	1.10797	0	0.833333	NA	NA	NA	53
M_0.1_F_qth_Set34	1.27239	0	0.833333	NA	NA	NA	64
M_0.1_F_qth_Set35	1.16182	0	0.833333	NA	NA	NA	59
M_0.1_F_qth_Set36	1.16334	0	0.833333	NA	NA	NA	59
M_0.1_F_qth_Set37	1.11249	0	0.833333	NA	NA	NA	63
M_0.1_F_qth_Set38	1.10608	0	0.833333	NA	NA	NA	60
M_0.1_F_qth_Set39	1.16997	0.66	0.833333	NA	NA	NA	61
M_0.1_F_qth_Set4	1.31762	0	0.833333	NA	NA	NA	51
M_0.1_F_qth_Set40	1.09949	0	0.833333	NA	NA	NA	64
M_0.1_F_qth_Set41	1.07018	0	0.833333	NA	NA	NA	68
M_0.1_F_qth_Set42	1.08151	0	0.833333	NA	NA	NA	56
M_0.1_F_qth_Set43	1.06184	0	0.833333	NA	NA	NA	60
M_0.1_F_qth_Set44	1.08728	0	0.833333	NA	NA	NA	67
M_0.1_F_qth_Set45	1.08033	0	0.833333	NA	NA	NA	61
M_0.1_F_qth_Set46	1.08275	0	0.833333	NA	NA	NA	63
M_0.1_F_qth_Set47	1.12845	0	0.666667	NA	NA	NA	60
M_0.1_F_qth_Set48	1.16054	0	0.833333	NA	NA	NA	59
M_0.1_F_qth_Set49	1.09979	0	0.833333	NA	NA	NA	53
M_0.1_F_qth_Set5	1.21456	0	0.833333	NA	NA	NA	47
M_0.1_F_qth_Set50	1.10314	0	0.833333	NA	NA	NA	65
M_0.1_F_qth_Set51	1.43654	0	0.833333	NA	NA	NA	59
M_0.1_F_qth_Set52	1.21833	0	0.833333	NA	NA	NA	65
M_0.1_F_qth_Set53	1.15994	0	0.833333	NA	NA	NA	69
M_0.1_F_qth_Set54	1.09577	0	0.833333	NA	NA	NA	63
M_0.1_F_qth_Set55	1.34034	0.7	0.833333	NA	NA	NA	62
M_0.1_F_qth_Set56	1.27179	0.67	0.833333	NA	NA	NA	62
M_0.1_F_qth_Set57	1.09324	0	0.833333	NA	NA	NA	63
M_0.1_F_qth_Set58	1.08117	0	0.833333	NA	NA	NA	63
M_0.1_F_qth_Set59	1.12322	0	0.833333	NA	NA	NA	57
M_0.1_F_qth_Set6	1.13105	0	0.833333	NA	NA	NA	49
M_0.1_F_qth_Set60	1.05822	0	0.833333	NA	NA	NA	65
M_0.1_F_qth_Set61	1.19983	0.63	0.833333	NA	NA	NA	64
M_0.1_F_qth_Set62	1.1211	0	0.833333	NA	NA	NA	70
M_0.1_F_qth_Set63	1.07514	0	0.833333	NA	NA	NA	67
M_0.1_F_qth_Set64	1.06591	0	0.833333	NA	NA	NA	68
M_0.1_F_qth_Set7	1.08143	0	0.833333	NA	NA	NA	47
M_0.1_F_qth_Set8	1.06581	0	0.833333	NA	NA	NA	49
M_0.1_F_qth_Set9	1.08541	0	0.833333	NA	NA	NA	55
M_0.1_F_pth_Set1	1.05386	0	0.833333	NA	NA	NA	49
M_0.1_F_pth_Set10	1.08946	0	0.833333	NA	NA	NA	52
M_0.1_F_pth_Set11	1.06437	0	0.833333	NA	NA	NA	47
M_0.1_F_pth_Set12	1.06469	0	0.833333	NA	NA	NA	50
M_0.1_F_pth_Set13	1.14243	0	0.666667	NA	NA	NA	44
M_0.1_F_pth_Set14	1.0871	0	0.833333	NA	NA	NA	57
M_0.1_F_pth_Set15	1.25231	0	0.833333	NA	NA	NA	50
M_0.1_F_pth_Set16	1.08923	0	0.833333	NA	NA	NA	47
M_0.1_F_pth_Set17	1.1267	0	0.833333	NA	NA	NA	51
M_0.1_F_pth_Set18	1.10547	0	0.833333	NA	NA	NA	48
M_0.1_F_pth_Set19	1.29196	0	0.833333	NA	NA	NA	50
M_0.1_F_pth_Set2	1.13919	0	0.833333	NA	NA	NA	43
M_0.1_F_pth_Set20	1.1214	0	0.833333	NA	NA	NA	47
M_0.1_F_pth_Set21	1.09052	0	0.833333	NA	NA	NA	60
M_0.1_F_pth_Set22	1.24469	0	0.833333	NA	NA	NA	49
M_0.1_F_pth_Set23	1.19864	0	0.833333	NA	NA	NA	52
M_0.1_F_pth_Set24	1.16057	0	0.833333	NA	NA	NA	49
M_0.1_F_pth_Set25	1.06611	0	0.833333	NA	NA	NA	55
M_0.1_F_pth_Set26	1.09729	0	0.833333	NA	NA	NA	66
M_0.1_F_pth_Set27	1.12599	0	0.833333	NA	NA	NA	60
M_0.1_F_pth_Set28	1.04172	0	0.833333	NA	NA	NA	56
M_0.1_F_pth_Set29	1.07863	0	0.833333	NA	NA	NA	61
M_0.1_F_pth_Set3	1.28908	0	0.833333	NA	NA	NA	57
M_0.1_F_pth_Set30	1.20926	0	0.833333	NA	NA	NA	59
M_0.1_F_pth_Set31	1.18014	0	0.833333	NA	NA	NA	58
M_0.1_F_pth_Set32	1.11976	0	0.833333	NA	NA	NA	54
M_0.1_F_pth_Set33	1.14315	0	0.833333	NA	NA	NA	54
M_0.1_F_pth_Set34	1.21841	0	0.833333	NA	NA	NA	64
M_0.1_F_pth_Set35	1.17703	0	0.833333	NA	NA	NA	62
M_0.1_F_pth_Set36	1.18302	0	0.833333	NA	NA	NA	62
M_0.1_F_pth_Set37	1.10527	0	0.833333	NA	NA	NA	63
M_0.1_F_pth_Set38	1.09352	0	0.833333	NA	NA	NA	60
M_0.1_F_pth_Set39	1.18751	0.66	0.833333	NA	NA	NA	61
M_0.1_F_pth_Set4	1.27366	0	0.833333	NA	NA	NA	53
M_0.1_F_pth_Set40	1.11167	0	0.833333	NA	NA	NA	64
M_0.1_F_pth_Set41	1.05442	0	0.833333	NA	NA	NA	68
M_0.1_F_pth_Set42	1.07174	0	0.833333	NA	NA	NA	56
M_0.1_F_pth_Set43	1.06595	0	0.833333	NA	NA	NA	60
M_0.1_F_pth_Set44	1.09963	0	0.833333	NA	NA	NA	67
M_0.1_F_pth_Set45	1.10295	0	0.833333	NA	NA	NA	60
M_0.1_F_pth_Set46	1.08367	0	0.833333	NA	NA	NA	64
M_0.1_F_pth_Set47	1.12094	0	0.666667	NA	NA	NA	60
M_0.1_F_pth_Set48	1.10658	0	0.833333	NA	NA	NA	59
M_0.1_F_pth_Set49	1.09979	0	0.833333	NA	NA	NA	53
M_0.1_F_pth_Set5	1.23655	0	0.833333	NA	NA	NA	47
M_0.1_F_pth_Set50	1.10373	0	0.833333	NA	NA	NA	65
M_0.1_F_pth_Set51	1.43563	0	0.833333	NA	NA	NA	59
M_0.1_F_pth_Set52	1.21904	0	0.833333	NA	NA	NA	67
M_0.1_F_pth_Set53	1.12811	0	0.833333	NA	NA	NA	71
M_0.1_F_pth_Set54	1.08894	0	0.833333	NA	NA	NA	63
M_0.1_F_pth_Set55	1.26997	0.64	0.833333	NA	NA	NA	62
M_0.1_F_pth_Set56	1.20605	0.69	0.833333	NA	NA	NA	62
M_0.1_F_pth_Set57	1.10741	0	0.833333	NA	NA	NA	65
M_0.1_F_pth_Set58	1.11688	0	0.833333	NA	NA	NA	65
M_0.1_F_pth_Set59	1.12412	0	0.833333	NA	NA	NA	60
M_0.1_F_pth_Set6	1.12972	0	0.833333	NA	NA	NA	49
M_0.1_F_pth_Set60	1.02399	0	0.833333	NA	NA	NA	66
M_0.1_F_pth_Set61	1.16975	0.61	0.833333	NA	NA	NA	69
M_0.1_F_pth_Set62	1.14293	0	0.833333	NA	NA	NA	70
M_0.1_F_pth_Set63	1.07559	0	0.833333	NA	NA	NA	67
M_0.1_F_pth_Set64	1.07746	0	0.833333	NA	NA	NA	71
M_0.1_F_pth_Set7	1.07166	0	0.833333	NA	NA	NA	47
M_0.1_F_pth_Set8	1.06012	0	0.833333	NA	NA	NA	49
M_0.1_F_pth_Set9	1.0733	0	0.833333	NA	NA	NA	55
M_0.1_F_lqpt_Set1	1.16533	0	0.833333	NA	NA	NA	47
M_0.1_F_lqpt_Set10	1.14604	0	0.833333	NA	NA	NA	49
M_0.1_F_lqpt_Set11	1.10297	0	0.833333	NA	NA	NA	41
M_0.1_F_lqpt_Set12	1.02956	0	0.833333	NA	NA	NA	44
M_0.1_F_lqpt_Set13	1.09258	0	0.666667	NA	NA	NA	39
M_0.1_F_lqpt_Set14	1.0157	0	0.833333	NA	NA	NA	41
M_0.1_F_lqpt_Set15	1.20253	0	0.666667	NA	NA	NA	43
M_0.1_F_lqpt_Set16	1.01561	0.62	0.833333	NA	NA	NA	44
M_0.1_F_lqpt_Set17	1.0867	0	0.833333	NA	NA	NA	46
M_0.1_F_lqpt_Set18	1.0944	0	0.833333	NA	NA	NA	43
M_0.1_F_lqpt_Set19	1.2074	0	0.833333	NA	NA	NA	46
M_0.1_F_lqpt_Set2	1.21443	0	0.833333	NA	NA	NA	44
M_0.1_F_lqpt_Set20	1.02981	0	0.833333	NA	NA	NA	41
M_0.1_F_lqpt_Set21	1.11479	0.64	0.833333	NA	NA	NA	54
M_0.1_F_lqpt_Set22	1.2676	0	0.833333	NA	NA	NA	47
M_0.1_F_lqpt_Set23	1.14725	0	0.833333	NA	NA	NA	48
M_0.1_F_lqpt_Set24	1.05697	0	0.833333	NA	NA	NA	45
M_0.1_F_lqpt_Set25	1.20236	0	0.833333	NA	NA	NA	47
M_0.1_F_lqpt_Set26	1.14869	0	0.833333	NA	NA	NA	57
M_0.1_F_lqpt_Set27	1.1935	0	0.833333	NA	NA	NA	57
M_0.1_F_lqpt_Set28	1.11007	0	0.833333	NA	NA	NA	46
M_0.1_F_lqpt_Set29	1.08731	0	0.833333	NA	NA	NA	57
M_0.1_F_lqpt_Set3	1.25213	0	0.833333	NA	NA	NA	47
M_0.1_F_lqpt_Set30	1.20576	0	0.833333	NA	NA	NA	50
M_0.1_F_lqpt_Set31	1.20472	0	0.833333	NA	NA	NA	47
M_0.1_F_lqpt_Set32	1.0633	0	0.833333	NA	NA	NA	56
M_0.1_F_lqpt_Set33	1.06905	0	0.833333	NA	NA	NA	56
M_0.1_F_lqpt_Set34	1.22318	0	0.833333	NA	NA	NA	53
M_0.1_F_lqpt_Set35	1.10602	0	0.833333	NA	NA	NA	60
M_0.1_F_lqpt_Set36	1.11219	0	0.833333	NA	NA	NA	60
M_0.1_F_lqpt_Set37	1.10937	0	0.833333	NA	NA	NA	48
M_0.1_F_lqpt_Set38	1.2044	0	0.833333	NA	NA	NA	44
M_0.1_F_lqpt_Set39	1.08409	0.75	0.833333	NA	NA	NA	53
M_0.1_F_lqpt_Set4	1.28227	0	0.833333	NA	NA	NA	49
M_0.1_F_lqpt_Set40	1.16615	0	0.833333	NA	NA	NA	56
M_0.1_F_lqpt_Set41	1.16577	0	0.833333	NA	NA	NA	57
M_0.1_F_lqpt_Set42	1.12412	0	0.833333	NA	NA	NA	52
M_0.1_F_lqpt_Set43	1.03673	0	0.833333	NA	NA	NA	56
M_0.1_F_lqpt_Set44	1.18245	0	0.833333	NA	NA	NA	58
M_0.1_F_lqpt_Set45	1.17799	0	0.833333	NA	NA	NA	56
M_0.1_F_lqpt_Set46	1.1719	0	0.833333	NA	NA	NA	62
M_0.1_F_lqpt_Set47	1.14306	0	0.666667	NA	NA	NA	50
M_0.1_F_lqpt_Set48	1.12653	0	0.666667	NA	NA	NA	49
M_0.1_F_lqpt_Set49	1.03358	0	0.833333	NA	NA	NA	53
M_0.1_F_lqpt_Set5	1.2666	0	0.833333	NA	NA	NA	45
M_0.1_F_lqpt_Set50	1.08187	0	0.833333	NA	NA	NA	58
M_0.1_F_lqpt_Set51	1.37648	0	0.833333	NA	NA	NA	53
M_0.1_F_lqpt_Set52	1.18924	0	0.833333	NA	NA	NA	57
M_0.1_F_lqpt_Set53	1.24174	0	0.833333	NA	NA	NA	62
M_0.1_F_lqpt_Set54	1.21061	0	0.833333	NA	NA	NA	55
M_0.1_F_lqpt_Set55	1.07896	0	0.833333	NA	NA	NA	59
M_0.1_F_lqpt_Set56	1.08326	0	0.833333	NA	NA	NA	59
M_0.1_F_lqpt_Set57	1.17039	0	0.833333	NA	NA	NA	63
M_0.1_F_lqpt_Set58	1.16456	0	0.833333	NA	NA	NA	63
M_0.1_F_lqpt_Set59	1.18655	0	0.833333	NA	NA	NA	56
M_0.1_F_lqpt_Set6	1.06217	0	0.833333	NA	NA	NA	47
M_0.1_F_lqpt_Set60	1.14142	0	0.833333	NA	NA	NA	49
M_0.1_F_lqpt_Set61	1.02026	0	0.833333	NA	NA	NA	58
M_0.1_F_lqpt_Set62	1.25489	0	0.833333	NA	NA	NA	60
M_0.1_F_lqpt_Set63	1.12817	0	0.833333	NA	NA	NA	60
M_0.1_F_lqpt_Set64	1.13107	0	0.833333	NA	NA	NA	73
M_0.1_F_lqpt_Set7	1.11998	0	0.833333	NA	NA	NA	42
M_0.1_F_lqpt_Set8	1.1059	0	0.833333	NA	NA	NA	44
M_0.1_F_lqpt_Set9	1.129	0	0.833333	NA	NA	NA	47
M_0.1_F_lqph_Set1	1.12693	0	0.333333	NA	NA	NA	31
M_0.1_F_lqph_Set10	1.14449	0	0.333333	NA	NA	NA	42
M_0.1_F_lqph_Set11	1.12971	0	0.333333	NA	NA	NA	30
M_0.1_F_lqph_Set12	1.1085	0	0.333333	NA	NA	NA	41
M_0.1_F_lqph_Set13	1.15704	0	0.333333	NA	NA	NA	45
M_0.1_F_lqph_Set14	1.13418	0	0.666667	NA	NA	NA	57
M_0.1_F_lqph_Set15	1.23038	0	0.5	NA	NA	NA	53
M_0.1_F_lqph_Set16	1.14888	0	0.666667	NA	NA	NA	56
M_0.1_F_lqph_Set17	1.11998	0	0.333333	NA	NA	NA	28
M_0.1_F_lqph_Set18	1.15506	0	0.333333	NA	NA	NA	38
M_0.1_F_lqph_Set19	1.32281	0	0	NA	NA	NA	27
M_0.1_F_lqph_Set2	1.19351	0	0.5	NA	NA	NA	58
M_0.1_F_lqph_Set20	1.30328	0	0.333333	NA	NA	NA	30
M_0.1_F_lqph_Set21	1.06644	0	0.333333	NA	NA	NA	46
M_0.1_F_lqph_Set22	1.34514	0	0	NA	NA	NA	37
M_0.1_F_lqph_Set23	1.29916	0	0.166667	NA	NA	NA	39
M_0.1_F_lqph_Set24	1.13406	0	0.5	NA	NA	NA	39
M_0.1_F_lqph_Set25	1.08934	0	0.5	NA	NA	NA	60
M_0.1_F_lqph_Set26	1.1368	0	0.5	NA	NA	NA	52
M_0.1_F_lqph_Set27	1.18112	0	0.333333	NA	NA	NA	43
M_0.1_F_lqph_Set28	1.15664	0	0.333333	NA	NA	NA	40
M_0.1_F_lqph_Set29	1.11745	0	0.666667	NA	NA	NA	50
M_0.1_F_lqph_Set3	1.18921	0	0.5	NA	NA	NA	36
M_0.1_F_lqph_Set30	1.21333	0	0.5	NA	NA	NA	66
M_0.1_F_lqph_Set31	1.19403	0	0.5	NA	NA	NA	57
M_0.1_F_lqph_Set32	1.18476	0	0.666667	NA	NA	NA	62
M_0.1_F_lqph_Set33	1.18559	0	0.666667	NA	NA	NA	62
M_0.1_F_lqph_Set34	1.26503	0	0.166667	NA	NA	NA	45
M_0.1_F_lqph_Set35	1.1703	0	0.333333	NA	NA	NA	46
M_0.1_F_lqph_Set36	1.17987	0	0.333333	NA	NA	NA	46
M_0.1_F_lqph_Set37	1.12935	0	0.5	NA	NA	NA	64
M_0.1_F_lqph_Set38	1.19039	0	0.5	NA	NA	NA	62
M_0.1_F_lqph_Set39	1.07855	0	0.666667	NA	NA	NA	64
M_0.1_F_lqph_Set4	1.25837	0	0.166667	NA	NA	NA	37
M_0.1_F_lqph_Set40	1.16716	0	0.333333	NA	NA	NA	37
M_0.1_F_lqph_Set41	1.12018	0	0.166667	NA	NA	NA	45
M_0.1_F_lqph_Set42	1.15231	0	0.166667	NA	NA	NA	32
M_0.1_F_lqph_Set43	1.1419	0	0.5	NA	NA	NA	37
M_0.1_F_lqph_Set44	1.13573	0	0.333333	NA	NA	NA	47
M_0.1_F_lqph_Set45	1.171	0	0.333333	NA	NA	NA	43
M_0.1_F_lqph_Set46	1.10909	0	0.333333	NA	NA	NA	47
M_0.1_F_lqph_Set47	1.21869	0	0.5	NA	NA	NA	58
M_0.1_F_lqph_Set48	1.16293	0	0.333333	NA	NA	NA	67
M_0.1_F_lqph_Set49	1.18529	0	0.5	NA	NA	NA	56
M_0.1_F_lqph_Set5	1.19098	0	0.333333	NA	NA	NA	46
M_0.1_F_lqph_Set50	1.08181	0	0.333333	NA	NA	NA	48
M_0.1_F_lqph_Set51	1.35692	0	0	NA	NA	NA	41
M_0.1_F_lqph_Set52	1.30638	0	0.5	NA	NA	NA	45
M_0.1_F_lqph_Set53	1.11164	0	0.5	NA	NA	NA	71
M_0.1_F_lqph_Set54	1.13509	0	0.5	NA	NA	NA	70
M_0.1_F_lqph_Set55	1.08488	0	0.666667	NA	NA	NA	67
M_0.1_F_lqph_Set56	1.11797	0	0.666667	NA	NA	NA	67
M_0.1_F_lqph_Set57	1.22604	0	0.166667	NA	NA	NA	56
M_0.1_F_lqph_Set58	1.2111	0	0.166667	NA	NA	NA	56
M_0.1_F_lqph_Set59	1.1298	0	0.5	NA	NA	NA	68
M_0.1_F_lqph_Set6	1.13915	0	0.666667	NA	NA	NA	42
M_0.1_F_lqph_Set60	1.15712	0	0.333333	NA	NA	NA	78
M_0.1_F_lqph_Set61	1.10737	0	0.5	NA	NA	NA	66
M_0.1_F_lqph_Set62	1.11434	0	0.333333	NA	NA	NA	50
M_0.1_F_lqph_Set63	1.20941	0	0.166667	NA	NA	NA	46
M_0.1_F_lqph_Set64	1.17854	0	0.5	NA	NA	NA	42
M_0.1_F_lqph_Set7	1.09104	0	0.5	NA	NA	NA	54
M_0.1_F_lqph_Set8	1.1296	0	0.166667	NA	NA	NA	23
M_0.1_F_lqph_Set9	1.13124	0	0.5	NA	NA	NA	34
M_0.1_F_lqth_Set1	1.05992	0	0.833333	NA	NA	NA	49
M_0.1_F_lqth_Set10	1.07621	0	0.833333	NA	NA	NA	52
M_0.1_F_lqth_Set11	1.04389	0	0.833333	NA	NA	NA	47
M_0.1_F_lqth_Set12	1.06548	0	0.833333	NA	NA	NA	50
M_0.1_F_lqth_Set13	1.13883	0	0.666667	NA	NA	NA	44
M_0.1_F_lqth_Set14	1.10256	0	0.833333	NA	NA	NA	57
M_0.1_F_lqth_Set15	1.23716	0	0.833333	NA	NA	NA	50
M_0.1_F_lqth_Set16	1.08087	0	0.833333	NA	NA	NA	45
M_0.1_F_lqth_Set17	1.11572	0	0.833333	NA	NA	NA	51
M_0.1_F_lqth_Set18	1.08674	0	0.833333	NA	NA	NA	48
M_0.1_F_lqth_Set19	1.29502	0	0.833333	NA	NA	NA	50
M_0.1_F_lqth_Set2	1.15114	0	0.833333	NA	NA	NA	43
M_0.1_F_lqth_Set20	1.11804	0	0.833333	NA	NA	NA	47
M_0.1_F_lqth_Set21	1.09283	0	0.833333	NA	NA	NA	60
M_0.1_F_lqth_Set22	1.28968	0	0.833333	NA	NA	NA	50
M_0.1_F_lqth_Set23	1.19709	0	0.833333	NA	NA	NA	51
M_0.1_F_lqth_Set24	1.13978	0	0.833333	NA	NA	NA	49
M_0.1_F_lqth_Set25	1.07699	0	0.833333	NA	NA	NA	55
M_0.1_F_lqth_Set26	1.09666	0	0.833333	NA	NA	NA	66
M_0.1_F_lqth_Set27	1.08445	0	0.833333	NA	NA	NA	58
M_0.1_F_lqth_Set28	1.04683	0	0.833333	NA	NA	NA	56
M_0.1_F_lqth_Set29	1.08061	0	0.833333	NA	NA	NA	61
M_0.1_F_lqth_Set3	1.28028	0	0.833333	NA	NA	NA	57
M_0.1_F_lqth_Set30	1.19778	0	0.833333	NA	NA	NA	58
M_0.1_F_lqth_Set31	1.2109	0	0.833333	NA	NA	NA	58
M_0.1_F_lqth_Set32	1.11897	0	0.833333	NA	NA	NA	53
M_0.1_F_lqth_Set33	1.11398	0	0.833333	NA	NA	NA	53
M_0.1_F_lqth_Set34	1.22352	0	0.833333	NA	NA	NA	64
M_0.1_F_lqth_Set35	1.17131	0	0.833333	NA	NA	NA	59
M_0.1_F_lqth_Set36	1.16515	0	0.833333	NA	NA	NA	59
M_0.1_F_lqth_Set37	1.09842	0	0.833333	NA	NA	NA	63
M_0.1_F_lqth_Set38	1.08079	0	0.833333	NA	NA	NA	60
M_0.1_F_lqth_Set39	1.19825	0.74	0.833333	NA	NA	NA	61
M_0.1_F_lqth_Set4	1.29401	0	0.833333	NA	NA	NA	51
M_0.1_F_lqth_Set40	1.1001	0	0.833333	NA	NA	NA	64
M_0.1_F_lqth_Set41	1.05794	0	0.833333	NA	NA	NA	68
M_0.1_F_lqth_Set42	1.06917	0	0.833333	NA	NA	NA	56
M_0.1_F_lqth_Set43	1.06547	0	0.833333	NA	NA	NA	60
M_0.1_F_lqth_Set44	1.09782	0	0.833333	NA	NA	NA	67
M_0.1_F_lqth_Set45	1.08241	0	0.833333	NA	NA	NA	61
M_0.1_F_lqth_Set46	1.08633	0	0.833333	NA	NA	NA	63
M_0.1_F_lqth_Set47	1.12738	0	0.666667	NA	NA	NA	60
M_0.1_F_lqth_Set48	1.12524	0	0.833333	NA	NA	NA	59
M_0.1_F_lqth_Set49	1.09691	0	0.833333	NA	NA	NA	53
M_0.1_F_lqth_Set5	1.22732	0	0.833333	NA	NA	NA	47
M_0.1_F_lqth_Set50	1.13206	0	0.833333	NA	NA	NA	65
M_0.1_F_lqth_Set51	1.44189	0	0.833333	NA	NA	NA	59
M_0.1_F_lqth_Set52	1.22299	0	0.833333	NA	NA	NA	65
M_0.1_F_lqth_Set53	1.14587	0	0.833333	NA	NA	NA	69
M_0.1_F_lqth_Set54	1.09499	0	0.833333	NA	NA	NA	63
M_0.1_F_lqth_Set55	1.22227	0.77	0.833333	NA	NA	NA	62
M_0.1_F_lqth_Set56	1.22219	0.65	0.833333	NA	NA	NA	62
M_0.1_F_lqth_Set57	1.09038	0	0.833333	NA	NA	NA	63
M_0.1_F_lqth_Set58	1.08171	0	0.833333	NA	NA	NA	63
M_0.1_F_lqth_Set59	1.08847	0	0.833333	NA	NA	NA	57
M_0.1_F_lqth_Set6	1.14107	0	0.833333	NA	NA	NA	49
M_0.1_F_lqth_Set60	1.07357	0	0.833333	NA	NA	NA	65
M_0.1_F_lqth_Set61	1.14687	0.62	0.833333	NA	NA	NA	64
M_0.1_F_lqth_Set62	1.16595	0	0.833333	NA	NA	NA	70
M_0.1_F_lqth_Set63	1.07441	0	0.833333	NA	NA	NA	69
M_0.1_F_lqth_Set64	1.07804	0	0.833333	NA	NA	NA	68
M_0.1_F_lqth_Set7	1.07885	0	0.833333	NA	NA	NA	47
M_0.1_F_lqth_Set8	1.06188	0	0.833333	NA	NA	NA	49
M_0.1_F_lqth_Set9	1.07564	0	0.833333	NA	NA	NA	55
M_0.1_F_lpth_Set1	1.05498	0	0.833333	NA	NA	NA	49
M_0.1_F_lpth_Set10	1.09155	0	0.833333	NA	NA	NA	52
M_0.1_F_lpth_Set11	1.06066	0	0.833333	NA	NA	NA	47
M_0.1_F_lpth_Set12	1.06757	0	0.833333	NA	NA	NA	50
M_0.1_F_lpth_Set13	1.12358	0	0.666667	NA	NA	NA	44
M_0.1_F_lpth_Set14	1.0813	0	0.833333	NA	NA	NA	57
M_0.1_F_lpth_Set15	1.2369	0	0.833333	NA	NA	NA	50
M_0.1_F_lpth_Set16	1.08651	0	0.833333	NA	NA	NA	47
M_0.1_F_lpth_Set17	1.13029	0	0.833333	NA	NA	NA	51
M_0.1_F_lpth_Set18	1.08078	0	0.833333	NA	NA	NA	48
M_0.1_F_lpth_Set19	1.28727	0	0.833333	NA	NA	NA	50
M_0.1_F_lpth_Set2	1.1998	0	0.833333	NA	NA	NA	43
M_0.1_F_lpth_Set20	1.12588	0	0.833333	NA	NA	NA	47
M_0.1_F_lpth_Set21	1.10018	0	0.833333	NA	NA	NA	60
M_0.1_F_lpth_Set22	1.29487	0	0.833333	NA	NA	NA	49
M_0.1_F_lpth_Set23	1.18387	0	0.833333	NA	NA	NA	52
M_0.1_F_lpth_Set24	1.15252	0	0.833333	NA	NA	NA	49
M_0.1_F_lpth_Set25	1.0827	0	0.833333	NA	NA	NA	55
M_0.1_F_lpth_Set26	1.10268	0	0.833333	NA	NA	NA	66
M_0.1_F_lpth_Set27	1.13515	0	0.833333	NA	NA	NA	60
M_0.1_F_lpth_Set28	1.041	0	0.833333	NA	NA	NA	56
M_0.1_F_lpth_Set29	1.07154	0	0.833333	NA	NA	NA	61
M_0.1_F_lpth_Set3	1.29305	0	0.833333	NA	NA	NA	57
M_0.1_F_lpth_Set30	1.18972	0	0.833333	NA	NA	NA	59
M_0.1_F_lpth_Set31	1.18712	0	0.833333	NA	NA	NA	58
M_0.1_F_lpth_Set32	1.11986	0	0.833333	NA	NA	NA	54
M_0.1_F_lpth_Set33	1.14694	0	0.833333	NA	NA	NA	54
M_0.1_F_lpth_Set34	1.19936	0	0.833333	NA	NA	NA	64
M_0.1_F_lpth_Set35	1.18982	0	0.833333	NA	NA	NA	62
M_0.1_F_lpth_Set36	1.18242	0	0.833333	NA	NA	NA	62
M_0.1_F_lpth_Set37	1.1053	0	0.833333	NA	NA	NA	63
M_0.1_F_lpth_Set38	1.07492	0	0.833333	NA	NA	NA	60
M_0.1_F_lpth_Set39	1.18751	0.66	0.833333	NA	NA	NA	61
M_0.1_F_lpth_Set4	1.34291	0	0.833333	NA	NA	NA	53
M_0.1_F_lpth_Set40	1.11323	0	0.833333	NA	NA	NA	64
M_0.1_F_lpth_Set41	1.05898	0	0.833333	NA	NA	NA	68
M_0.1_F_lpth_Set42	1.08496	0	0.833333	NA	NA	NA	56
M_0.1_F_lpth_Set43	1.05822	0	0.833333	NA	NA	NA	60
M_0.1_F_lpth_Set44	1.10036	0	0.833333	NA	NA	NA	67
M_0.1_F_lpth_Set45	1.10274	0	0.833333	NA	NA	NA	60
M_0.1_F_lpth_Set46	1.09777	0	0.833333	NA	NA	NA	64
M_0.1_F_lpth_Set47	1.13233	0	0.666667	NA	NA	NA	60
M_0.1_F_lpth_Set48	1.14406	0	0.833333	NA	NA	NA	59
M_0.1_F_lpth_Set49	1.09979	0	0.833333	NA	NA	NA	53
M_0.1_F_lpth_Set5	1.21976	0	0.833333	NA	NA	NA	47
M_0.1_F_lpth_Set50	1.10666	0	0.833333	NA	NA	NA	65
M_0.1_F_lpth_Set51	1.44492	0	0.833333	NA	NA	NA	59
M_0.1_F_lpth_Set52	1.22137	0	0.833333	NA	NA	NA	67
M_0.1_F_lpth_Set53	1.1492	0	0.833333	NA	NA	NA	71
M_0.1_F_lpth_Set54	1.10709	0	0.833333	NA	NA	NA	63
M_0.1_F_lpth_Set55	1.31638	0.76	0.833333	NA	NA	NA	62
M_0.1_F_lpth_Set56	1.28389	0.62	0.833333	NA	NA	NA	62
M_0.1_F_lpth_Set57	1.10301	0	0.833333	NA	NA	NA	65
M_0.1_F_lpth_Set58	1.13538	0	0.833333	NA	NA	NA	65
M_0.1_F_lpth_Set59	1.12995	0	0.833333	NA	NA	NA	60
M_0.1_F_lpth_Set6	1.13948	0	0.833333	NA	NA	NA	49
M_0.1_F_lpth_Set60	1.09046	0	0.833333	NA	NA	NA	66
M_0.1_F_lpth_Set61	1.16022	0.73	0.833333	NA	NA	NA	69
M_0.1_F_lpth_Set62	1.11293	0	0.833333	NA	NA	NA	70
M_0.1_F_lpth_Set63	1.06089	0	0.833333	NA	NA	NA	67
M_0.1_F_lpth_Set64	1.08142	0	0.833333	NA	NA	NA	71
M_0.1_F_lpth_Set7	1.08376	0	0.833333	NA	NA	NA	47
M_0.1_F_lpth_Set8	1.07028	0	0.833333	NA	NA	NA	49
M_0.1_F_lpth_Set9	1.06708	0	0.833333	NA	NA	NA	55
M_0.1_F_lqpth_Set1	1.05512	0	0.833333	NA	NA	NA	49
M_0.1_F_lqpth_Set10	1.08455	0	0.833333	NA	NA	NA	52
M_0.1_F_lqpth_Set11	1.04359	0	0.833333	NA	NA	NA	47
M_0.1_F_lqpth_Set12	1.06531	0	0.833333	NA	NA	NA	50
M_0.1_F_lqpth_Set13	1.13967	0	0.666667	NA	NA	NA	44
M_0.1_F_lqpth_Set14	1.09089	0	0.833333	NA	NA	NA	57
M_0.1_F_lqpth_Set15	1.25594	0	0.833333	NA	NA	NA	50
M_0.1_F_lqpth_Set16	1.07393	0	0.833333	NA	NA	NA	48
M_0.1_F_lqpth_Set17	1.12142	0	0.833333	NA	NA	NA	51
M_0.1_F_lqpth_Set18	1.09044	0	0.833333	NA	NA	NA	48
M_0.1_F_lqpth_Set19	1.29761	0	0.833333	NA	NA	NA	50
M_0.1_F_lqpth_Set2	1.13581	0	0.833333	NA	NA	NA	43
M_0.1_F_lqpth_Set20	1.12252	0	0.833333	NA	NA	NA	47
M_0.1_F_lqpth_Set21	1.08194	0	0.833333	NA	NA	NA	60
M_0.1_F_lqpth_Set22	1.28623	0	0.833333	NA	NA	NA	52
M_0.1_F_lqpth_Set23	1.17538	0	0.833333	NA	NA	NA	52
M_0.1_F_lqpth_Set24	1.1483	0	0.833333	NA	NA	NA	49
M_0.1_F_lqpth_Set25	1.08449	0	0.833333	NA	NA	NA	55
M_0.1_F_lqpth_Set26	1.10493	0	0.833333	NA	NA	NA	66
M_0.1_F_lqpth_Set27	1.1373	0	0.833333	NA	NA	NA	58
M_0.1_F_lqpth_Set28	1.06906	0	0.833333	NA	NA	NA	56
M_0.1_F_lqpth_Set29	1.07159	0	0.833333	NA	NA	NA	61
M_0.1_F_lqpth_Set3	1.27742	0	0.833333	NA	NA	NA	57
M_0.1_F_lqpth_Set30	1.20611	0	0.833333	NA	NA	NA	58
M_0.1_F_lqpth_Set31	1.18782	0	0.833333	NA	NA	NA	58
M_0.1_F_lqpth_Set32	1.10889	0	0.833333	NA	NA	NA	53
M_0.1_F_lqpth_Set33	1.12565	0	0.833333	NA	NA	NA	53
M_0.1_F_lqpth_Set34	1.26123	0	0.833333	NA	NA	NA	64
M_0.1_F_lqpth_Set35	1.16551	0	0.833333	NA	NA	NA	62
M_0.1_F_lqpth_Set36	1.17017	0	0.833333	NA	NA	NA	62
M_0.1_F_lqpth_Set37	1.0993	0	0.833333	NA	NA	NA	63
M_0.1_F_lqpth_Set38	1.09609	0	0.833333	NA	NA	NA	60
M_0.1_F_lqpth_Set39	1.17177	0.66	0.833333	NA	NA	NA	61
M_0.1_F_lqpth_Set4	1.27938	0	0.833333	NA	NA	NA	53
M_0.1_F_lqpth_Set40	1.11941	0	0.833333	NA	NA	NA	64
M_0.1_F_lqpth_Set41	1.0544	0	0.833333	NA	NA	NA	68
M_0.1_F_lqpth_Set42	1.08851	0	0.833333	NA	NA	NA	56
M_0.1_F_lqpth_Set43	1.07367	0	0.833333	NA	NA	NA	60
M_0.1_F_lqpth_Set44	1.10612	0	0.833333	NA	NA	NA	67
M_0.1_F_lqpth_Set45	1.07659	0	0.833333	NA	NA	NA	60
M_0.1_F_lqpth_Set46	1.07748	0	0.833333	NA	NA	NA	65
M_0.1_F_lqpth_Set47	1.14923	0	0.666667	NA	NA	NA	60
M_0.1_F_lqpth_Set48	1.16617	0	0.833333	NA	NA	NA	59
M_0.1_F_lqpth_Set49	1.09906	0	0.833333	NA	NA	NA	53
M_0.1_F_lqpth_Set5	1.23302	0	0.833333	NA	NA	NA	47
M_0.1_F_lqpth_Set50	1.10781	0	0.833333	NA	NA	NA	65
M_0.1_F_lqpth_Set51	1.44115	0	0.833333	NA	NA	NA	59
M_0.1_F_lqpth_Set52	1.21904	0	0.833333	NA	NA	NA	65
M_0.1_F_lqpth_Set53	1.15381	0	0.833333	NA	NA	NA	71
M_0.1_F_lqpth_Set54	1.06965	0	0.833333	NA	NA	NA	63
M_0.1_F_lqpth_Set55	1.23841	0.69	0.833333	NA	NA	NA	62
M_0.1_F_lqpth_Set56	1.26478	0.67	0.833333	NA	NA	NA	62
M_0.1_F_lqpth_Set57	1.15475	0	0.833333	NA	NA	NA	65
M_0.1_F_lqpth_Set58	1.10577	0	0.833333	NA	NA	NA	65
M_0.1_F_lqpth_Set59	1.11793	0	0.833333	NA	NA	NA	59
M_0.1_F_lqpth_Set6	1.1297	0	0.833333	NA	NA	NA	49
M_0.1_F_lqpth_Set60	1.07065	0	0.833333	NA	NA	NA	64
M_0.1_F_lqpth_Set61	1.17293	0.76	0.833333	NA	NA	NA	68
M_0.1_F_lqpth_Set62	1.12399	0	0.833333	NA	NA	NA	70
M_0.1_F_lqpth_Set63	1.0719	0	0.833333	NA	NA	NA	67
M_0.1_F_lqpth_Set64	1.0806	0	0.833333	NA	NA	NA	71
M_0.1_F_lqpth_Set7	1.09066	0	0.833333	NA	NA	NA	47
M_0.1_F_lqpth_Set8	1.06205	0	0.833333	NA	NA	NA	49
M_0.1_F_lqpth_Set9	1.07386	0	0.833333	NA	NA	NA	55
M_0.2_F_l_Set1	1.13651	0	0.166667	271.684	8.23707	3.34239e-07	2
M_0.2_F_l_Set10	1.14568	0	0.166667	271.688	8.24203	3.33418e-07	2
M_0.2_F_l_Set11	1.18433	0	0	271.022	7.57552	4.65295e-07	2
M_0.2_F_l_Set12	1.29867	0	0	270.899	7.45223	4.9489e-07	2
M_0.2_F_l_Set13	1.17549	0	0.166667	273.198	9.75149	1.56761e-07	2
M_0.2_F_l_Set14	1.42579	0	0	272.435	8.98855	2.29572e-07	2
M_0.2_F_l_Set15	1.2254	0	0	271.869	8.42264	3.04659e-07	2
M_0.2_F_l_Set16	1.58296	0	0	272.672	9.22541	2.0394e-07	2
M_0.2_F_l_Set17	1.28391	0	0	276.159	12.7124	3.56716e-08	2
M_0.2_F_l_Set18	1.23149	0	0	275.88	12.4339	4.10019e-08	2
M_0.2_F_l_Set19	1.23917	0	0	275.503	12.0567	4.95126e-08	2
M_0.2_F_l_Set2	1.12574	0	0.333333	273.637	10.1908	1.25865e-07	2
M_0.2_F_l_Set20	1.2978	0	0	274.593	11.1462	7.80647e-08	2
M_0.2_F_l_Set21	1.30392	0	0	274.356	10.9091	8.78928e-08	2
M_0.2_F_l_Set22	1.28368	0	0.166667	273.185	9.73849	1.57816e-07	2
M_0.2_F_l_Set23	1.40851	0	0	273.588	10.1416	1.29013e-07	2
M_0.2_F_l_Set24	1.17456	0	0.333333	275.835	12.3882	4.19549e-08	2
M_0.2_F_l_Set25	1.17675	0	0.166667	274.161	10.715	9.68553e-08	3
M_0.2_F_l_Set26	1.25549	0	0.166667	273.247	9.80082	1.52986e-07	3
M_0.2_F_l_Set27	1.13643	0	0.166667	274.169	10.7222	9.6511e-08	3
M_0.2_F_l_Set28	1.19663	0	0	273.667	10.2203	1.24043e-07	3
M_0.2_F_l_Set29	1.28731	0	0	273.542	10.0957	1.32025e-07	3
M_0.2_F_l_Set3	1.09288	0.03	0	272.145	8.69885	2.65446e-07	0
M_0.2_F_l_Set30	1.43284	0	0	272.435	8.98855	2.29657e-07	2
M_0.2_F_l_Set31	1.22318	0	0	274.48	11.0338	8.25981e-08	3
M_0.2_F_l_Set32	1.57616	0	0	272.672	9.22541	2.04015e-07	2
M_0.2_F_l_Set33	1.5799	0	0	272.672	9.22541	2.0402e-07	2
M_0.2_F_l_Set34	1.3203	0	0.166667	275.842	12.3957	4.1809e-08	3
M_0.2_F_l_Set35	1.40445	0	0	273.588	10.1416	1.29047e-07	2
M_0.2_F_l_Set36	1.40362	0	0	273.588	10.1416	1.2905e-07	2
M_0.2_F_l_Set37	1.38771	0	0	272.786	9.33968	1.92705e-07	3
M_0.2_F_l_Set38	1.27903	0	0	273.017	9.57037	1.71715e-07	3
M_0.2_F_l_Set39	1.49532	0	0	273.425	9.97893	1.39991e-07	3
M_0.2_F_l_Set4	1.37208	0	0	275.622	12.176	4.66686e-08	2
M_0.2_F_l_Set40	1.24572	0	0	273.111	9.66442	1.63837e-07	3
M_0.2_F_l_Set41	1.13673	0	0.166667	271.688	8.24203	3.33649e-07	2
M_0.2_F_l_Set42	1.18036	0	0	273.598	10.1512	1.28451e-07	3
M_0.2_F_l_Set43	1.32218	0	0	273.556	10.11	1.31127e-07	3
M_0.2_F_l_Set44	1.25656	0	0.166667	270.581	7.13458	5.80492e-07	2
M_0.2_F_l_Set45	1.20092	0	0	271.022	7.57552	4.65646e-07	2
M_0.2_F_l_Set46	1.286	0	0	270.899	7.45223	4.95263e-07	2
M_0.2_F_l_Set47	1.42905	0	0	272.435	8.98855	2.29741e-07	2
M_0.2_F_l_Set48	1.23008	0	0	271.869	8.42264	3.04883e-07	2
M_0.2_F_l_Set49	1.58183	0	0	275.318	11.8715	5.43545e-08	3
M_0.2_F_l_Set5	1.14791	0	0	276.481	13.0349	3.03811e-08	2
M_0.2_F_l_Set50	1.32104	0	0	276.913	13.4664	2.44858e-08	3
M_0.2_F_l_Set51	1.25465	0	0.166667	275.544	12.0977	4.85438e-08	3
M_0.2_F_l_Set52	1.42499	0	0	276.174	12.7273	3.5434e-08	3
M_0.2_F_l_Set53	1.40841	0	0	272.786	9.33968	1.92776e-07	3
M_0.2_F_l_Set54	1.28303	0	0	275.976	12.5291	3.91287e-08	4
M_0.2_F_l_Set55	1.49731	0	0	276.353	12.9067	3.23963e-08	4
M_0.2_F_l_Set56	1.50716	0	0	276.353	12.9067	3.2397e-08	4
M_0.2_F_l_Set57	1.20512	0	0	273.667	10.2203	1.24124e-07	3
M_0.2_F_l_Set58	1.18956	0	0	273.667	10.2203	1.24127e-07	3
M_0.2_F_l_Set59	1.3907	0	0	272.786	9.33968	1.928e-07	3
M_0.2_F_l_Set6	1.16239	0	0.333333	275.647	12.2008	4.61138e-08	2
M_0.2_F_l_Set60	1.2588	0	0	273.017	9.57037	1.71802e-07	3
M_0.2_F_l_Set61	1.49901	0	0	273.425	9.97893	1.40062e-07	3
M_0.2_F_l_Set62	1.19259	0	0	273.111	9.66442	1.63918e-07	3
M_0.2_F_l_Set63	1.19251	0	0	273.598	10.1512	1.28511e-07	3
M_0.2_F_l_Set64	1.31352	0	0	276.513	13.0665	2.99157e-08	4
M_0.2_F_l_Set7	1.21117	0	0	272.074	8.62739	2.75322e-07	2
M_0.2_F_l_Set8	1.14674	0	0.166667	271.954	8.50758	2.92325e-07	2
M_0.2_F_l_Set9	1.22988	0	0.166667	270.581	7.13458	5.80788e-07	2
M_0.2_F_q_Set1	1.13787	0	0.166667	271.96	8.51348	2.91475e-07	2
M_0.2_F_q_Set10	1.14089	0	0.166667	270.726	7.27977	5.4014e-07	2
M_0.2_F_q_Set11	1.17269	0	0.166667	271.24	7.7934	4.17814e-07	2
M_0.2_F_q_Set12	1.1886	0	0.166667	271.19	7.74347	4.28384e-07	2
M_0.2_F_q_Set13	1.10583	0	0	275.018	11.5718	6.31743e-08	2
M_0.2_F_q_Set14	1.39304	0	0	274.614	11.1675	7.73274e-08	2
M_0.2_F_q_Set15	1.27852	0	0	274.655	11.209	7.57412e-08	2
M_0.2_F_q_Set16	1.43418	0	0	274.966	11.5193	6.48574e-08	2
M_0.2_F_q_Set17	1.30859	0	0	275.86	12.414	4.14648e-08	2
M_0.2_F_q_Set18	1.10617	0	0	276.238	12.7913	3.43375e-08	2
M_0.2_F_q_Set19	1.21964	0	0	276.144	12.698	3.59779e-08	2
M_0.2_F_q_Set2	1.09261	0	0.166667	274.909	11.4628	6.67195e-08	2
M_0.2_F_q_Set20	1.37184	0	0	275.602	12.1559	4.718e-08	2
M_0.2_F_q_Set21	1.30602	0	0	275.678	12.2317	4.54279e-08	2
M_0.2_F_q_Set22	1.11605	0	0	275.842	12.3955	4.18551e-08	2
M_0.2_F_q_Set23	1.42883	0	0	275.537	12.0905	4.87532e-08	2
M_0.2_F_q_Set24	1.16327	0	0.333333	276.31	12.8634	3.31254e-08	2
M_0.2_F_q_Set25	1.14046	0	0.166667	274.621	11.1745	7.70778e-08	3
M_0.2_F_q_Set26	1.27031	0	0.166667	272.822	9.3756	1.89476e-07	3
M_0.2_F_q_Set27	1.13162	0	0.166667	273.333	9.88661	1.46757e-07	3
M_0.2_F_q_Set28	1.16522	0	0.166667	273.82	10.3734	1.15053e-07	3
M_0.2_F_q_Set29	1.19029	0	0.166667	273.779	10.3324	1.17439e-07	3
M_0.2_F_q_Set3	1.07464	0	0.166667	276.304	12.8573	3.32309e-08	2
M_0.2_F_q_Set30	1.29809	0	0.166667	276.853	13.4061	2.52577e-08	3
M_0.2_F_q_Set31	1.19689	0	0	277.006	13.5594	2.33945e-08	3
M_0.2_F_q_Set32	1.19868	0	0.166667	277.417	13.9706	1.90472e-08	3
M_0.2_F_q_Set33	1.19614	0	0.166667	277.417	13.9706	1.90476e-08	3
M_0.2_F_q_Set34	1.12989	0	0	278.23	14.7835	1.26862e-08	3
M_0.2_F_q_Set35	1.27218	0	0	277.93	14.4833	1.4741e-08	3
M_0.2_F_q_Set36	1.26449	0	0	277.93	14.4833	1.47413e-08	3
M_0.2_F_q_Set37	1.22841	0	0.166667	270.393	6.94648	6.38467e-07	2
M_0.2_F_q_Set38	1.17039	0	0.166667	273.872	10.4255	1.1212e-07	3
M_0.2_F_q_Set39	1.19583	0	0.166667	271.19	7.74347	4.28639e-07	2
M_0.2_F_q_Set4	1.09762	0	0.166667	276.197	12.7508	3.50563e-08	2
M_0.2_F_q_Set40	1.26676	0	0	272.571	9.12461	2.14881e-07	3
M_0.2_F_q_Set41	1.13516	0	0.166667	273.248	9.80145	1.53191e-07	3
M_0.2_F_q_Set42	1.18298	0	0	273.693	10.2463	1.22644e-07	3
M_0.2_F_q_Set43	1.25969	0	0	273.789	10.3425	1.16885e-07	3
M_0.2_F_q_Set44	1.27559	0	0.166667	272.713	9.26647	2.00184e-07	3
M_0.2_F_q_Set45	1.18553	0	0.166667	273.374	9.92765	1.43835e-07	3
M_0.2_F_q_Set46	1.17242	0	0.166667	273.023	9.57672	1.71426e-07	3
M_0.2_F_q_Set47	1.41306	0	0	276.877	13.4309	2.49553e-08	3
M_0.2_F_q_Set48	1.2466	0	0	277.027	13.5806	2.31559e-08	3
M_0.2_F_q_Set49	1.27893	0	0	277.514	14.0675	1.81528e-08	3
M_0.2_F_q_Set5	1.0805	0	0.166667	276.445	12.9984	3.09816e-08	2
M_0.2_F_q_Set50	1.32164	0	0	277.622	14.1753	1.72013e-08	3
M_0.2_F_q_Set51	1.19992	0	0	277.994	14.5474	1.4281e-08	3
M_0.2_F_q_Set52	1.39701	0	0	277.863	14.4167	1.52459e-08	3
M_0.2_F_q_Set53	1.27484	0	0.166667	272.822	9.37562	1.89591e-07	3
M_0.2_F_q_Set54	1.15953	0	0.166667	276.741	13.2945	2.67212e-08	4
M_0.2_F_q_Set55	1.21975	0	0.166667	276.736	13.2896	2.67865e-08	4
M_0.2_F_q_Set56	1.22967	0	0.166667	276.736	13.2896	2.6787e-08	4
M_0.2_F_q_Set57	1.1736	0	0.166667	276.268	12.8218	3.38474e-08	4
M_0.2_F_q_Set58	1.17177	0	0.166667	276.268	12.8218	3.38481e-08	4
M_0.2_F_q_Set59	1.26971	0	0	272.571	9.12459	2.14971e-07	3
M_0.2_F_q_Set6	1.09944	0	0.166667	275.961	12.5144	3.94741e-08	2
M_0.2_F_q_Set60	1.19069	0	0	276.635	13.1888	2.81748e-08	4
M_0.2_F_q_Set61	1.23063	0	0	276.666	13.2198	2.77421e-08	4
M_0.2_F_q_Set62	1.28466	0	0	275.146	11.6999	5.93182e-08	4
M_0.2_F_q_Set63	1.18375	0	0	276.136	12.6897	3.61629e-08	4
M_0.2_F_q_Set64	1.22082	0	0	275.726	12.2799	4.43883e-08	4
M_0.2_F_q_Set7	1.13662	0	0.166667	271.975	8.52874	2.89621e-07	2
M_0.2_F_q_Set8	1.13433	0	0.166667	271.983	8.53662	2.88488e-07	2
M_0.2_F_q_Set9	1.22531	0	0.166667	270.393	6.94648	6.38899e-07	2
M_0.2_F_p_Set1	NA	1	0	272.145	8.69885	2.66022e-07	0
M_0.2_F_p_Set10	1.18896	0	0	273.924	10.4775	1.09318e-07	1
M_0.2_F_p_Set11	1.13648	0	0	274.29	10.8435	9.10404e-08	1
M_0.2_F_p_Set12	1.14471	0	0.333333	273.804	10.3576	1.16077e-07	1
M_0.2_F_p_Set13	1.16096	0.91	0	272.237	8.79057	2.54118e-07	1
M_0.2_F_p_Set14	1.10837	0.54	0.166667	271.616	8.16938	3.46685e-07	1
M_0.2_F_p_Set15	1.15821	0.65	0.166667	271.063	7.61648	4.57094e-07	1
M_0.2_F_p_Set16	1.79227	0.99	0	273.402	9.95579	1.41919e-07	1
M_0.2_F_p_Set17	1.08472	0	0	274.271	10.8242	9.19352e-08	1
M_0.2_F_p_Set18	1.36178	0.91	0	274.14	10.6931	9.8163e-08	1
M_0.2_F_p_Set19	1.11157	0	0	274.272	10.826	9.18535e-08	1
M_0.2_F_p_Set2	1.27051	0.91	0.166667	272.464	9.01776	2.26863e-07	1
M_0.2_F_p_Set20	1.04663	0	0	274.344	10.8975	8.86333e-08	1
M_0.2_F_p_Set21	1.21739	0	0	273.496	10.0498	1.35418e-07	1
M_0.2_F_p_Set22	1.29151	0	0	271.026	7.57945	4.65711e-07	1
[truncated: 51,825 more rows]

## Sheet: 4.2_final_models_evaluation
Model	Mean_AUC_ratio	Partial_ROC	Omission_rate_at_5%
M_0.1_F_lq_Set13	1.09364	0	0.25
M_0.5_F_lqt_Set51	1.12356	0	0.0833333
M_0.5_F_qt_Set51	1.12307	0	0.0833333
M_0.6_F_lpt_Set51	1.0685	0	0.0833333
M_0.6_F_pt_Set22	1.11579	0	0
M_0.6_F_pt_Set51	1.0668	0	0.0833333
M_0.7_F_lpt_Set4	1.11411	0	0
M_0.7_F_lpt_Set51	1.17591	0.644	0.0833333
M_0.7_F_lqpt_Set51	1.17591	0.674	0.0833333
M_0.7_F_pt_Set22	1.11579	0	0
M_0.7_F_pt_Set4	1.11411	0	0
M_0.7_F_pt_Set51	1.17591	0.636	0.0833333
M_0.7_F_qpt_Set51	1.17591	0.65	0.0833333
M_0.8_F_lpt_Set51	1.13719	0	0.0833333
M_0.8_F_pt_Set51	1.13755	0	0.0833333
