# Supplementary material for: Neospongodes atlantica, a potential case of an early biological introduction in the Southwestern Atlantic
Source: PeerJ. 2022 Dec 15;10:e14347. doi: 10.7717/peerj.14347 (PMC9760029; doi:10.7717/peerj.14347)
Supplement: Supplemental Information 8 — MOUFPE-CNI: Museu Oceanográfico Petrônio Alves Coelho (Cnidaria collection), Recife, PE, Brazil; MNRJ: Museu Nacional, Rio de Janeiro, RJ, Brazil. Depth (m), Expedition or R/V are provided. [file peerj-10-14347-s008.xls]

## Sheet: Specimens
Supplementary Table 1. Museum records of Neospongodes atlantica. MOUFPE-CNI: Museu Oceanográfico Petrônio Alves Coelho (Cnidaria collection), Recife, PE, Brazil; MNRJ: Museu Nacional, Rio de Janeiro, RJ, Brazil. Depth (m), Expedition or R/V are provided.
Museum	Number	Lat	Long	Locality	Depth	Collector	Date
MOUFPE-CNI	437	-0.541667	-45.6417	Off Maranhão	75	Norte/Nordeste I # 1755	1967
MOUFPE-CNI	413	-2.25	-38.25	Off Ceará	72	Canopus # 26	1965-1966
MOUFPE-CNI	414	-2.25	-38.25	Off Ceará	72	Canopus # 26	1965-1966
MOUFPE-CNI	436	-2.36667	-39.5	Off Ceará	75	Norte/Nordeste I # 1711 A	1967
MOUFPE-CNI	419	-2.68333	-39.1667	Off Ceará	63	Canopus # 66	1965-66
MOUFPE-CNI	420	-2.68333	-39.1667	Off Ceará	63	Canopus # 67	1965-66
MOUFPE-CNI	433	-2.73333	-39.0167	Off Ceará	66	Norte/Nordeste I # 1708	1967
MOUFPE-CNI	434	-2.73833	-39.0667	Off Ceará	54	Norte/Nordeste I # 1708 A	1967
MOUFPE-CNI	435	-2.73833	-39.0667	Off Ceará	55	Norte/Nordeste I # 1708 A	1968
MOUFPE-CNI	417	-2.86667	-39.0667	Off Ceará	58	Canopus # 64	1965-1966
MOUFPE-CNI	418	-2.86667	-39.0667	Off Ceará	58	Canopus # 64	1965-1966
MOUFPE-CNI	416	-2.98333	-38.9667	Off Ceará	60	Canopus # 54 double	1965-1966
MOUFPE-CNI	439	-3.56722	-38.3003	Off Ceará	70.8	Revizee NE IV #130A	2000
MOUFPE-CNI	440	-3.56722	-38.3003	Off Ceará	70.8	Revizee NE IV #130A	2000
MOUFPE-CNI	441	-3.56722	-38.3003	Off Ceará	70.8	Revizee NE IV #130A	2000
MOUFPE-CNI	442	-3.56722	-38.3003	Off Ceará	70.8	Revizee NE IV #130A	2000
MOUFPE-CNI	443	-3.56722	-38.3003	Off Ceará	70.8	Revizee NE IV #130A	2000
MOUFPE-CNI	444	-3.56722	-38.3003	Off Ceará	70.8	Revizee NE IV #130A	2000
MOUFPE-CNI	445	-3.56722	-38.3003	Off Ceará	70.8	Revizee NE IV #130A	2000
MOUFPE-CNI	415	-3.66667	-37.9	Off Ceará	54	Canopus # 52	1965-66
MOUFPE-CNI	448	-4.36833	-34.5511	Off Atol das Rocas	?	Revizee NE IV #105	2000
MOUFPE-CNI	446	-4.65083	-36.5342	Off Rio Grande do Norte	63-69	Revizee NE I # 93	1995
MOUFPE-CNI	410	-4.75	-36.4167	Off Rio Grande do Norte	45	Canopus # 109	1965-66
MOUFPE-CNI	411	-4.75	-36.4167	Off Rio Grande do Norte	45	Canopus # 109	1965-66
MOUFPE-CNI	412	-4.75	-36.4167	Off Rio Grande do Norte	45	Canopus # 109	1965-66
MOUFPE-CNI	431	-5.55667	-35.0033	Off Rio Grande do Norte	53	Norte/Nordeste I # 1657	1967
MOUFPE-CNI	432	-5.55667	-35.0033	Off Rio Grande do Norte	53	Norte/Nordeste I # 1657	1967
MOUFPE-CNI	427	-5.75139	-34.9681	Off Rio Grande do Norte	45	Canopus # 88	1965-66
MOUFPE-CNI	426	-6.06806	-34.8667	Off Rio Grande do Norte	69	Canopus # 85 double	1965-66
MOUFPE-CNI	425	-7.66667	-34.4833	Off Pernambuco	54	Canopus # 84	1965-66
MOUFPE-CNI	423	-8.16667	-34.5667	Off Pernambuco	54	Canopus # 81	1965-66
MOUFPE-CNI	424	-8.16667	-34.5667	Off Pernambuco	54	Canopus # 81	1965-66
MOUFPE-CNI	429	-8.33333	-34.65	Off Pernambuco	73-74	PE # 16	1969
MOUFPE-CNI	430	-8.33333	-34.65	Off Pernambuco	73-74	PE # 16	1969
MOUFPE-CNI	422	-8.45	-34.7	Off Pernambuco	58	Canopus # 79 double	1965-66
MOUFPE-CNI	421	-8.56667	-34.6833	Off Pernambuco	58	Canopus # 78	1965-66
MOUFPE-CNI	428	?	?	?	?	Canopus # XII 65?	1965-66
MOUFPE-CNI	438	?	?	?	?	Geomar III Banco NE	1971
MNRJ	334	-5.55111	-35.0006	Off Rio Grande do Norte	?	Saldanha - Operação N-NE I	08-10-1967
MNRJ	335	?	?	Northern Brazil	?	C. F. Hartt Expedition	?
MNRJ	1393	-13,37416667	-38,91583333	Morro de São Paulo, Costão do Forte - BA	6	A. C. J. Marques	22.02.1989
MNRJ	1842	-17,73055556	-38,98333333	Parcel das Paredes, Sudeste da Pedra Lixa - BA	16-18	C. B. Castro	24.01.1991
MNRJ	1960	-13,37416667	-38,91583333	Valença, Morro de São Paulo, Costão do Forte - BA	?	F. B. Pitombo	19.02.1989
MNRJ	1961			Valença, Morro de São Paulo, Costão do Forte - BA	?	F. B. Pitombo	22.02.1987
MNRJ	1962	-17,70166667	-38,98277778	Parcel da Lixa - BA	5	R. Novelli	15.02.1989
MNRJ	2238	-17,965	-38,77361111	Abrolhos archipelago - BA	?	F. B. Pitombo	20.11.1993
MNRJ	2475	-12,92083333	-38,61666667	Itaparica Island - BA	?	P. S. Young	03.02.1993
MNRJ	2678	?	?	Capitania dos Portos - BA	?	F. Kelmo, UFBA	21.09.1994
MNRJ	2738	-17,96666667	-38,7	Abrolhos Archipelago - BA	2020-10-01	C. B. Castro	20.03.1995
MNRJ	2763	-18.0011	-38.7539	Caravelas - BA	2020-10-01	C. A. Echeverria	20.03.1995
MNRJ	2848	-17.5158	-39.0214	Timbebas reef - BA	?	?	07.02.1996
MNRJ	2948	-17.7811	-39.0333	Abrolhos bank, Lixa reef - BA	?	C. A. Echeverria	07.06.1996
MNRJ	3062	-17.8569	-39.9933	Abrolhos bank, Parcel das Paredes - BA	?	C. B. Castro | D. O. Pires | E. G. Neves | B. S. Ramos	11.12.1996
MNRJ	3390	-12,965431	-38,517247	Quebra mar norte, Baía de Todos os Santos - BA	7	G. Muricy	01.08.1999
MNRJ	3818	-12,965431	-38,517247	Quebra mar norte, Baía de Todos os Santos - BA	?	G. Muricy	01.08.1999
MNRJ	4304	-17.48	-39.0278	Center of Timbebas, Abrolhos - BA	?	C. B. Castro	16.02.2000
MNRJ	4305	-16.8961	-39.0914	Silva Rock, Itacolomis reef - BA	?	C. B. Castro	16.02.2000
MNRJ	4877	-17,96666667	-38,65	Parcel dos Abrolhos - BA	?	N. Oc. Astro Garoupa	25.10.1997
MNRJ	5780	-12.9167	-38.5167	Santos Bay, Ponta de Mont-Serrat - BA	?	R. G. S. Berlinck	01.08.1999

## Sheet: Substrate
Supplementary Table 2. Stations from Moura et al. (2013) in which high densities Neospogodes atlantica were found and information available regarding substrate composition.
Station	Date	Latitude (°S)	Longitude (°O)	Profundidade (m)	CaCO3 (%)	Granulometria (%)			Classificação		Study Area
						Granules	Sand	Mud	Larsonneur	Used
																	Area	Station	Organic matter (%)	CACO3 (%)
93-I	1995-09-05	3.9933	35.9233	63.69	100	8.13	90.45	1.42	AB2B	Areia	Fernando de Noronha Chain						Northeastern shelf	1	1.42	98	99.42
130A-IV	2000-11-14	3.3417	38.1811	70.8	91.07	9.61	86.91	3.48	AB2B	Areia	Northern Continental Shelf							2	3.48	91.07	94.55
																	Abrolhos shelf	3	2.4	97.63	100.03
																		4	2.92	97.24	100.16
																		5	4.94	91.47	96.41
St.	CB (%)	MO (%)	GRN (%)	AMG (%)	AG (%)	AM (%)	AF (%)	AMF (%)	SIL (%)	ARG (%)	DM (f)	Grau de Seleção
4	97.63	3.4	0.88	5.75	13.36	14.93	16.86	9.11	23.8	15.3	3.81	MPS	areia muito fina
6	98.24	2.92	0.7	6.94	18.26	21.52	15.32	7.11	16.76	13.4	3.15	MPS	areia muito fina
50	81.47	4.94	1.86	4.35	5.34	8.62	11.58	19.25	27.03	21.96	4.6	MPS	silte grosso
* Granulometric fractions, percentages of biodetritic carbonates and organic matter of the sediment samples. Sediment classification, where: CB - Biodetritic calcium;MO - Organic Matter; GRN - granule, AMG - Much Coarse Sand; AG - Coarse Sand, AM - Medium Sand, AF - Fine Sand, AMF - Much Fine Sand, SIL - silte, ARG - argil, DM - Medium Diameter; MBS - Very Well Selected.

## Sheet: Fishes
	Cabeço Brasil (60-70m) - 30' de fundo	Total de espécies: 39
Família	Espécies	Número de indivíduos (aproximado) em 100m de trajeto	Observações
Haemulidae	Haemulon aurolineatum	117
Lutjanidae	Ocyurus chrysurus	72
Carangidae	Elagatis bipinnulata	70	Meia água
Lutjanidae	Lutjanus jocu	70
Pomacentridae	Chromis jubauna	70	Muitos jovens juntos à anêmona
Carangidae	Caranx bartholomaei	50	Cardume a meia água
Ephippidae	Chaetodipterus faber	50	Meia água
Carangidae	Decapterus macarellus	40	Próximos ao M.bonaci
Haemulidae	Anisotremus virginicus	30	Cardume no fundo			typical mesophotic species
Acanthuridae	Acanthurus chirurgus	29				typical shallow-water species
Carangidae	Seriola rivoliana	25	Não tenho certeza se todos eram rivoliana
Congridae	Heteroconger camelopardalis	20
Holocentridae	Myripristis jacobus	20
Labridae	Bodianus rufus	20
Chaetodontidae	Chaetodon striatus	16
Pomacentridae	Abudefduf saxatilis	14
Acanthuridae	Acanthurus coeruleus	10
Balistidae	Canthidermis sufflamen	10	Meia água
Labridae	Bodianus pulchellus	10
Labridae	Thalassoma noronhanum	10
Lutjanidae	Lutjanus analis	10
Labridae	Sparisoma frondosum	8
Carangidae	Trachinotus falcatus	6	Não tenho certeza se são falcatus ou carolinus
Haemulidae	Haemulon plumierii	6
Pomacanthidae	Holacanthus tricolor	6
Serranidae	Serranus flaviventris	6
Carangidae	Caranx crysos	5	Alguns indivíduos nos 60m
Epinephelidae	Cephalopholis fulva	5
Epinephelidae	Cephalopholis furcifer	5
Epinephelidae	Mycteroperca bonaci	5	Um dos indivíduos tinha pelo menos 1,7m
Lutjanidae	Lutjanus alexandrei	5
Grammatidae	Gramma brasiliensis	4
Gobiidae	Elacatinus figaro	4	Nas colônias de Montastrea
Lutjanidae	Lutjanus cyanopterus	3	Grandes. Saíram logo no começo
Mullidae	Pseudupeneus maculatus	3
Chaetodontidae	Prognathodes brasiliensis	2
Holocentridae	Holocentrus adscensionis	2
Labridae	Clepticus brasiliensis	2
Carangidae	Seriola dumerili	1	1,8m
Grammistidae	Rypticus saponaceus	1
Labridae	Halichoeres dimidiatus	1
Malacanthidae	Malacanthus plumieri	1
Muraenidae	Gymnothorax funebris	1	Grande indivíduo. Quase 2m
Pomacanthidae	Holacanthus ciliaris	1	30cm
Labridae	Scarus trispinosus	1	90cm
Labridae	Scarus zelindae	1
Serranidae	Serranus phoebe	1	Na areia. Muito arredio
Tetraodontidae	Canthigaster figueiredoi	1

## Sheet: Fish Families
Supplementary Table 3. Richness of fishes recorded at Cabeço Brasil Point
Family	Richness	Abundance
Acanthuridae	1	10
Balistidae	1	10
Carangidae	7	197
Chaetodontidae	1	2
Congridae	1	20
Ephippidae	1	50
Epinephelidae	3	15
Gobiidae	1	4
Grammistidae	1	1
Haemulidae	1	30
Holocentridae	2	22
Labridae	5	43
Lutjanidae	4	88
Malacanthidae	1	1
Mullidae	1	3
Muraenidae	1	1
Pomacanthidae	2	7
Pomacentridae	1	70
Scaridae	2	2
Serranidae	1	1
Tetraodontidae	1	1
